# Supplementary material for: Long-term metabolic effects of malnutrition: Liver steatosis and insulin resistance following early-life protein restriction
Source: PLoS One. 2018 Jul 2;13(7):e0199916. doi: 10.1371/journal.pone.0199916 (PMC6028108; doi:10.1371/journal.pone.0199916)
Supplement: S4 Data — (XLSX) [file pone.0199916.s004.xlsx]

## Sheet: Fasting Glucose
0.1496	0.0619	0.1498	0.0734	1.4074	1.356	1.5098	1.4802	1.2694	1.241	1.4323	1.3948	1.2497	1.2119	1.2445	1.2073	0.6567	0.6207	0.6994	0.6646	0.8359	0.7838	0.8474	0.808
0.0877		0.0764		0.0514		0.0296		0.0284		0.0375		0.0378		0.0372		0.036		0.0348		0.0521		0.0394
0.2066	0.1632	0.2159	0.1603	3.3587	3.3029	3.3063	3.2614	2.823	2.7469	2.9037	2.8592	2.0369	1.9649	1.9825	1.9403	1.0299	0.9936	1.1152	1.0676	0.1752	0.1378	0.19	0.1486
0.0434		0.0556		0.0558		0.0449		0.0761		0.0445		0.072		0.0422		0.0363		0.0476		0.0374		0.0414
0.4013	0.3307	0.4066	0.3606	3.3708	3.3237	3.4312	3.38	3.2042	3.1574	3.1941	3.1431	3.2484	3.1965	3.0687	3.0204	0.6424	0.6031	0.7293	0.6888	0.1975	0.1556	0.206	0.1504
0.0706		0.046		0.0471		0.0512		0.0468		0.051		0.0519		0.0483		0.0393		0.0405		0.0419		0.0556
0.4373	0.3984	0.6873	0.6537	3.0874	3.0423	3.0273	2.9821	1.1617	1.1219	1.4299	1.388	1.4188	1.3772	1.3955	1.3379	0.3676	0.3218	0.4189	0.36	0.1938	0.1441	0.1886	0.1409
0.0389		0.0336		0.0451		0.0452		0.0398		0.0419		0.0416		0.0576		0.0458		0.0589		0.0497		0.0477
1.2993	1.2586	1.4103	1.3694	2.5686	2.5248	2.5728	2.5272	2.25	2.2049	2.5159	2.4714	1.0493	1.009	1.0507	0.9941	0.6288	0.5884	0.6916	0.6335	0.5411	0.4898	0.598	0.5227
0.0407		0.0409		0.0438		0.0456		0.0451		0.0445		0.0403		0.0566		0.0404		0.0581		0.0513		0.0753
2.9363	2.88	3.0424	2.9865	1.3039	1.2591	1.3562	1.3147	1.4117	1.3682	1.5514	1.5142	3.3424	3.2907	3.3277	3.2744	0.7044	0.6533	0.7566	0.6994	1.049	0.9979	1.0682	1.0115
0.0563		0.0559		0.0448		0.0415		0.0435		0.0372		0.0517		0.0533		0.0511		0.0572		0.0511		0.0567
0.1766	0.0926	0.1219	0.0859	2.616	2.5663	2.5529	2.5039	2.9285	2.8801	3.0952	3.0491	2.9388	2.893	2.846	2.7964	0.1687	0.1252	0.2215	0.175	2.9656	2.9146	3.1477	3.0826
0.084		0.036		0.0497		0.049		0.0484		0.0461		0.0458		0.0496		0.0435		0.0465		0.051		0.0651
0.4099	0.3611	1.0485	0.9941	1.4404	1.3805	1.501	1.4517	2.1015	2.0536	2.1867	2.1372	1.301	1.2561	1.2908	1.2452	0.2121	0.1691	0.2621	0.1969	1.4062	1.3598	1.5422	1.4826
0.0488		0.0544		0.0599		0.0493		0.0479		0.0495		0.0449		0.0456		0.043		0.0652		0.0464		0.0596
0.0619	0.0734	Std (0.2 ng/ml)	Std (0.2 ng/ml)
0.1632	0.1603	Std (0.5 ng/ml)	Std (0.5 ng/ml)
0.3307	0.3606	Std 1 ng/ml)	Std 1 ng/ml)
0.3984	0.6537	Std (2 ng/ml)	Std (2 ng/ml)
1.2586	1.3694	Std (5 ng/ml)	Std (5 ng/ml)
2.88	2.9865	Std (10 ng/ml)	Std (10 ng/ml)
0.0926	0.0859	Blank 1	Blank 2
0.3611	0.9941	QC1	QC2
ELISA OD	ELISA OD (Duplicate)		Sample ID	Sample Insulin Values (ng/ml)	Sample Insulin Values (mg/ml)	Sample Insulin Values (mU/ml) 0.0347 mg/L insulin in 1 IU	Sample fasting glucose values (mg/dl)	Sample fasting glucose values (mg/dl)			Mice groups	Fasting glucose									Mean	STDEV	S.E.
1.356	1.4802	1	11-1 (4%+RC+HFHC)	5.23789	5.23789	150.948	135	135			18%- 4 WEEKS	167	133	197							165.667	32.0208	18.4872
3.3029	3.2614	2	11-2 (4%+RC+HFHC)	11.0717	11.0717	319.07	177	177			4%- 4 WEEKS	141	132	148	153						143.5	9.11043	4.55522
3.3237	3.38	3	12-1 (18%+RC+HFHC)	11.278	11.278	325.015	183	183
3.0423	2.9821	4	12-2 (18%+RC+HFHC)	10.2665	10.2665	295.866	168	168			18%+RC - 4 WEEKS	167	144	153							154.667	11.5902	6.69162
2.5248	2.5272	5	13-1 (4%+RC+RC)	8.78844	8.78844	253.269	128	128			4%+RC - 4 WEEKS	175	204	155							178	24.6374	14.2244
1.2591	1.3147	6	14-1 (18%+RC+RC)	4.79374	4.79374	138.148	138	138
2.5663	2.5039	7	15-1 (4%+RC+HFHC)	8.81648	8.81648	254.077	210	210			18%+RC+RC	138	155	253	188	140	139	170			169	41.4648	15.6722
1.3805	1.4517	8	15-2 (4%+RC+HFHC)	5.23117	5.23117	150.754	186	186			18%+RC+HFHC	183	168	184	173	181					177.8	6.97854	3.1209
1.241	1.3948	9	16-1 (4%+RC+RC)	4.89929	4.89929	141.19	166	166
2.7469	2.8592	10	17-1 (18%+RC+HFHC)	9.63539	9.63539	277.677	184	184			4%+RC+RC	128	166	159	160	107	152				145.333	22.9928	9.38675
3.1574	3.1431	11	17-2 (18%+RC+HFHC)	10.6796	10.6796	307.769	173	173			4%+RC+HFHC	135	177	210	186	168	228	187	210	172	185.889	27.6561	9.21871
1.1219	1.388	12	18-1 (18%+RC+RC)	4.68455	4.68455	135.001	155	155
2.2049	2.4714	13	19-1 (4%+RC+HFHC)	8.20638	8.20638	236.495	168	168
1.3682	1.5142	14	20-1 (4%+RC+RC)	5.31543	5.31543	153.182	159	159
2.8801	3.0491	15	21-1 (4%+RC+HFHC)	10.1235	10.1235	291.743	228	228
2.0536	2.1372	16	21-2 (4%+RC+HFHC)	7.44371	7.44371	214.516	187	187
1.2119	1.2073	17	22-1 (4%+RC+RC)	4.52882	4.52882	130.513	160	160											Graph with STDEV for Figure 3C
1.9649	1.9403	18	23-1 (4%+RC+HFHC)	6.98895	6.98895	201.411	210	210
3.1965	3.0204	19	23-2 (4%+RC+HFHC)	10.5548	10.5548	304.173	172	172
1.3772	1.3379	20	24-1 (4%+RC+RC)	5.03373	5.03373	145.064	107	107
1.009	0.9941	21	24-2 (4%+RC+RC)	3.80206	3.80206	109.569	152	152
3.2907	3.2744	22	25-2 (18%+RC+HFHC)	11.0729	11.0729	319.104	181	181
2.893	2.7964	23	26-1 (18%+RC+RC)	9.76161	9.76161	281.315	253	253
1.2561	1.2452	24	26-2 (18%+RC+RC)	4.66982	4.66982	134.577	188	188
0.6207	0.6646	25	27-1 (4%+RC - 5 WEEKS)	2.48647	2.48647	71.6561	175	175
0.9936	1.0676	26	27-2 (4%+RC - 5 WEEKS)	3.90485	3.90485	112.532	204	204
0.6031	0.6888	27	27-3 (4%+RC - 5 WEEKS)	2.49903	2.49903	72.0183	155	155
0.3218	0.36	28	28-1 (18%+RC - 4 WEEKS)	1.27885	1.27885	36.8544	167	167
0.5884	0.6335	29	28-2 (18%+RC - 4 WEEKS)	2.3652	2.3652	68.1615	144	144
0.6533	0.6994	30	28-3 (18%+RC - 4 WEEKS)	2.6143	2.6143	75.3401	153	153
0.1252	0.175	31	29-1 (4%- 4 WEEKS)	0.399976	0.399976	11.5267	141	141
0.1691	0.1969	32	29-2 (4%- 4 WEEKS)	0.565304	0.565304	16.2912	132	132
0.7838	0.808	33	30-1 (18%- 4 WEEKS)	3.05978	3.05978	88.178	167	167
0.1378	0.1486	34	30-2 (18%- 4 WEEKS)	0.36393	0.36393	10.4879	133	133
0.1556	0.1504	35	31-2 (4%- 4 WEEKS)	0.414961	0.414961	11.9585	148	148
0.1441	0.1409	36	31-2 (4%- 4 WEEKS)	0.36024	0.36024	10.3816	153	153
0.4898	0.5227	37	32-1 (18%- 4 WEEKS)	1.95673	1.95673	56.3901	197	197
0.9979	1.0115	38	A (18%+RC+RC)	3.81323	3.81323	109.891	140	140
2.9146	3.0826	39	G (18%+RC+RC)	10.2257	10.2257	294.689	139	139
1.3598	1.4826	40	H (18%+RC+RC)	5.24831	5.24831	151.248	170	170

## Sheet: Fasting Insulin
0.1496	0.0619	0.1498	0.0734	1.4074	1.356	1.5098	1.4802	1.2694	1.241	1.4323	1.3948	1.2497	1.2119	1.2445	1.2073	0.6567	0.6207	0.6994	0.6646	0.8359	0.7838	0.8474	0.808
0.0877		0.0764		0.0514		0.0296		0.0284		0.0375		0.0378		0.0372		0.036		0.0348		0.0521		0.0394
0.2066	0.1632	0.2159	0.1603	3.3587	3.3029	3.3063	3.2614	2.823	2.7469	2.9037	2.8592	2.0369	1.9649	1.9825	1.9403	1.0299	0.9936	1.1152	1.0676	0.1752	0.1378	0.19	0.1486
0.0434		0.0556		0.0558		0.0449		0.0761		0.0445		0.072		0.0422		0.0363		0.0476		0.0374		0.0414
0.4013	0.3307	0.4066	0.3606	3.3708	3.3237	3.4312	3.38	3.2042	3.1574	3.1941	3.1431	3.2484	3.1965	3.0687	3.0204	0.6424	0.6031	0.7293	0.6888	0.1975	0.1556	0.206	0.1504
0.0706		0.046		0.0471		0.0512		0.0468		0.051		0.0519		0.0483		0.0393		0.0405		0.0419		0.0556
0.4373	0.3984	0.6873	0.6537	3.0874	3.0423	3.0273	2.9821	1.1617	1.1219	1.4299	1.388	1.4188	1.3772	1.3955	1.3379	0.3676	0.3218	0.4189	0.36	0.1938	0.1441	0.1886	0.1409
0.0389		0.0336		0.0451		0.0452		0.0398		0.0419		0.0416		0.0576		0.0458		0.0589		0.0497		0.0477
1.2993	1.2586	1.4103	1.3694	2.5686	2.5248	2.5728	2.5272	2.25	2.2049	2.5159	2.4714	1.0493	1.009	1.0507	0.9941	0.6288	0.5884	0.6916	0.6335	0.5411	0.4898	0.598	0.5227
0.0407		0.0409		0.0438		0.0456		0.0451		0.0445		0.0403		0.0566		0.0404		0.0581		0.0513		0.0753
2.9363	2.88	3.0424	2.9865	1.3039	1.2591	1.3562	1.3147	1.4117	1.3682	1.5514	1.5142	3.3424	3.2907	3.3277	3.2744	0.7044	0.6533	0.7566	0.6994	1.049	0.9979	1.0682	1.0115
0.0563		0.0559		0.0448		0.0415		0.0435		0.0372		0.0517		0.0533		0.0511		0.0572		0.0511		0.0567
0.1766	0.0926	0.1219	0.0859	2.616	2.5663	2.5529	2.5039	2.9285	2.8801	3.0952	3.0491	2.9388	2.893	2.846	2.7964	0.1687	0.1252	0.2215	0.175	2.9656	2.9146	3.1477	3.0826
0.084		0.036		0.0497		0.049		0.0484		0.0461		0.0458		0.0496		0.0435		0.0465		0.051		0.0651
0.4099	0.3611	1.0485	0.9941	1.4404	1.3805	1.501	1.4517	2.1015	2.0536	2.1867	2.1372	1.301	1.2561	1.2908	1.2452	0.2121	0.1691	0.2621	0.1969	1.4062	1.3598	1.5422	1.4826
0.0488		0.0544		0.0599		0.0493		0.0479		0.0495		0.0449		0.0456		0.043		0.0652		0.0464		0.0596
0.0619	0.0734	Std (0.2 ng/ml)	Std (0.2 ng/ml)
0.1632	0.1603	Std (0.5 ng/ml)	Std (0.5 ng/ml)
0.3307	0.3606	Std 1 ng/ml)	Std 1 ng/ml)
0.3984	0.6537	Std (2 ng/ml)	Std (2 ng/ml)
1.2586	1.3694	Std (5 ng/ml)	Std (5 ng/ml)
2.88	2.9865	Std (10 ng/ml)	Std (10 ng/ml)
0.0926	0.0859	Blank 1	Blank 2
0.3611	0.9941	QC1	QC2
ELISA OD	ELISA OD (Duplicate)		Sample ID	Sample Insulin Values (ng/ml)	Sample Insulin Values (mg/ml)	Sample Insulin Values (mU/ml) 0.0347 mg/L insulin in 1 IU		Sample Insulin Values (mU/ml) 0.0347 mg/L insulin in 1 IU			Mice groups	Fasting Insulin									Mean	STDEV	S.E.
1.356	1.4802	1	11-1 (4%+RC+HFHC)	5.23789	5.23789	150.948		150.948			18%- 4 WEEKS	88.178	10.4879	56.3901							51.6853	39.0582	22.5502
3.3029	3.2614	2	11-2 (4%+RC+HFHC)	11.0717	11.0717	319.07		319.07			4%- 4 WEEKS	11.5267	16.2912	11.9585	10.3816						12.5395	2.58813	1.29406
3.3237	3.38	3	12-1 (18%+RC+HFHC)	11.278	11.278	325.015		325.015
3.0423	2.9821	4	12-2 (18%+RC+HFHC)	10.2665	10.2665	295.866		295.866			18%+RC - 4 WEEKS	36.8544	68.1615	75.3401							60.1186	20.4647	11.8153
2.5248	2.5272	5	13-1 (4%+RC+RC)	8.78844	8.78844	253.269		253.269			4%+RC - 4 WEEKS	71.6561	112.532	72.0183							85.4021	23.4958	13.5653
1.2591	1.3147	6	14-1 (18%+RC+RC)	4.79374	4.79374	138.148		138.148
2.5663	2.5039	7	15-1 (4%+RC+HFHC)	8.81648	8.81648	254.077		254.077			18%+RC+RC	138.148	135.001	281.315	134.577	109.891	294.689	151.248			177.838	76.3403	28.8539
1.3805	1.4517	8	15-2 (4%+RC+HFHC)	5.23117	5.23117	150.754		150.754			18%+RC+HFHC	325.015	295.866	277.677	307.769	319.104					305.086	18.9547	8.47681
1.241	1.3948	9	16-1 (4%+RC+RC)	4.89929	4.89929	141.19		141.19
2.7469	2.8592	10	17-1 (18%+RC+HFHC)	9.63539	9.63539	277.677		277.677			4%+RC+RC	253.269	141.19	153.182	130.513	145.064	109.569				155.465	50.2232	20.5035
3.1574	3.1431	11	17-2 (18%+RC+HFHC)	10.6796	10.6796	307.769		307.769			4%+RC+HFHC	150.948	319.07	254.077	150.754	236.495	291.743	214.516	201.411	304.173	235.91	62.3909	20.797
1.1219	1.388	12	18-1 (18%+RC+RC)	4.68455	4.68455	135.001		135.001
2.2049	2.4714	13	19-1 (4%+RC+HFHC)	8.20638	8.20638	236.495		236.495
1.3682	1.5142	14	20-1 (4%+RC+RC)	5.31543	5.31543	153.182		153.182
2.8801	3.0491	15	21-1 (4%+RC+HFHC)	10.1235	10.1235	291.743		291.743
2.0536	2.1372	16	21-2 (4%+RC+HFHC)	7.44371	7.44371	214.516		214.516
1.2119	1.2073	17	22-1 (4%+RC+RC)	4.52882	4.52882	130.513		130.513
1.9649	1.9403	18	23-1 (4%+RC+HFHC)	6.98895	6.98895	201.411		201.411
3.1965	3.0204	19	23-2 (4%+RC+HFHC)	10.5548	10.5548	304.173		304.173
1.3772	1.3379	20	24-1 (4%+RC+RC)	5.03373	5.03373	145.064		145.064											Graph with STDEV for Figure 3D
1.009	0.9941	21	24-2 (4%+RC+RC)	3.80206	3.80206	109.569		109.569
3.2907	3.2744	22	25-2 (18%+RC+HFHC)	11.0729	11.0729	319.104		319.104
2.893	2.7964	23	26-1 (18%+RC+RC)	9.76161	9.76161	281.315		281.315
1.2561	1.2452	24	26-2 (18%+RC+RC)	4.66982	4.66982	134.577		134.577
0.6207	0.6646	25	27-1 (4%+RC - 5 WEEKS)	2.48647	2.48647	71.6561		71.6561
0.9936	1.0676	26	27-2 (4%+RC - 5 WEEKS)	3.90485	3.90485	112.532		112.532
0.6031	0.6888	27	27-3 (4%+RC - 5 WEEKS)	2.49903	2.49903	72.0183		72.0183
0.3218	0.36	28	28-1 (18%+RC - 4 WEEKS)	1.27885	1.27885	36.8544		36.8544
0.5884	0.6335	29	28-2 (18%+RC - 4 WEEKS)	2.3652	2.3652	68.1615		68.1615
0.6533	0.6994	30	28-3 (18%+RC - 4 WEEKS)	2.6143	2.6143	75.3401		75.3401
0.1252	0.175	31	29-1 (4%- 4 WEEKS)	0.399976	0.399976	11.5267		11.5267
0.1691	0.1969	32	29-2 (4%- 4 WEEKS)	0.565304	0.565304	16.2912		16.2912
0.7838	0.808	33	30-1 (18%- 4 WEEKS)	3.05978	3.05978	88.178		88.178
0.1378	0.1486	34	30-2 (18%- 4 WEEKS)	0.36393	0.36393	10.4879		10.4879
0.1556	0.1504	35	31-2 (4%- 4 WEEKS)	0.414961	0.414961	11.9585		11.9585
0.1441	0.1409	36	31-2 (4%- 4 WEEKS)	0.36024	0.36024	10.3816		10.3816
0.4898	0.5227	37	32-1 (18%- 4 WEEKS)	1.95673	1.95673	56.3901		56.3901
0.9979	1.0115	38	A (18%+RC+RC)	3.81323	3.81323	109.891		109.891
2.9146	3.0826	39	G (18%+RC+RC)	10.2257	10.2257	294.689		294.689
1.3598	1.4826	40	H (18%+RC+RC)	5.24831	5.24831	151.248		151.248
