# Supplementary material for: Long-term metabolic effects of malnutrition: Liver steatosis and insulin resistance following early-life protein restriction
Source: PLoS One. 2018 Jul 2;13(7):e0199916. doi: 10.1371/journal.pone.0199916 (PMC6028108; doi:10.1371/journal.pone.0199916)
Supplement: S10 Data — (XLS) [file pone.0199916.s010.xls]

## Sheet: Plate 3 SMA_TNF_IL1a_analyzed
SDS 2.4	AQ Results	1
Filename	Plate 3 SMA_TNF_IL1a
PlateID
Assay Type	Absolute Quantification
Run DateTime	2015-12-20 21:57:26
Operator
ThermalCycleParams
Sample Information
Well	Sample Name	Detector Name	Reporter	Task	Ct	Tm Value	Tm Type	Quantity	Qty Mean	Qty StdDev	Ct Median	Ct Mean	Ct StdDev	Ct Type	Template Name	Baseline Type	Baseline Start	Baseline Stop	Threshold Type	Threshold	FOS	HMD	LME	EW	BPR	NAW	HNS	HRN	EAF	BAF	TAF	CAF
225	1 (11-1)	IL-1a	SYBR	Unknown	26.6007	82.8	Auto Tm	62.5111	68.0047	7.2908	26.5449	26.4951	0.137561	Manual Ct		Manual	10	21	Manual	0.3839
249	1 (11-1)	IL-1a	SYBR	Unknown	26.5449	82.8	Auto Tm	65.2269	68.0047	7.2908	26.5449	26.4951	0.137561	Manual Ct		Manual	10	21	Manual	0.3839
273	1 (11-1)	IL-1a	SYBR	Unknown	26.3395	82.8	Auto Tm	76.2761	68.0047	7.2908	26.5449	26.4951	0.137561	Manual Ct		Manual	10	21	Manual	0.3839
234	10 (17-1)	IL-1a	SYBR	Unknown	26.2277	82.7	Auto Tm	83.0609	81.9657	5.49435	26.2277	26.2471	0.0889773	Manual Ct		Manual	10	21	Manual	0.3839
258	10 (17-1)	IL-1a	SYBR	Unknown	26.3442	82.7	Auto Tm	76.0062	81.9657	5.49435	26.2277	26.2471	0.0889773	Manual Ct		Manual	10	21	Manual	0.3839
282	10 (17-1)	IL-1a	SYBR	Unknown	26.1694	82.7	Auto Tm	86.8299	81.9657	5.49435	26.2277	26.2471	0.0889773	Manual Ct		Manual	10	21	Manual	0.3839
235	11 (17-2)	IL-1a	SYBR	Unknown	24.9822	82.7	Auto Tm	214.53	213.592	1.03518	24.9869	24.988	0.00636493	Manual Ct		Manual	10	21	Manual	0.3839
259	11 (17-2)	IL-1a	SYBR	Unknown	24.9869	82.7	Auto Tm	213.764	213.592	1.03518	24.9869	24.988	0.00636493	Manual Ct		Manual	10	21	Manual	0.3839
283	11 (17-2)	IL-1a	SYBR	Unknown	24.9948	82.7	Auto Tm	212.481	213.592	1.03518	24.9869	24.988	0.00636493	Manual Ct		Manual	10	21	Manual	0.3839
236	12 (18-1)	IL-1a	SYBR	Unknown	27.2393	82.7	Auto Tm	38.4296	38.8292	1.21291	27.2393	27.2262	0.0407317	Manual Ct		Manual	10	21	Manual	0.3839
260	12 (18-1)	IL-1a	SYBR	Unknown	27.2587	82.7	Auto Tm	37.8666	38.8292	1.21291	27.2393	27.2262	0.0407317	Manual Ct		Manual	10	21	Manual	0.3839
284	12 (18-1)	IL-1a	SYBR	Unknown	27.1805	82.7	Auto Tm	40.1916	38.8292	1.21291	27.2393	27.2262	0.0407317	Manual Ct		Manual	10	21	Manual	0.3839
237	13 (19-1)	IL-1a	SYBR	Unknown	25.9826	82.7	Auto Tm	100.112	94.7969	7.09078	26.0168	26.0567	0.100186	Manual Ct		Manual	10	21	Manual	0.3839
261	13 (19-1)	IL-1a	SYBR	Unknown	26.1707	82.7	Auto Tm	86.7457	94.7969	7.09078	26.0168	26.0567	0.100186	Manual Ct		Manual	10	21	Manual	0.3839
285	13 (19-1)	IL-1a	SYBR	Unknown	26.0168	82.7	Auto Tm	97.5333	94.7969	7.09078	26.0168	26.0567	0.100186	Manual Ct		Manual	10	21	Manual	0.3839
238	14 (20-1)	IL-1a	SYBR	Unknown	26.417	82.7	Auto Tm	71.9036	72.0724	2.93365	26.417	26.4146	0.0533656	Manual Ct		Manual	10	21	Manual	0.3839
262	14 (20-1)	IL-1a	SYBR	Unknown	26.3601	82.4	Auto Tm	75.0868	72.0724	2.93365	26.417	26.4146	0.0533656	Manual Ct		Manual	10	21	Manual	0.3839
286	14 (20-1)	IL-1a	SYBR	Unknown	26.4668	82.4	Auto Tm	69.2268	72.0724	2.93365	26.417	26.4146	0.0533656	Manual Ct		Manual	10	21	Manual	0.3839
239	15 (21-1)	IL-1a	SYBR	Unknown	26.5799	82.4	Auto Tm	63.5113	58.7876	4.24013	26.7095	26.6836	0.093463	Manual Ct		Manual	10	21	Manual	0.3839
263	15 (21-1)	IL-1a	SYBR	Unknown	26.7095	82.4	Auto Tm	57.5407	58.7876	4.24013	26.7095	26.6836	0.093463	Manual Ct		Manual	10	21	Manual	0.3839
287	15 (21-1)	IL-1a	SYBR	Unknown	26.7614	82.4	Auto Tm	55.3107	58.7876	4.24013	26.7095	26.6836	0.093463	Manual Ct		Manual	10	21	Manual	0.3839
240	16 (21-2)	IL-1a	SYBR	Unknown	26.4221	82.4	Auto Tm	71.6247	75.3015	3.45261	26.3476	26.3573	0.0605236	Manual Ct		Manual	10	21	Manual	0.3839
264	16 (21-2)	IL-1a	SYBR	Unknown	26.3476	82.4	Auto Tm	75.8053	75.3015	3.45261	26.3476	26.3573	0.0605236	Manual Ct		Manual	10	21	Manual	0.3839
288	16 (21-2)	IL-1a	SYBR	Unknown	26.3022	82.4	Auto Tm	78.4746	75.3015	3.45261	26.3476	26.3573	0.0605236	Manual Ct		Manual	10	21	Manual	0.3839
289	17 (22-1)	IL-1a	SYBR	Unknown	27.5121	82.3	Auto Tm	31.2178	32.0967	1.04253	27.4869	27.4761	0.0423956	Manual Ct		Manual	10	21	Manual	0.3839
313	17 (22-1)	IL-1a	SYBR	Unknown	27.4869	82.3	Auto Tm	31.8238	32.0967	1.04253	27.4869	27.4761	0.0423956	Manual Ct		Manual	10	21	Manual	0.3839
337	17 (22-1)	IL-1a	SYBR	Unknown	27.4294	82.1	Auto Tm	33.2486	32.0967	1.04253	27.4869	27.4761	0.0423956	Manual Ct		Manual	10	21	Manual	0.3839
290	18 (23-1)	IL-1a	SYBR	Unknown	27.9338	82.3	Auto Tm	22.6402	22.3948	0.212836	27.9547	27.9481	0.0124407	Manual Ct		Manual	10	21	Manual	0.3839
314	18 (23-1)	IL-1a	SYBR	Unknown	27.9547	82.3	Auto Tm	22.2821	22.3948	0.212836	27.9547	27.9481	0.0124407	Manual Ct		Manual	10	21	Manual	0.3839
338	18 (23-1)	IL-1a	SYBR	Unknown	27.9559	82.3	Auto Tm	22.262	22.3948	0.212836	27.9547	27.9481	0.0124407	Manual Ct		Manual	10	21	Manual	0.3839
291	19 (23-2)	IL-1a	SYBR	Unknown	27.0626	82.6	Auto Tm	43.9692	43.6586	1.72794	27.0626	27.0726	0.0522471	Manual Ct		Manual	10	21	Manual	0.3839
315	19 (23-2)	IL-1a	SYBR	Unknown	27.026	82.3	Auto Tm	45.2102	43.6586	1.72794	27.0626	27.0726	0.0522471	Manual Ct		Manual	10	21	Manual	0.3839
339	19 (23-2)	IL-1a	SYBR	Unknown	27.1291	82.3	Auto Tm	41.7964	43.6586	1.72794	27.0626	27.0726	0.0522471	Manual Ct		Manual	10	21	Manual	0.3839
226	2 (11-2)	IL-1a	SYBR	Unknown	26.0441	82.8	Auto Tm	95.5322	104.397	8.42039	25.9154	25.9305	0.106858	Manual Ct		Manual	10	21	Manual	0.3839
250	2 (11-2)	IL-1a	SYBR	Unknown	25.8319	82.8	Auto Tm	112.288	104.397	8.42039	25.9154	25.9305	0.106858	Manual Ct		Manual	10	21	Manual	0.3839
274	2 (11-2)	IL-1a	SYBR	Unknown	25.9154	82.8	Auto Tm	105.371	104.397	8.42039	25.9154	25.9305	0.106858	Manual Ct		Manual	10	21	Manual	0.3839
292	20 (24-1)	IL-1a	SYBR	Unknown	28.4099	82.6	Auto Tm	15.7521	17.9436	2.40353	28.267	28.2467	0.174234	Manual Ct		Manual	10	21	Manual	0.3839
316	20 (24-1)	IL-1a	SYBR	Unknown	28.0632	82.3	Auto Tm	20.5141	17.9436	2.40353	28.267	28.2467	0.174234	Manual Ct		Manual	10	21	Manual	0.3839
340	20 (24-1)	IL-1a	SYBR	Unknown	28.267	82.3	Auto Tm	17.5647	17.9436	2.40353	28.267	28.2467	0.174234	Manual Ct		Manual	10	21	Manual	0.3839
293	21 (24-2)	IL-1a	SYBR	Unknown	26.492	82.6	Auto Tm	67.9076	66.6241	6.67323	26.492	26.5216	0.133797	Manual Ct		Manual	10	21	Manual	0.3839
317	21 (24-2)	IL-1a	SYBR	Unknown	26.6677	82.6	Auto Tm	59.4023	66.6241	6.67323	26.492	26.5216	0.133797	Manual Ct		Manual	10	21	Manual	0.3839
341	21 (24-2)	IL-1a	SYBR	Unknown	26.405	82.6	Auto Tm	72.5623	66.6241	6.67323	26.492	26.5216	0.133797	Manual Ct		Manual	10	21	Manual	0.3839
294	22 (25-2)	IL-1a	SYBR	Unknown	27.0949	82.6	Auto Tm	42.8988	47.2015	3.74017	26.9195	26.9723	0.106536	Manual Ct		Manual	10	21	Manual	0.3839
318	22 (25-2)	IL-1a	SYBR	Unknown	26.9195	82.6	Auto Tm	49.0312	47.2015	3.74017	26.9195	26.9723	0.106536	Manual Ct		Manual	10	21	Manual	0.3839
342	22 (25-2)	IL-1a	SYBR	Unknown	26.9024	82.6	Auto Tm	49.6747	47.2015	3.74017	26.9195	26.9723	0.106536	Manual Ct		Manual	10	21	Manual	0.3839
295	23 (26-1)	IL-1a	SYBR	Unknown	27.435	82.6	Auto Tm	33.1079	35.661	2.23963	27.304	27.3392	0.0838741	Manual Ct		Manual	10	21	Manual	0.3839
319	23 (26-1)	IL-1a	SYBR	Unknown	27.2787	82.6	Auto Tm	37.2943	35.661	2.23963	27.304	27.3392	0.0838741	Manual Ct		Manual	10	21	Manual	0.3839
343	23 (26-1)	IL-1a	SYBR	Unknown	27.304	82.6	Auto Tm	36.5808	35.661	2.23963	27.304	27.3392	0.0838741	Manual Ct		Manual	10	21	Manual	0.3839
296	24 (26-2)	IL-1a	SYBR	Unknown	28.0122	82.8	Auto Tm	21.3266	19.3508	3.37548	28.0156	28.1543	0.243158	Manual Ct		Manual	10	21	Manual	0.3839
320	24 (26-2)	IL-1a	SYBR	Unknown	28.0156	82.6	Auto Tm	21.2726	19.3508	3.37548	28.0156	28.1543	0.243158	Manual Ct		Manual	10	21	Manual	0.3839
344	24 (26-2)	IL-1a	SYBR	Unknown	28.4351	82.6	Auto Tm	15.4533	19.3508	3.37548	28.0156	28.1543	0.243158	Manual Ct		Manual	10	21	Manual	0.3839
297	25 (27-1)	IL-1a	SYBR	Unknown	27.146	82.8	Auto Tm	41.2616	43.3653	5.32776	27.146	27.0871	0.157087	Manual Ct		Manual	10	21	Manual	0.3839
321	25 (27-1)	IL-1a	SYBR	Unknown	27.2062	82.8	Auto Tm	39.4106	43.3653	5.32776	27.146	27.0871	0.157087	Manual Ct		Manual	10	21	Manual	0.3839
345	25 (27-1)	IL-1a	SYBR	Unknown	26.9091	82.8	Auto Tm	49.4237	43.3653	5.32776	27.146	27.0871	0.157087	Manual Ct		Manual	10	21	Manual	0.3839
298	26 (27-2)	IL-1a	SYBR	Unknown	26.6661	82.8	Auto Tm	59.4725	59.4484	0.755178	26.6661	26.6667	0.0166794	Manual Ct		Manual	10	21	Manual	0.3839
322	26 (27-2)	IL-1a	SYBR	Unknown	26.6837	82.8	Auto Tm	58.6815	59.4484	0.755178	26.6661	26.6667	0.0166794	Manual Ct		Manual	10	21	Manual	0.3839
346	26 (27-2)	IL-1a	SYBR	Unknown	26.6504	82.8	Auto Tm	60.1912	59.4484	0.755178	26.6661	26.6667	0.0166794	Manual Ct		Manual	10	21	Manual	0.3839
299	27 (27-3)	IL-1a	SYBR	Unknown	26.6515	82.8	Auto Tm	60.1408	62.3136	3.76756	26.6515	26.6065	0.0780658	Manual Ct		Manual	10	21	Manual	0.3839
323	27 (27-3)	IL-1a	SYBR	Unknown	26.6516	82.8	Auto Tm	60.1361	62.3136	3.76756	26.6515	26.6065	0.0780658	Manual Ct		Manual	10	21	Manual	0.3839
347	27 (27-3)	IL-1a	SYBR	Unknown	26.5163	82.8	Auto Tm	66.664	62.3136	3.76756	26.6515	26.6065	0.0780658	Manual Ct		Manual	10	21	Manual	0.3839
300	28 (28-1)	IL-1a	SYBR	Unknown	27.9891	82.8	Auto Tm	21.7054	21.3123	0.342447	28.023	28.0132	0.0209991	Manual Ct		Manual	10	21	Manual	0.3839
324	28 (28-1)	IL-1a	SYBR	Unknown	28.0276	82.8	Auto Tm	21.0787	21.3123	0.342447	28.023	28.0132	0.0209991	Manual Ct		Manual	10	21	Manual	0.3839
348	28 (28-1)	IL-1a	SYBR	Unknown	28.023	82.8	Auto Tm	21.1529	21.3123	0.342447	28.023	28.0132	0.0209991	Manual Ct		Manual	10	21	Manual	0.3839
301	29 (28-2)	IL-1a	SYBR	Unknown	26.9842	82.8	Auto Tm	46.6753	51.3314	4.08881	26.8178	26.8622	0.106901	Manual Ct		Manual	10	21	Manual	0.3839
325	29 (28-2)	IL-1a	SYBR	Unknown	26.8178	82.8	Auto Tm	52.9817	51.3314	4.08881	26.8178	26.8622	0.106901	Manual Ct		Manual	10	21	Manual	0.3839
349	29 (28-2)	IL-1a	SYBR	Unknown	26.7847	82.8	Auto Tm	54.3371	51.3314	4.08881	26.8178	26.8622	0.106901	Manual Ct		Manual	10	21	Manual	0.3839
227	3 (12-1)	IL-1a	SYBR	Unknown	27.3368	83	Auto Tm	35.6795	36.0417	0.877804	27.3368	27.3238	0.0317739	Manual Ct		Manual	10	21	Manual	0.3839
251	3 (12-1)	IL-1a	SYBR	Unknown	27.347	82.8	Auto Tm	35.4029	36.0417	0.877804	27.3368	27.3238	0.0317739	Manual Ct		Manual	10	21	Manual	0.3839
275	3 (12-1)	IL-1a	SYBR	Unknown	27.2876	82.8	Auto Tm	37.0426	36.0417	0.877804	27.3368	27.3238	0.0317739	Manual Ct		Manual	10	21	Manual	0.3839
302	30 (28-3)	IL-1a	SYBR	Unknown	27.4104	82.8	Auto Tm	33.7335	35.9392	1.92057	27.2947	27.3285	0.0712414	Manual Ct		Manual	10	21	Manual	0.3839
326	30 (28-3)	IL-1a	SYBR	Unknown	27.2805	82.8	Auto Tm	37.2414	35.9392	1.92057	27.2947	27.3285	0.0712414	Manual Ct		Manual	10	21	Manual	0.3839
350	30 (28-3)	IL-1a	SYBR	Unknown	27.2947	82.8	Auto Tm	36.8426	35.9392	1.92057	27.2947	27.3285	0.0712414	Manual Ct		Manual	10	21	Manual	0.3839
303	31 (29-1)	IL-1a	SYBR	Unknown	26.1056	82.8	Auto Tm	91.1595	90.3588	2.10445	26.1056	26.1174	0.0307488	Manual Ct		Manual	10	21	Manual	0.3839
327	31 (29-1)	IL-1a	SYBR	Unknown	26.1523	82.8	Auto Tm	87.9716	90.3588	2.10445	26.1056	26.1174	0.0307488	Manual Ct		Manual	10	21	Manual	0.3839
351	31 (29-1)	IL-1a	SYBR	Unknown	26.0943	82.8	Auto Tm	91.9455	90.3588	2.10445	26.1056	26.1174	0.0307488	Manual Ct		Manual	10	21	Manual	0.3839
304	32 (29-2)	IL-1a	SYBR	Unknown	25.9072	82.7	Auto Tm	106.032	101.748	10.4212	25.9072	25.9661	0.138477	Manual Ct		Manual	10	21	Manual	0.3839
328	32 (29-2)	IL-1a	SYBR	Unknown	26.1243	82.7	Auto Tm	89.868	101.748	10.4212	25.9072	25.9661	0.138477	Manual Ct		Manual	10	21	Manual	0.3839
352	32 (29-2)	IL-1a	SYBR	Unknown	25.8668	82.7	Auto Tm	109.345	101.748	10.4212	25.9072	25.9661	0.138477	Manual Ct		Manual	10	21	Manual	0.3839
305	33 (30-1)	IL-1a	SYBR	Unknown	26.9541	82.7	Auto Tm	47.7553	46.6181	0.985407	27.0009	26.986	0.0275803	Manual Ct		Manual	10	21	Manual	0.3839
329	33 (30-1)	IL-1a	SYBR	Unknown	27.0009	82.7	Auto Tm	46.0829	46.6181	0.985407	27.0009	26.986	0.0275803	Manual Ct		Manual	10	21	Manual	0.3839
353	33 (30-1)	IL-1a	SYBR	Unknown	27.0028	82.7	Auto Tm	46.0161	46.6181	0.985407	27.0009	26.986	0.0275803	Manual Ct		Manual	10	21	Manual	0.3839
306	34 (30-2)	IL-1a	SYBR	Unknown	25.6186	82.7	Auto Tm	132.111	133.209	1.18303	25.6092	25.6077	0.011647	Manual Ct		Manual	10	21	Manual	0.3839
330	34 (30-2)	IL-1a	SYBR	Unknown	25.5954	82.7	Auto Tm	134.462	133.209	1.18303	25.6092	25.6077	0.011647	Manual Ct		Manual	10	21	Manual	0.3839
354	34 (30-2)	IL-1a	SYBR	Unknown	25.6092	82.7	Auto Tm	133.054	133.209	1.18303	25.6092	25.6077	0.011647	Manual Ct		Manual	10	21	Manual	0.3839
307	35 (31-1)	IL-1a	SYBR	Unknown	25.6933	82.7	Auto Tm	124.8	121.858	10.1794	25.6933	25.7277	0.111746	Manual Ct		Manual	10	21	Manual	0.3839
331	35 (31-1)	IL-1a	SYBR	Unknown	25.8526	82.7	Auto Tm	110.531	121.858	10.1794	25.6933	25.7277	0.111746	Manual Ct		Manual	10	21	Manual	0.3839
355	35 (31-1)	IL-1a	SYBR	Unknown	25.6373	82.7	Auto Tm	130.242	121.858	10.1794	25.6933	25.7277	0.111746	Manual Ct		Manual	10	21	Manual	0.3839
308	36 (31-2)	IL-1a	SYBR	Unknown	25.4786	82.7	Auto Tm	146.979	157.118	10.6492	25.399	25.393	0.0887109	Manual Ct		Manual	10	21	Manual	0.3839
332	36 (31-2)	IL-1a	SYBR	Unknown	25.399	82.5	Auto Tm	156.162	157.118	10.6492	25.399	25.393	0.0887109	Manual Ct		Manual	10	21	Manual	0.3839
356	36 (31-2)	IL-1a	SYBR	Unknown	25.3015	82.5	Auto Tm	168.213	157.118	10.6492	25.399	25.393	0.0887109	Manual Ct		Manual	10	21	Manual	0.3839
309	37 (32-1)	IL-1a	SYBR	Unknown	27.3178	82.4	Auto Tm	36.1981	35.6614	2.84243	27.3178	27.3403	0.106007	Manual Ct		Manual	10	21	Manual	0.3839
333	37 (32-1)	IL-1a	SYBR	Unknown	27.2473	82.4	Auto Tm	38.1972	35.6614	2.84243	27.3178	27.3403	0.106007	Manual Ct		Manual	10	21	Manual	0.3839
357	37 (32-1)	IL-1a	SYBR	Unknown	27.4557	82.4	Auto Tm	32.5888	35.6614	2.84243	27.3178	27.3403	0.106007	Manual Ct		Manual	10	21	Manual	0.3839
310	38 (A)	IL-1a	SYBR	Unknown	28.784	82.4	Auto Tm	11.8457	11.9035	0.849233	28.784	28.7798	0.0934791	Manual Ct		Manual	10	21	Manual	0.3839
334	38 (A)	IL-1a	SYBR	Unknown	28.8712	82.4	Auto Tm	11.0846	11.9035	0.849233	28.784	28.7798	0.0934791	Manual Ct		Manual	10	21	Manual	0.3839
358	38 (A)	IL-1a	SYBR	Unknown	28.6843	82.4	Auto Tm	12.7802	11.9035	0.849233	28.784	28.7798	0.0934791	Manual Ct		Manual	10	21	Manual	0.3839
311	39 (G)	IL-1a	SYBR	Unknown	27.8967	82.4	Auto Tm	23.2894	22.9064	0.584946	27.9019	27.9187	0.0337652	Manual Ct		Manual	10	21	Manual	0.3839
335	39 (G)	IL-1a	SYBR	Unknown	27.9019	82.4	Auto Tm	23.1966	22.9064	0.584946	27.9019	27.9187	0.0337652	Manual Ct		Manual	10	21	Manual	0.3839
359	39 (G)	IL-1a	SYBR	Unknown	27.9576	82.1	Auto Tm	22.2331	22.9064	0.584946	27.9019	27.9187	0.0337652	Manual Ct		Manual	10	21	Manual	0.3839
228	4 (12-2)	IL-1a	SYBR	Unknown	26.1124	83	Auto Tm	90.6882	94.1216	2.99637	26.0449	26.064	0.0421576	Manual Ct		Manual	10	21	Manual	0.3839
252	4 (12-2)	IL-1a	SYBR	Unknown	26.0348	82.8	Auto Tm	96.2086	94.1216	2.99637	26.0449	26.064	0.0421576	Manual Ct		Manual	10	21	Manual	0.3839
276	4 (12-2)	IL-1a	SYBR	Unknown	26.0449	82.8	Auto Tm	95.4679	94.1216	2.99637	26.0449	26.064	0.0421576	Manual Ct		Manual	10	21	Manual	0.3839
312	40 (H)	IL-1a	SYBR	Unknown	27.2463	82.4	Auto Tm	38.225	37.7545	1.31699	27.2463	27.2631	0.0461786	Manual Ct		Manual	10	21	Manual	0.3839
336	40 (H)	IL-1a	SYBR	Unknown	27.2277	82.4	Auto Tm	38.7717	37.7545	1.31699	27.2463	27.2631	0.0461786	Manual Ct		Manual	10	21	Manual	0.3839
360	40 (H)	IL-1a	SYBR	Unknown	27.3153	82.1	Auto Tm	36.2669	37.7545	1.31699	27.2463	27.2631	0.0461786	Manual Ct		Manual	10	21	Manual	0.3839
229	5 (13-1)	IL-1a	SYBR	Unknown	28.2193	83	Auto Tm	18.2135	17.787	0.91	28.2193	28.2516	0.0681548	Manual Ct		Manual	10	21	Manual	0.3839
253	5 (13-1)	IL-1a	SYBR	Unknown	28.2056	83	Auto Tm	18.4055	17.787	0.91	28.2193	28.2516	0.0681548	Manual Ct		Manual	10	21	Manual	0.3839
277	5 (13-1)	IL-1a	SYBR	Unknown	28.3299	82.8	Auto Tm	16.7421	17.787	0.91	28.2193	28.2516	0.0681548	Manual Ct		Manual	10	21	Manual	0.3839
230	6 (14-1)	IL-1a	SYBR	Unknown	27.3175	82.8	Auto Tm	36.2077	41.067	7.36734	27.2732	27.1655	0.225944	Manual Ct		Manual	10	21	Manual	0.3839
254	6 (14-1)	IL-1a	SYBR	Unknown	27.2732	82.8	Auto Tm	37.4495	41.067	7.36734	27.2732	27.1655	0.225944	Manual Ct		Manual	10	21	Manual	0.3839
278	6 (14-1)	IL-1a	SYBR	Unknown	26.9059	82.8	Auto Tm	49.5438	41.067	7.36734	27.2732	27.1655	0.225944	Manual Ct		Manual	10	21	Manual	0.3839
231	7 (15-1)	IL-1a	SYBR	Unknown	26.4882	82.8	Auto Tm	68.1075	70.8192	5.47185	26.4882	26.4395	0.0994104	Manual Ct		Manual	10	21	Manual	0.3839
255	7 (15-1)	IL-1a	SYBR	Unknown	26.5052	82.8	Auto Tm	67.2327	70.8192	5.47185	26.4882	26.4395	0.0994104	Manual Ct		Manual	10	21	Manual	0.3839
279	7 (15-1)	IL-1a	SYBR	Unknown	26.3251	82.8	Auto Tm	77.1173	70.8192	5.47185	26.4882	26.4395	0.0994104	Manual Ct		Manual	10	21	Manual	0.3839
232	8 (15-2)	IL-1a	SYBR	Unknown	26.8235	82.7	Auto Tm	52.7525	46.3851	5.66221	27.0472	26.9987	0.156648	Manual Ct		Manual	10	21	Manual	0.3839
256	8 (15-2)	IL-1a	SYBR	Unknown	27.1253	82.7	Auto Tm	41.9158	46.3851	5.66221	27.0472	26.9987	0.156648	Manual Ct		Manual	10	21	Manual	0.3839
280	8 (15-2)	IL-1a	SYBR	Unknown	27.0472	82.7	Auto Tm	44.4869	46.3851	5.66221	27.0472	26.9987	0.156648	Manual Ct		Manual	10	21	Manual	0.3839
233	9 (16-1)	IL-1a	SYBR	Unknown	28.729	82.7	Auto Tm	12.3527	15.1652	3.32629	28.5363	28.4802	0.28114	Manual Ct		Manual	10	21	Manual	0.3839
257	9 (16-1)	IL-1a	SYBR	Unknown	28.5363	82.7	Auto Tm	14.306	15.1652	3.32629	28.5363	28.4802	0.28114	Manual Ct		Manual	10	21	Manual	0.3839
281	9 (16-1)	IL-1a	SYBR	Unknown	28.1752	82.7	Auto Tm	18.8367	15.1652	3.32629	28.5363	28.4802	0.28114	Manual Ct		Manual	10	21	Manual	0.3839
378	Gene 3 Standard (1)	IL-1a	SYBR	Standard	32.2193	81.9	Auto Tm	1						Manual Ct		Manual	10	21	Manual	0.3839
375	Gene 3 Standard (10)	IL-1a	SYBR	Standard	28.9912	82.5	Auto Tm	10						Manual Ct		Manual	10	21	Manual	0.3839
376	Gene 3 Standard (10)	IL-1a	SYBR	Standard	28.6399	82.5	Auto Tm	10						Manual Ct		Manual	10	21	Manual	0.3839
373	Gene 3 Standard (100)	IL-1a	SYBR	Standard	26.0668	83.6	Auto Tm	100						Manual Ct		Manual	10	21	Manual	0.3839
374	Gene 3 Standard (100)	IL-1a	SYBR	Standard	26.0921	83.6	Auto Tm	100						Manual Ct		Manual	10	21	Manual	0.3839
381	NTC Gene 3	IL-1a	SYBR	NTC	32.5331	75	Auto Tm	0.680847						Manual Ct		Manual	10	21	Manual	0.3839
384	RT Negative 3	IL-1a	SYBR	NTC	36.8363	73.7	Auto Tm	0.025658						Manual Ct		Manual	10	21	Manual	0.3839
Slope	-3.02225	cycles/log decade
Y-Intercept		32.0286
R^2		0.992649
Well	Sample Name	Detector Name	Reporter	Task	Ct	Tm Value	Tm Type	Quantity	Qty Mean	Qty StdDev	Ct Median	Ct Mean	Ct StdDev	Ct Type	Template Name	Baseline Type	Baseline Start	Baseline Stop	Threshold Type	Threshold	FOS	HMD	LME	EW	BPR	NAW	HNS	HRN	EAF	BAF	TAF	CAF
1	1 (11-1)	SMA-a	SYBR	Unknown	26.9844	84.5	Auto Tm	26.6366	29.6077	2.68256	26.8303	26.8624	0.109603	Manual Ct		Manual	10	19	Manual	0.387382
25	1 (11-1)	SMA-a	SYBR	Unknown	26.8303	84.7	Auto Tm	30.3347	29.6077	2.68256	26.8303	26.8624	0.109603	Manual Ct		Manual	10	19	Manual	0.387382
49	1 (11-1)	SMA-a	SYBR	Unknown	26.7724	84.7	Auto Tm	31.8519	29.6077	2.68256	26.8303	26.8624	0.109603	Manual Ct		Manual	10	19	Manual	0.387382
34	10 (17-1)	SMA-a	SYBR	Unknown	24.2398	85.2	Auto Tm	269.573	239.485	42.5503	24.3895	24.3895	0.211811	Manual Ct		Manual	10	19	Manual	0.387382
58	10 (17-1)	SMA-a	SYBR	Unknown	24.5393	85.2	Auto Tm	209.397	239.485	42.5503	24.3895	24.3895	0.211811	Manual Ct		Manual	10	19	Manual	0.387382
58	10 (17-1)	SMA-a	SYBR	Unknown	24.5393	85.2	Auto Tm	209.397	239.485	42.5503	24.3895	24.3895	0.211811	Manual Ct		Manual	10	19	Manual	0.387382
11	11 (17-2)	SMA-a	SYBR	Unknown	23.8819	85.2	Auto Tm	364.549	348.031	18.7324	23.9238	23.938	0.0644002	Manual Ct		Manual	10	19	Manual	0.387382
35	11 (17-2)	SMA-a	SYBR	Unknown	23.9238	85.2	Auto Tm	351.866	348.031	18.7324	23.9238	23.938	0.0644002	Manual Ct		Manual	10	19	Manual	0.387382
59	11 (17-2)	SMA-a	SYBR	Unknown	24.0083	85.2	Auto Tm	327.678	348.031	18.7324	23.9238	23.938	0.0644002	Manual Ct		Manual	10	19	Manual	0.387382
12	12 (18-1)	SMA-a	SYBR	Unknown	26.7596	85.2	Auto Tm	32.1966	32.6249	2.21804	26.7596	26.7458	0.0799894	Manual Ct		Manual	10	19	Manual	0.387382
36	12 (18-1)	SMA-a	SYBR	Unknown	26.8179	85.2	Auto Tm	30.6522	32.6249	2.21804	26.7596	26.7458	0.0799894	Manual Ct		Manual	10	19	Manual	0.387382
60	12 (18-1)	SMA-a	SYBR	Unknown	26.6597	85.5	Auto Tm	35.0259	32.6249	2.21804	26.7596	26.7458	0.0799894	Manual Ct		Manual	10	19	Manual	0.387382
13	13 (19-1)	SMA-a	SYBR	Unknown	25.6453	85.2	Auto Tm	82.401	90.7439	7.44251	25.5001	25.5336	0.0992192	Manual Ct		Manual	10	19	Manual	0.387382
37	13 (19-1)	SMA-a	SYBR	Unknown	25.4555	85.2	Auto Tm	96.7009	90.7439	7.44251	25.5001	25.5336	0.0992192	Manual Ct		Manual	10	19	Manual	0.387382
61	13 (19-1)	SMA-a	SYBR	Unknown	25.5001	85.4	Auto Tm	93.1298	90.7439	7.44251	25.5001	25.5336	0.0992192	Manual Ct		Manual	10	19	Manual	0.387382
14	14 (20-1)	SMA-a	SYBR	Unknown	26.2183	85.2	Auto Tm	50.8238	45.8361	5.66466	26.3109	26.347	0.150095	Manual Ct		Manual	10	19	Manual	0.387382
38	14 (20-1)	SMA-a	SYBR	Unknown	26.5119	85.2	Auto Tm	39.6775	45.8361	5.66466	26.3109	26.347	0.150095	Manual Ct		Manual	10	19	Manual	0.387382
62	14 (20-1)	SMA-a	SYBR	Unknown	26.3109	85.2	Auto Tm	47.007	45.8361	5.66466	26.3109	26.347	0.150095	Manual Ct		Manual	10	19	Manual	0.387382
15	15 (21-1)	SMA-a	SYBR	Unknown	25.2816	85.1	Auto Tm	111.975	104.476	6.70106	25.3879	25.3654	0.0751322	Manual Ct		Manual	10	19	Manual	0.387382
39	15 (21-1)	SMA-a	SYBR	Unknown	25.3879	85.1	Auto Tm	102.376	104.476	6.70106	25.3879	25.3654	0.0751322	Manual Ct		Manual	10	19	Manual	0.387382
63	15 (21-1)	SMA-a	SYBR	Unknown	25.4267	85.1	Auto Tm	99.076	104.476	6.70106	25.3879	25.3654	0.0751322	Manual Ct		Manual	10	19	Manual	0.387382
16	16 (21-2)	SMA-a	SYBR	Unknown	25.0156	85.1	Auto Tm	140.136	148.483	9.03434	24.9569	24.9484	0.0718038	Manual Ct		Manual	10	19	Manual	0.387382
40	16 (21-2)	SMA-a	SYBR	Unknown	24.8727	85.1	Auto Tm	158.075	148.483	9.03434	24.9569	24.9484	0.0718038	Manual Ct		Manual	10	19	Manual	0.387382
64	16 (21-2)	SMA-a	SYBR	Unknown	24.9569	85.1	Auto Tm	147.238	148.483	9.03434	24.9569	24.9484	0.0718038	Manual Ct		Manual	10	19	Manual	0.387382
17	17 (22-1)	SMA-a	SYBR	Unknown	26.1165	85.1	Auto Tm	55.3778	59.9773	3.98468	25.9793	26.0237	0.0804106	Manual Ct		Manual	10	19	Manual	0.387382
41	17 (22-1)	SMA-a	SYBR	Unknown	25.9793	85.1	Auto Tm	62.1726	59.9773	3.98468	25.9793	26.0237	0.0804106	Manual Ct		Manual	10	19	Manual	0.387382
65	17 (22-1)	SMA-a	SYBR	Unknown	25.9753	85.1	Auto Tm	62.3816	59.9773	3.98468	25.9793	26.0237	0.0804106	Manual Ct		Manual	10	19	Manual	0.387382
18	18 (23-1)	SMA-a	SYBR	Unknown	26.647	85.1	Auto Tm	35.403	34.0847	2.01149	26.6579	26.6935	0.0712244	Manual Ct		Manual	10	19	Manual	0.387382
42	18 (23-1)	SMA-a	SYBR	Unknown	26.7755	85.1	Auto Tm	31.7695	34.0847	2.01149	26.6579	26.6935	0.0712244	Manual Ct		Manual	10	19	Manual	0.387382
66	18 (23-1)	SMA-a	SYBR	Unknown	26.6579	85.1	Auto Tm	35.0818	34.0847	2.01149	26.6579	26.6935	0.0712244	Manual Ct		Manual	10	19	Manual	0.387382
19	19 (23-2)	SMA-a	SYBR	Unknown	26.163	85.1	Auto Tm	53.2513	53.2568	0.565177	26.163	26.1629	0.0125839	Manual Ct		Manual	10	19	Manual	0.387382
43	19 (23-2)	SMA-a	SYBR	Unknown	26.1503	85.1	Auto Tm	53.8246	53.2568	0.565177	26.163	26.1629	0.0125839	Manual Ct		Manual	10	19	Manual	0.387382
67	19 (23-2)	SMA-a	SYBR	Unknown	26.1754	85.1	Auto Tm	52.6943	53.2568	0.565177	26.163	26.1629	0.0125839	Manual Ct		Manual	10	19	Manual	0.387382
2	2 (11-2)	SMA-a	SYBR	Unknown	26.0846	84.7	Auto Tm	56.8876	53.944	3.07661	26.1421	26.1489	0.067949	Manual Ct		Manual	10	19	Manual	0.387382
26	2 (11-2)	SMA-a	SYBR	Unknown	26.1421	84.7	Auto Tm	54.1949	53.944	3.07661	26.1421	26.1489	0.067949	Manual Ct		Manual	10	19	Manual	0.387382
50	2 (11-2)	SMA-a	SYBR	Unknown	26.22	84.7	Auto Tm	50.7497	53.944	3.07661	26.1421	26.1489	0.067949	Manual Ct		Manual	10	19	Manual	0.387382
20	20 (24-1)	SMA-a	SYBR	Unknown	26.4634	85.1	Auto Tm	41.334	41.5987	2.2803	26.4634	26.457	0.064769	Manual Ct		Manual	10	19	Manual	0.387382
44	20 (24-1)	SMA-a	SYBR	Unknown	26.3893	85.1	Auto Tm	43.9998	41.5987	2.2803	26.4634	26.457	0.064769	Manual Ct		Manual	10	19	Manual	0.387382
68	20 (24-1)	SMA-a	SYBR	Unknown	26.5183	85.1	Auto Tm	39.4624	41.5987	2.2803	26.4634	26.457	0.064769	Manual Ct		Manual	10	19	Manual	0.387382
21	21 (24-2)	SMA-a	SYBR	Unknown	26.9684	84.8	Auto Tm	26.9983	26.1818	1.2093	26.9792	27.0057	0.0555097	Manual Ct		Manual	10	19	Manual	0.387382
45	21 (24-2)	SMA-a	SYBR	Unknown	26.9792	84.8	Auto Tm	26.7546	26.1818	1.2093	26.9792	27.0057	0.0555097	Manual Ct		Manual	10	19	Manual	0.387382
69	21 (24-2)	SMA-a	SYBR	Unknown	27.0695	85.1	Auto Tm	24.7925	26.1818	1.2093	26.9792	27.0057	0.0555097	Manual Ct		Manual	10	19	Manual	0.387382
22	22 (25-2)	SMA-a	SYBR	Unknown	26.8985	84.8	Auto Tm	28.6373	26.2405	2.17183	27.0278	27.0049	0.0969156	Manual Ct		Manual	10	19	Manual	0.387382
46	22 (25-2)	SMA-a	SYBR	Unknown	27.0278	84.8	Auto Tm	25.681	26.2405	2.17183	27.0278	27.0049	0.0969156	Manual Ct		Manual	10	19	Manual	0.387382
70	22 (25-2)	SMA-a	SYBR	Unknown	27.0883	84.8	Auto Tm	24.4032	26.2405	2.17183	27.0278	27.0049	0.0969156	Manual Ct		Manual	10	19	Manual	0.387382
23	23 (26-1)	SMA-a	SYBR	Unknown	26.5336	84.8	Auto Tm	38.9569	38.3142	1.35433	26.5336	26.5538	0.0423433	Manual Ct		Manual	10	19	Manual	0.387382
47	23 (26-1)	SMA-a	SYBR	Unknown	26.5254	84.8	Auto Tm	39.2276	38.3142	1.35433	26.5336	26.5538	0.0423433	Manual Ct		Manual	10	19	Manual	0.387382
71	23 (26-1)	SMA-a	SYBR	Unknown	26.6025	84.8	Auto Tm	36.7582	38.3142	1.35433	26.5336	26.5538	0.0423433	Manual Ct		Manual	10	19	Manual	0.387382
24	24 (26-2)	SMA-a	SYBR	Unknown	26.7514	84.8	Auto Tm	32.4196	34.8085	3.3785	26.6699	26.6699	0.115277	Manual Ct		Manual	10	19	Manual	0.387382
72	24 (26-2)	SMA-a	SYBR	Unknown	26.5884	84.8	Auto Tm	37.1975	34.8085	3.3785	26.6699	26.6699	0.115277	Manual Ct		Manual	10	19	Manual	0.387382
72	24 (26-2)	SMA-a	SYBR	Unknown	26.5884	84.8	Auto Tm	37.1975	34.8085	3.3785	26.6699	26.6699	0.115277	Manual Ct		Manual	10	19	Manual	0.387382
73	25 (27-1)	SMA-a	SYBR	Unknown	26.3485	84.7	Auto Tm	45.5374	41.0047	4.03113	26.5125	26.4766	0.114399	Manual Ct		Manual	10	19	Manual	0.387382
97	25 (27-1)	SMA-a	SYBR	Unknown	26.5687	84.7	Auto Tm	37.8214	41.0047	4.03113	26.5125	26.4766	0.114399	Manual Ct		Manual	10	19	Manual	0.387382
121	25 (27-1)	SMA-a	SYBR	Unknown	26.5125	85	Auto Tm	39.6552	41.0047	4.03113	26.5125	26.4766	0.114399	Manual Ct		Manual	10	19	Manual	0.387382
74	26 (27-2)	SMA-a	SYBR	Unknown	26.8223	84.7	Auto Tm	30.5379	30.2391	0.474485	26.8243	26.8341	0.0186918	Manual Ct		Manual	10	19	Manual	0.387382
98	26 (27-2)	SMA-a	SYBR	Unknown	26.8557	85	Auto Tm	29.692	30.2391	0.474485	26.8243	26.8341	0.0186918	Manual Ct		Manual	10	19	Manual	0.387382
122	26 (27-2)	SMA-a	SYBR	Unknown	26.8243	85	Auto Tm	30.4874	30.2391	0.474485	26.8243	26.8341	0.0186918	Manual Ct		Manual	10	19	Manual	0.387382
75	27 (27-3)	SMA-a	SYBR	Unknown	26.7108	85	Auto Tm	33.5497	32.5037	3.64587	26.7108	26.7535	0.136588	Manual Ct		Manual	10	19	Manual	0.387382
99	27 (27-3)	SMA-a	SYBR	Unknown	26.9064	85	Auto Tm	28.4492	32.5037	3.64587	26.7108	26.7535	0.136588	Manual Ct		Manual	10	19	Manual	0.387382
123	27 (27-3)	SMA-a	SYBR	Unknown	26.6434	85	Auto Tm	35.5122	32.5037	3.64587	26.7108	26.7535	0.136588	Manual Ct		Manual	10	19	Manual	0.387382
76	28 (28-1)	SMA-a	SYBR	Unknown	27.3716	85	Auto Tm	19.2175	22.5637	2.99357	27.1337	27.1885	0.162745	Manual Ct		Manual	10	19	Manual	0.387382
100	28 (28-1)	SMA-a	SYBR	Unknown	27.1337	85	Auto Tm	23.4861	22.5637	2.99357	27.1337	27.1885	0.162745	Manual Ct		Manual	10	19	Manual	0.387382
124	28 (28-1)	SMA-a	SYBR	Unknown	27.0602	85	Auto Tm	24.9875	22.5637	2.99357	27.1337	27.1885	0.162745	Manual Ct		Manual	10	19	Manual	0.387382
77	29 (28-2)	SMA-a	SYBR	Unknown	27.4919	85	Auto Tm	17.3632	17.3192	0.506023	27.4919	27.4952	0.0347236	Manual Ct		Manual	10	19	Manual	0.387382
101	29 (28-2)	SMA-a	SYBR	Unknown	27.4623	85	Auto Tm	17.8018	17.3192	0.506023	27.4919	27.4952	0.0347236	Manual Ct		Manual	10	19	Manual	0.387382
125	29 (28-2)	SMA-a	SYBR	Unknown	27.5315	85	Auto Tm	16.7926	17.3192	0.506023	27.4919	27.4952	0.0347236	Manual Ct		Manual	10	19	Manual	0.387382
3	3 (12-1)	SMA-a	SYBR	Unknown	26.4062	84.7	Auto Tm	43.3759	50.106	7.86617	26.2814	26.2447	0.182716	Manual Ct		Manual	10	19	Manual	0.387382
27	3 (12-1)	SMA-a	SYBR	Unknown	26.2814	85	Auto Tm	48.1883	50.106	7.86617	26.2814	26.2447	0.182716	Manual Ct		Manual	10	19	Manual	0.387382
51	3 (12-1)	SMA-a	SYBR	Unknown	26.0464	85	Auto Tm	58.7537	50.106	7.86617	26.2814	26.2447	0.182716	Manual Ct		Manual	10	19	Manual	0.387382
78	30 (28-3)	SMA-a	SYBR	Unknown	27.0791	85	Auto Tm	24.5927	25.8921	1.34333	27.0219	27.0191	0.0614355	Manual Ct		Manual	10	19	Manual	0.387382
102	30 (28-3)	SMA-a	SYBR	Unknown	26.9563	85.2	Auto Tm	27.2755	25.8921	1.34333	27.0219	27.0191	0.0614355	Manual Ct		Manual	10	19	Manual	0.387382
126	30 (28-3)	SMA-a	SYBR	Unknown	27.0219	85.2	Auto Tm	25.8082	25.8921	1.34333	27.0219	27.0191	0.0614355	Manual Ct		Manual	10	19	Manual	0.387382
79	31 (29-1)	SMA-a	SYBR	Unknown	23.1779	85.2	Auto Tm	660.039	658.267	29.0564	23.1779	23.1819	0.0524871	Manual Ct		Manual	10	19	Manual	0.387382
103	31 (29-1)	SMA-a	SYBR	Unknown	23.2362	85.2	Auto Tm	628.364	658.267	29.0564	23.1779	23.1819	0.0524871	Manual Ct		Manual	10	19	Manual	0.387382
127	31 (29-1)	SMA-a	SYBR	Unknown	23.1315	85.2	Auto Tm	686.396	658.267	29.0564	23.1779	23.1819	0.0524871	Manual Ct		Manual	10	19	Manual	0.387382
80	32 (29-2)	SMA-a	SYBR	Unknown	24.8684	85.2	Auto Tm	158.648	166.565	6.86923	24.7857	24.8114	0.0495054	Manual Ct		Manual	10	19	Manual	0.387382
104	32 (29-2)	SMA-a	SYBR	Unknown	24.7857	85.2	Auto Tm	170.109	166.565	6.86923	24.7857	24.8114	0.0495054	Manual Ct		Manual	10	19	Manual	0.387382
128	32 (29-2)	SMA-a	SYBR	Unknown	24.7799	85.2	Auto Tm	170.939	166.565	6.86923	24.7857	24.8114	0.0495054	Manual Ct		Manual	10	19	Manual	0.387382
81	33 (30-1)	SMA-a	SYBR	Unknown	26.4604	85.2	Auto Tm	41.4383	43.4286	2.81473	26.406	26.406	0.0769109	Manual Ct		Manual	10	19	Manual	0.387382
129	33 (30-1)	SMA-a	SYBR	Unknown	26.3516	85.2	Auto Tm	45.4189	43.4286	2.81473	26.406	26.406	0.0769109	Manual Ct		Manual	10	19	Manual	0.387382
129	33 (30-1)	SMA-a	SYBR	Unknown	26.3516	85.2	Auto Tm	45.4189	43.4286	2.81473	26.406	26.406	0.0769109	Manual Ct		Manual	10	19	Manual	0.387382
82	34 (30-2)	SMA-a	SYBR	Unknown	24.2647	85.2	Auto Tm	263.953	266.885	17.4475	24.2647	24.2533	0.077022	Manual Ct		Manual	10	19	Manual	0.387382
106	34 (30-2)	SMA-a	SYBR	Unknown	24.324	85.2	Auto Tm	251.09	266.885	17.4475	24.2647	24.2533	0.077022	Manual Ct		Manual	10	19	Manual	0.387382
130	34 (30-2)	SMA-a	SYBR	Unknown	24.1712	85.2	Auto Tm	285.613	266.885	17.4475	24.2647	24.2533	0.077022	Manual Ct		Manual	10	19	Manual	0.387382
83	35 (31-1)	SMA-a	SYBR	Unknown	25.6263	85.2	Auto Tm	83.7292	79.4499	7.4211	25.6263	25.6921	0.114096	Manual Ct		Manual	10	19	Manual	0.387382
107	35 (31-1)	SMA-a	SYBR	Unknown	25.8238	85.2	Auto Tm	70.8807	79.4499	7.4211	25.6263	25.6921	0.114096	Manual Ct		Manual	10	19	Manual	0.387382
131	35 (31-1)	SMA-a	SYBR	Unknown	25.6261	85.5	Auto Tm	83.7397	79.4499	7.4211	25.6263	25.6921	0.114096	Manual Ct		Manual	10	19	Manual	0.387382
84	36 (31-2)	SMA-a	SYBR	Unknown	24.1862	85.5	Auto Tm	282.04	281.311	21.3468	24.1862	24.1915	0.0903551	Manual Ct		Manual	10	19	Manual	0.387382
108	36 (31-2)	SMA-a	SYBR	Unknown	24.104	85.5	Auto Tm	302.283	281.311	21.3468	24.1862	24.1915	0.0903551	Manual Ct		Manual	10	19	Manual	0.387382
132	36 (31-2)	SMA-a	SYBR	Unknown	24.2844	85.5	Auto Tm	259.608	281.311	21.3468	24.1862	24.1915	0.0903551	Manual Ct		Manual	10	19	Manual	0.387382
85	37 (32-1)	SMA-a	SYBR	Unknown	25.6878	85.4	Auto Tm	79.5004	72.9939	5.91331	25.813	25.7916	0.0949328	Manual Ct		Manual	10	19	Manual	0.387382
109	37 (32-1)	SMA-a	SYBR	Unknown	25.874	85.4	Auto Tm	67.9471	72.9939	5.91331	25.813	25.7916	0.0949328	Manual Ct		Manual	10	19	Manual	0.387382
133	37 (32-1)	SMA-a	SYBR	Unknown	25.813	85.4	Auto Tm	71.5343	72.9939	5.91331	25.813	25.7916	0.0949328	Manual Ct		Manual	10	19	Manual	0.387382
86	38 (A)	SMA-a	SYBR	Unknown	26.1555	85.4	Auto Tm	53.586	51.3361	7.4947	26.1555	26.2153	0.179717	Manual Ct		Manual	10	19	Manual	0.387382
110	38 (A)	SMA-a	SYBR	Unknown	26.4172	85.4	Auto Tm	42.9742	51.3361	7.4947	26.1555	26.2153	0.179717	Manual Ct		Manual	10	19	Manual	0.387382
134	38 (A)	SMA-a	SYBR	Unknown	26.073	85.4	Auto Tm	57.4482	51.3361	7.4947	26.1555	26.2153	0.179717	Manual Ct		Manual	10	19	Manual	0.387382
87	39 (G)	SMA-a	SYBR	Unknown	28.0605	85.1	Auto Tm	10.7495	9.04328	1.91068	28.2194	28.2842	0.262204	Manual Ct		Manual	10	19	Manual	0.387382
111	39 (G)	SMA-a	SYBR	Unknown	28.5727	85.1	Auto Tm	6.97886	9.04328	1.91068	28.2194	28.2842	0.262204	Manual Ct		Manual	10	19	Manual	0.387382
135	39 (G)	SMA-a	SYBR	Unknown	28.2194	85.4	Auto Tm	9.40146	9.04328	1.91068	28.2194	28.2842	0.262204	Manual Ct		Manual	10	19	Manual	0.387382
4	4 (12-2)	SMA-a	SYBR	Unknown	24.7552	85	Auto Tm	174.55	167.344	9.22529	24.7828	24.8064	0.0662669	Manual Ct		Manual	10	19	Manual	0.387382
28	4 (12-2)	SMA-a	SYBR	Unknown	24.8812	85	Auto Tm	156.947	167.344	9.22529	24.7828	24.8064	0.0662669	Manual Ct		Manual	10	19	Manual	0.387382
52	4 (12-2)	SMA-a	SYBR	Unknown	24.7828	85	Auto Tm	170.535	167.344	9.22529	24.7828	24.8064	0.0662669	Manual Ct		Manual	10	19	Manual	0.387382
88	40 (H)	SMA-a	SYBR	Unknown	26.9968	85.1	Auto Tm	26.3597	26.3126	0.1025	26.9968	26.9989	0.0046243	Manual Ct		Manual	10	19	Manual	0.387382
112	40 (H)	SMA-a	SYBR	Unknown	27.0043	85.1	Auto Tm	26.195	26.3126	0.1025	26.9968	26.9989	0.0046243	Manual Ct		Manual	10	19	Manual	0.387382
136	40 (H)	SMA-a	SYBR	Unknown	26.9958	85.1	Auto Tm	26.3831	26.3126	0.1025	26.9968	26.9989	0.0046243	Manual Ct		Manual	10	19	Manual	0.387382
5	5 (13-1)	SMA-a	SYBR	Unknown	26.8492	85	Auto Tm	29.8549	29.5071	4.65874	26.8492	26.8732	0.190675	Manual Ct		Manual	10	19	Manual	0.387382
29	5 (13-1)	SMA-a	SYBR	Unknown	27.0747	85	Auto Tm	24.6842	29.5071	4.65874	26.8492	26.8732	0.190675	Manual Ct		Manual	10	19	Manual	0.387382
53	5 (13-1)	SMA-a	SYBR	Unknown	26.6956	85	Auto Tm	33.9821	29.5071	4.65874	26.8492	26.8732	0.190675	Manual Ct		Manual	10	19	Manual	0.387382
6	6 (14-1)	SMA-a	SYBR	Unknown	27.1089	85	Auto Tm	23.9833	23.4288	3.37735	27.1089	27.1451	0.175268	Manual Ct		Manual	10	19	Manual	0.387382
30	6 (14-1)	SMA-a	SYBR	Unknown	26.9908	85	Auto Tm	26.4946	23.4288	3.37735	27.1089	27.1451	0.175268	Manual Ct		Manual	10	19	Manual	0.387382
54	6 (14-1)	SMA-a	SYBR	Unknown	27.3356	85	Auto Tm	19.8085	23.4288	3.37735	27.1089	27.1451	0.175268	Manual Ct		Manual	10	19	Manual	0.387382
7	7 (15-1)	SMA-a	SYBR	Unknown	24.0853	85	Auto Tm	307.066	385.702	80.0688	23.8236	23.8323	0.248868	Manual Ct		Manual	10	19	Manual	0.387382
31	7 (15-1)	SMA-a	SYBR	Unknown	23.5878	85.2	Auto Tm	467.131	385.702	80.0688	23.8236	23.8323	0.248868	Manual Ct		Manual	10	19	Manual	0.387382
55	7 (15-1)	SMA-a	SYBR	Unknown	23.8236	85.2	Auto Tm	382.908	385.702	80.0688	23.8236	23.8323	0.248868	Manual Ct		Manual	10	19	Manual	0.387382
8	8 (15-2)	SMA-a	SYBR	Unknown	26.7767	85	Auto Tm	31.7361	42.2639	10.0209	26.4064	26.4605	0.292956	Manual Ct		Manual	10	19	Manual	0.387382
32	8 (15-2)	SMA-a	SYBR	Unknown	26.1983	85.2	Auto Tm	51.6863	42.2639	10.0209	26.4064	26.4605	0.292956	Manual Ct		Manual	10	19	Manual	0.387382
56	8 (15-2)	SMA-a	SYBR	Unknown	26.4064	85.2	Auto Tm	43.3693	42.2639	10.0209	26.4064	26.4605	0.292956	Manual Ct		Manual	10	19	Manual	0.387382
9	9 (16-1)	SMA-a	SYBR	Unknown	26.0036	85.2	Auto Tm	60.9093	59.0873	2.7395	26.0133	26.0405	0.0557294	Manual Ct		Manual	10	19	Manual	0.387382
33	9 (16-1)	SMA-a	SYBR	Unknown	26.0133	85.2	Auto Tm	60.4157	59.0873	2.7395	26.0133	26.0405	0.0557294	Manual Ct		Manual	10	19	Manual	0.387382
57	9 (16-1)	SMA-a	SYBR	Unknown	26.1046	85.2	Auto Tm	55.9368	59.0873	2.7395	26.0133	26.0405	0.0557294	Manual Ct		Manual	10	19	Manual	0.387382
365	Gene 1 Standard (1)	SMA-a	SYBR	Standard	30.9285	84.5	Auto Tm	1						Manual Ct		Manual	10	19	Manual	0.387382
366	Gene 1 Standard (1)	SMA-a	SYBR	Standard	31.0511	84.7	Auto Tm	1						Manual Ct		Manual	10	19	Manual	0.387382
363	Gene 1 Standard (10)	SMA-a	SYBR	Standard	28.1232	84.7	Auto Tm	10						Manual Ct		Manual	10	19	Manual	0.387382
364	Gene 1 Standard (10)	SMA-a	SYBR	Standard	27.7166	84.7	Auto Tm	10						Manual Ct		Manual	10	19	Manual	0.387382
361	Gene 1 Standard (100)	SMA-a	SYBR	Standard	25.5858	85.3	Auto Tm	100						Manual Ct		Manual	10	19	Manual	0.387382
362	Gene 1 Standard (100)	SMA-a	SYBR	Standard	25.4719	85.3	Auto Tm	100						Manual Ct		Manual	10	19	Manual	0.387382
379	NTC Gene 1	SMA-a	SYBR	NTC	Undetermined	64.3	Auto Tm	0						Manual Ct		Manual	10	19	Manual	0.387382						TRUE
382	RT Negative 1	SMA-a	SYBR	NTC	29.4153	85.6	Auto Tm	3.42937						Manual Ct		Manual	10	19	Manual	0.387382
Slope	-2.73047	cycles/log decade
Y-Intercept		30.8767
R^2		0.991676
Well	Sample Name	Detector Name	Reporter	Task	Ct	Tm Value	Tm Type	Quantity	Qty Mean	Qty StdDev	Ct Median	Ct Mean	Ct StdDev	Ct Type	Template Name	Baseline Type	Baseline Start	Baseline Stop	Threshold Type	Threshold	FOS	HMD	LME	EW	BPR	NAW	HNS	HRN	EAF	BAF	TAF	CAF
89	1 (11-1)	TNF alpha	SYBR	Unknown	30.7789	83.3	Auto Tm	38.6283	45.9513	6.34524	30.4546	30.5591	0.190439	Manual Ct		Manual	19	21	Manual	0.455748
113	1 (11-1)	TNF alpha	SYBR	Unknown	30.4437	83.3	Auto Tm	49.8164	45.9513	6.34524	30.4546	30.5591	0.190439	Manual Ct		Manual	19	21	Manual	0.455748
137	1 (11-1)	TNF alpha	SYBR	Unknown	30.4546	83.3	Auto Tm	49.4094	45.9513	6.34524	30.4546	30.5591	0.190439	Manual Ct		Manual	19	21	Manual	0.455748
146	10 (17-1)	TNF alpha	SYBR	Unknown	29.1567	83.1	Auto Tm	132.315	117.616	24.559	29.1672	29.3331	0.296414	Manual Ct		Manual	19	21	Manual	0.455748
170	10 (17-1)	TNF alpha	SYBR	Unknown	29.6753	83.1	Auto Tm	89.2638	117.616	24.559	29.1672	29.3331	0.296414	Manual Ct		Manual	19	21	Manual	0.455748
194	10 (17-1)	TNF alpha	SYBR	Unknown	29.1672	83.1	Auto Tm	131.269	117.616	24.559	29.1672	29.3331	0.296414	Manual Ct		Manual	19	21	Manual	0.455748
147	11 (17-2)	TNF alpha	SYBR	Unknown	27.8744	83.1	Auto Tm	350.205	339.658	14.9147	27.9153	27.9153	0.0578713	Manual Ct		Manual	19	21	Manual	0.455748
195	11 (17-2)	TNF alpha	SYBR	Unknown	27.9562	83.1	Auto Tm	329.112	339.658	14.9147	27.9153	27.9153	0.0578713	Manual Ct		Manual	19	21	Manual	0.455748
195	11 (17-2)	TNF alpha	SYBR	Unknown	27.9562	83.1	Auto Tm	329.112	339.658	14.9147	27.9153	27.9153	0.0578713	Manual Ct		Manual	19	21	Manual	0.455748
148	12 (18-1)	TNF alpha	SYBR	Unknown	30.3278	83.1	Auto Tm	54.3974	38.6328	13.9067	30.9706	30.8321	0.451268	Manual Ct		Manual	19	21	Manual	0.455748
172	12 (18-1)	TNF alpha	SYBR	Unknown	31.1979	83.1	Auto Tm	28.1041	38.6328	13.9067	30.9706	30.8321	0.451268	Manual Ct		Manual	19	21	Manual	0.455748
196	12 (18-1)	TNF alpha	SYBR	Unknown	30.9706	83.1	Auto Tm	33.3969	38.6328	13.9067	30.9706	30.8321	0.451268	Manual Ct		Manual	19	21	Manual	0.455748
149	13 (19-1)	TNF alpha	SYBR	Unknown	29.4621	83.1	Auto Tm	104.941	92.6071	18.1221	29.5115	29.6453	0.275528	Manual Ct		Manual	19	21	Manual	0.455748
173	13 (19-1)	TNF alpha	SYBR	Unknown	29.5115	83.1	Auto Tm	101.08	92.6071	18.1221	29.5115	29.6453	0.275528	Manual Ct		Manual	19	21	Manual	0.455748
197	13 (19-1)	TNF alpha	SYBR	Unknown	29.9621	83.1	Auto Tm	71.8005	92.6071	18.1221	29.5115	29.6453	0.275528	Manual Ct		Manual	19	21	Manual	0.455748
150	14 (20-1)	TNF alpha	SYBR	Unknown	29.6363	83.1	Auto Tm	91.9479	76.1695	14.2847	29.9504	29.8993	0.241574	Manual Ct		Manual	19	21	Manual	0.455748
174	14 (20-1)	TNF alpha	SYBR	Unknown	30.1112	83.1	Auto Tm	64.1169	76.1695	14.2847	29.9504	29.8993	0.241574	Manual Ct		Manual	19	21	Manual	0.455748
198	14 (20-1)	TNF alpha	SYBR	Unknown	29.9504	83.4	Auto Tm	72.4437	76.1695	14.2847	29.9504	29.8993	0.241574	Manual Ct		Manual	19	21	Manual	0.455748
151	15 (21-1)	TNF alpha	SYBR	Unknown	30.999	83.1	Auto Tm	32.6845	37.103	5.60946	30.9009	30.8416	0.193926	Manual Ct		Manual	19	21	Manual	0.455748
175	15 (21-1)	TNF alpha	SYBR	Unknown	30.625	83.4	Auto Tm	43.4139	37.103	5.60946	30.9009	30.8416	0.193926	Manual Ct		Manual	19	21	Manual	0.455748
199	15 (21-1)	TNF alpha	SYBR	Unknown	30.9009	83.4	Auto Tm	35.2105	37.103	5.60946	30.9009	30.8416	0.193926	Manual Ct		Manual	19	21	Manual	0.455748
152	16 (21-2)	TNF alpha	SYBR	Unknown	30.608	83.4	Auto Tm	43.9779	46.6977	3.39668	30.56	30.5312	0.0945026	Manual Ct		Manual	19	21	Manual	0.455748
176	16 (21-2)	TNF alpha	SYBR	Unknown	30.4257	83.4	Auto Tm	50.505	46.6977	3.39668	30.56	30.5312	0.0945026	Manual Ct		Manual	19	21	Manual	0.455748
200	16 (21-2)	TNF alpha	SYBR	Unknown	30.56	83.4	Auto Tm	45.6103	46.6977	3.39668	30.56	30.5312	0.0945026	Manual Ct		Manual	19	21	Manual	0.455748
153	17 (22-1)	TNF alpha	SYBR	Unknown	31.3128	83.3	Auto Tm	25.7581	23.4322	4.20446	31.3128	31.4528	0.251554	Manual Ct		Manual	19	21	Manual	0.455748
177	17 (22-1)	TNF alpha	SYBR	Unknown	31.3025	83.3	Auto Tm	25.9597	23.4322	4.20446	31.3128	31.4528	0.251554	Manual Ct		Manual	19	21	Manual	0.455748
201	17 (22-1)	TNF alpha	SYBR	Unknown	31.7432	83.3	Auto Tm	18.5787	23.4322	4.20446	31.3128	31.4528	0.251554	Manual Ct		Manual	19	21	Manual	0.455748
154	18 (23-1)	TNF alpha	SYBR	Unknown	30.575	83.3	Auto Tm	45.0927	36.947	9.4536	30.7606	30.869	0.360601	Manual Ct		Manual	19	21	Manual	0.455748
178	18 (23-1)	TNF alpha	SYBR	Unknown	30.7606	83.3	Auto Tm	39.1676	36.947	9.4536	30.7606	30.869	0.360601	Manual Ct		Manual	19	21	Manual	0.455748
202	18 (23-1)	TNF alpha	SYBR	Unknown	31.2713	83.3	Auto Tm	26.5808	36.947	9.4536	30.7606	30.869	0.360601	Manual Ct		Manual	19	21	Manual	0.455748
155	19 (23-2)	TNF alpha	SYBR	Unknown	30.5269	83.3	Auto Tm	46.7705	51.8546	8.66145	30.5222	30.4025	0.211297	Manual Ct		Manual	19	21	Manual	0.455748
179	19 (23-2)	TNF alpha	SYBR	Unknown	30.5222	83.3	Auto Tm	46.9377	51.8546	8.66145	30.5222	30.4025	0.211297	Manual Ct		Manual	19	21	Manual	0.455748
203	19 (23-2)	TNF alpha	SYBR	Unknown	30.1586	83.6	Auto Tm	61.8555	51.8546	8.66145	30.5222	30.4025	0.211297	Manual Ct		Manual	19	21	Manual	0.455748
90	2 (11-2)	TNF alpha	SYBR	Unknown	30.2667	83.2	Auto Tm	56.9801	54.1175	5.19795	30.2667	30.3389	0.130463	Manual Ct		Manual	19	21	Manual	0.455748
114	2 (11-2)	TNF alpha	SYBR	Unknown	30.2604	83.2	Auto Tm	57.2549	54.1175	5.19795	30.2667	30.3389	0.130463	Manual Ct		Manual	19	21	Manual	0.455748
138	2 (11-2)	TNF alpha	SYBR	Unknown	30.4895	83.2	Auto Tm	48.1175	54.1175	5.19795	30.2667	30.3389	0.130463	Manual Ct		Manual	19	21	Manual	0.455748
156	20 (24-1)	TNF alpha	SYBR	Unknown	31.0807	83.3	Auto Tm	30.7193	29.3596	5.65474	31.0807	31.1577	0.265795	Manual Ct		Manual	19	21	Manual	0.455748
180	20 (24-1)	TNF alpha	SYBR	Unknown	30.9389	83.3	Auto Tm	34.2105	29.3596	5.65474	31.0807	31.1577	0.265795	Manual Ct		Manual	19	21	Manual	0.455748
204	20 (24-1)	TNF alpha	SYBR	Unknown	31.4535	83.3	Auto Tm	23.149	29.3596	5.65474	31.0807	31.1577	0.265795	Manual Ct		Manual	19	21	Manual	0.455748
157	21 (24-2)	TNF alpha	SYBR	Unknown	30.6643	83.3	Auto Tm	42.1389	46.5569	9.31131	30.6643	30.5495	0.252125	Manual Ct		Manual	19	21	Manual	0.455748
181	21 (24-2)	TNF alpha	SYBR	Unknown	30.2604	83.3	Auto Tm	57.2548	46.5569	9.31131	30.6643	30.5495	0.252125	Manual Ct		Manual	19	21	Manual	0.455748
205	21 (24-2)	TNF alpha	SYBR	Unknown	30.7238	83.3	Auto Tm	40.2769	46.5569	9.31131	30.6643	30.5495	0.252125	Manual Ct		Manual	19	21	Manual	0.455748
158	22 (25-2)	TNF alpha	SYBR	Unknown	30.004	83.6	Auto Tm	69.555	69.6467	1.76825	30.004	30.0025	0.0334252	Manual Ct		Manual	19	21	Manual	0.455748
182	22 (25-2)	TNF alpha	SYBR	Unknown	29.9684	83.6	Auto Tm	71.459	69.6467	1.76825	30.004	30.0025	0.0334252	Manual Ct		Manual	19	21	Manual	0.455748
206	22 (25-2)	TNF alpha	SYBR	Unknown	30.0352	83.6	Auto Tm	67.9261	69.6467	1.76825	30.004	30.0025	0.0334252	Manual Ct		Manual	19	21	Manual	0.455748
159	23 (26-1)	TNF alpha	SYBR	Unknown	30.3992	83.3	Auto Tm	51.5274	50.2343	9.76037	30.3992	30.4501	0.264658	Manual Ct		Manual	19	21	Manual	0.455748
183	23 (26-1)	TNF alpha	SYBR	Unknown	30.7365	83.3	Auto Tm	39.8919	50.2343	9.76037	30.3992	30.4501	0.264658	Manual Ct		Manual	19	21	Manual	0.455748
207	23 (26-1)	TNF alpha	SYBR	Unknown	30.2145	83.6	Auto Tm	59.2837	50.2343	9.76037	30.3992	30.4501	0.264658	Manual Ct		Manual	19	21	Manual	0.455748
160	24 (26-2)	TNF alpha	SYBR	Unknown	31.0025	83.3	Auto Tm	32.5967	32.179	3.2698	31.0025	31.0241	0.135684	Manual Ct		Manual	19	21	Manual	0.455748
184	24 (26-2)	TNF alpha	SYBR	Unknown	31.1693	83.3	Auto Tm	28.7204	32.179	3.2698	31.0025	31.0241	0.135684	Manual Ct		Manual	19	21	Manual	0.455748
208	24 (26-2)	TNF alpha	SYBR	Unknown	30.9006	83.3	Auto Tm	35.2199	32.179	3.2698	31.0025	31.0241	0.135684	Manual Ct		Manual	19	21	Manual	0.455748
161	25 (27-1)	TNF alpha	SYBR	Unknown	30.6238	83.3	Auto Tm	43.4531	43.2132	0.53826	30.6238	30.6312	0.0164663	Manual Ct		Manual	19	21	Manual	0.455748
185	25 (27-1)	TNF alpha	SYBR	Unknown	30.65	83.3	Auto Tm	42.5967	43.2132	0.53826	30.6238	30.6312	0.0164663	Manual Ct		Manual	19	21	Manual	0.455748
209	25 (27-1)	TNF alpha	SYBR	Unknown	30.6197	83.3	Auto Tm	43.5898	43.2132	0.53826	30.6238	30.6312	0.0164663	Manual Ct		Manual	19	21	Manual	0.455748
162	26 (27-2)	TNF alpha	SYBR	Unknown	30.9621	83.2	Auto Tm	33.6122	34.3186	10.0739	30.9621	30.9734	0.393502	Manual Ct		Manual	19	21	Manual	0.455748
186	26 (27-2)	TNF alpha	SYBR	Unknown	30.5857	83.2	Auto Tm	44.7272	34.3186	10.0739	30.9621	30.9734	0.393502	Manual Ct		Manual	19	21	Manual	0.455748
210	26 (27-2)	TNF alpha	SYBR	Unknown	31.3725	83.2	Auto Tm	24.6166	34.3186	10.0739	30.9621	30.9734	0.393502	Manual Ct		Manual	19	21	Manual	0.455748
163	27 (27-3)	TNF alpha	SYBR	Unknown	31.4791	83.2	Auto Tm	22.7027	21.5399	6.84326	31.4791	31.5977	0.45309	Manual Ct		Manual	19	21	Manual	0.455748
187	27 (27-3)	TNF alpha	SYBR	Unknown	31.2157	83.2	Auto Tm	27.7273	21.5399	6.84326	31.4791	31.5977	0.45309	Manual Ct		Manual	19	21	Manual	0.455748
211	27 (27-3)	TNF alpha	SYBR	Unknown	32.0983	83.2	Auto Tm	14.1898	21.5399	6.84326	31.4791	31.5977	0.45309	Manual Ct		Manual	19	21	Manual	0.455748
164	28 (28-1)	TNF alpha	SYBR	Unknown	31.8815	83.2	Auto Tm	16.7276	17.524	3.32744	31.8815	31.8357	0.245219	Manual Ct		Manual	19	21	Manual	0.455748
188	28 (28-1)	TNF alpha	SYBR	Unknown	32.0547	83.2	Auto Tm	14.667	17.524	3.32744	31.8815	31.8357	0.245219	Manual Ct		Manual	19	21	Manual	0.455748
212	28 (28-1)	TNF alpha	SYBR	Unknown	31.5708	83.2	Auto Tm	21.1773	17.524	3.32744	31.8815	31.8357	0.245219	Manual Ct		Manual	19	21	Manual	0.455748
165	29 (28-2)	TNF alpha	SYBR	Unknown	31.1324	83.2	Auto Tm	29.5375	25.3877	5.67143	31.217	31.3561	0.317024	Manual Ct		Manual	19	21	Manual	0.455748
189	29 (28-2)	TNF alpha	SYBR	Unknown	31.217	83.2	Auto Tm	27.7002	25.3877	5.67143	31.217	31.3561	0.317024	Manual Ct		Manual	19	21	Manual	0.455748
213	29 (28-2)	TNF alpha	SYBR	Unknown	31.7189	83	Auto Tm	18.9254	25.3877	5.67143	31.217	31.3561	0.317024	Manual Ct		Manual	19	21	Manual	0.455748
91	3 (12-1)	TNF alpha	SYBR	Unknown	31.265	83.2	Auto Tm	26.7099	25.1605	2.38851	31.2822	31.3478	0.128824	Manual Ct		Manual	19	21	Manual	0.455748
115	3 (12-1)	TNF alpha	SYBR	Unknown	31.2822	83.2	Auto Tm	26.3618	25.1605	2.38851	31.2822	31.3478	0.128824	Manual Ct		Manual	19	21	Manual	0.455748
139	3 (12-1)	TNF alpha	SYBR	Unknown	31.4962	83.2	Auto Tm	22.4098	25.1605	2.38851	31.2822	31.3478	0.128824	Manual Ct		Manual	19	21	Manual	0.455748
166	30 (28-3)	TNF alpha	SYBR	Unknown	31.9762	83	Auto Tm	15.568	14.1686	2.0719	32.0121	32.1103	0.201974	Manual Ct		Manual	19	21	Manual	0.455748
190	30 (28-3)	TNF alpha	SYBR	Unknown	32.0121	83	Auto Tm	15.1493	14.1686	2.0719	32.0121	32.1103	0.201974	Manual Ct		Manual	19	21	Manual	0.455748
214	30 (28-3)	TNF alpha	SYBR	Unknown	32.3426	83	Auto Tm	11.7884	14.1686	2.0719	32.0121	32.1103	0.201974	Manual Ct		Manual	19	21	Manual	0.455748
167	31 (29-1)	TNF alpha	SYBR	Unknown	28.2731	83.2	Auto Tm	258.753	275.455	27.1607	28.2626	28.1948	0.126631	Manual Ct		Manual	19	21	Manual	0.455748
191	31 (29-1)	TNF alpha	SYBR	Unknown	28.2626	83.2	Auto Tm	260.817	275.455	27.1607	28.2626	28.1948	0.126631	Manual Ct		Manual	19	21	Manual	0.455748
215	31 (29-1)	TNF alpha	SYBR	Unknown	28.0487	83.2	Auto Tm	306.795	275.455	27.1607	28.2626	28.1948	0.126631	Manual Ct		Manual	19	21	Manual	0.455748
168	32 (29-2)	TNF alpha	SYBR	Unknown	30.3497	82.9	Auto Tm	53.5011	56.1421	13.0156	30.3497	30.3094	0.300835	Manual Ct		Manual	19	21	Manual	0.455748
192	32 (29-2)	TNF alpha	SYBR	Unknown	30.588	82.9	Auto Tm	44.6495	56.1421	13.0156	30.3497	30.3094	0.300835	Manual Ct		Manual	19	21	Manual	0.455748
216	32 (29-2)	TNF alpha	SYBR	Unknown	29.9904	82.9	Auto Tm	70.2756	56.1421	13.0156	30.3497	30.3094	0.300835	Manual Ct		Manual	19	21	Manual	0.455748
217	33 (30-1)	TNF alpha	SYBR	Unknown	30.9414	83.1	Auto Tm	34.1457	42.5307	10.3318	30.7537	30.6769	0.310033	Manual Ct		Manual	19	21	Manual	0.455748
241	33 (30-1)	TNF alpha	SYBR	Unknown	30.3357	82.9	Auto Tm	54.0727	42.5307	10.3318	30.7537	30.6769	0.310033	Manual Ct		Manual	19	21	Manual	0.455748
265	33 (30-1)	TNF alpha	SYBR	Unknown	30.7537	82.9	Auto Tm	39.3738	42.5307	10.3318	30.7537	30.6769	0.310033	Manual Ct		Manual	19	21	Manual	0.455748
218	34 (30-2)	TNF alpha	SYBR	Unknown	28.4377	83.1	Auto Tm	228.37	206.442	32.8015	28.4736	28.5826	0.220572	Manual Ct		Manual	19	21	Manual	0.455748
242	34 (30-2)	TNF alpha	SYBR	Unknown	28.8364	83.1	Auto Tm	168.733	206.442	32.8015	28.4736	28.5826	0.220572	Manual Ct		Manual	19	21	Manual	0.455748
266	34 (30-2)	TNF alpha	SYBR	Unknown	28.4736	83.1	Auto Tm	222.224	206.442	32.8015	28.4736	28.5826	0.220572	Manual Ct		Manual	19	21	Manual	0.455748
219	35 (31-1)	TNF alpha	SYBR	Unknown	28.8235	83.1	Auto Tm	170.394	156.902	12.842	28.9441	28.9351	0.107378	Manual Ct		Manual	19	21	Manual	0.455748
243	35 (31-1)	TNF alpha	SYBR	Unknown	29.0377	83.1	Auto Tm	144.828	156.902	12.842	28.9441	28.9351	0.107378	Manual Ct		Manual	19	21	Manual	0.455748
267	35 (31-1)	TNF alpha	SYBR	Unknown	28.9441	83.1	Auto Tm	155.486	156.902	12.842	28.9441	28.9351	0.107378	Manual Ct		Manual	19	21	Manual	0.455748
220	36 (31-2)	TNF alpha	SYBR	Unknown	30.2376	83.1	Auto Tm	58.2526	80.04	21.8754	29.8219	29.853	0.370022	Manual Ct		Manual	19	21	Manual	0.455748
244	36 (31-2)	TNF alpha	SYBR	Unknown	29.8219	83.1	Auto Tm	79.8649	80.04	21.8754	29.8219	29.853	0.370022	Manual Ct		Manual	19	21	Manual	0.455748
268	36 (31-2)	TNF alpha	SYBR	Unknown	29.4995	83.1	Auto Tm	102.002	80.04	21.8754	29.8219	29.853	0.370022	Manual Ct		Manual	19	21	Manual	0.455748
221	37 (32-1)	TNF alpha	SYBR	Unknown	31.7402	83.1	Auto Tm	18.6216	24.6624	8.00834	31.5435	31.4135	0.407519	Manual Ct		Manual	19	21	Manual	0.455748
245	37 (32-1)	TNF alpha	SYBR	Unknown	31.5435	83.1	Auto Tm	21.6193	24.6624	8.00834	31.5435	31.4135	0.407519	Manual Ct		Manual	19	21	Manual	0.455748
269	37 (32-1)	TNF alpha	SYBR	Unknown	30.9569	83.1	Auto Tm	33.7462	24.6624	8.00834	31.5435	31.4135	0.407519	Manual Ct		Manual	19	21	Manual	0.455748
222	38 (A)	TNF alpha	SYBR	Unknown	31.1911	83.4	Auto Tm	28.2502	28.1512	0.140139	31.1957	31.1957	0.00655872	Manual Ct		Manual	19	21	Manual	0.455748
270	38 (A)	TNF alpha	SYBR	Unknown	31.2004	83.1	Auto Tm	28.0521	28.1512	0.140139	31.1957	31.1957	0.00655872	Manual Ct		Manual	19	21	Manual	0.455748
270	38 (A)	TNF alpha	SYBR	Unknown	31.2004	83.1	Auto Tm	28.0521	28.1512	0.140139	31.1957	31.1957	0.00655872	Manual Ct		Manual	19	21	Manual	0.455748
223	39 (G)	TNF alpha	SYBR	Unknown	31.2933	83.4	Auto Tm	26.1417	18.8882	6.43797	31.886	31.7698	0.430321	Manual Ct		Manual	19	21	Manual	0.455748
247	39 (G)	TNF alpha	SYBR	Unknown	31.886	83.1	Auto Tm	16.6711	18.8882	6.43797	31.886	31.7698	0.430321	Manual Ct		Manual	19	21	Manual	0.455748
271	39 (G)	TNF alpha	SYBR	Unknown	32.1301	83.1	Auto Tm	13.8517	18.8882	6.43797	31.886	31.7698	0.430321	Manual Ct		Manual	19	21	Manual	0.455748
92	4 (12-2)	TNF alpha	SYBR	Unknown	30.0543	83.2	Auto Tm	66.947	50.2828	14.746	30.5783	30.4672	0.370004	Manual Ct		Manual	19	21	Manual	0.455748
116	4 (12-2)	TNF alpha	SYBR	Unknown	30.5783	83.2	Auto Tm	44.979	50.2828	14.746	30.5783	30.4672	0.370004	Manual Ct		Manual	19	21	Manual	0.455748
140	4 (12-2)	TNF alpha	SYBR	Unknown	30.7689	83.2	Auto Tm	38.9222	50.2828	14.746	30.5783	30.4672	0.370004	Manual Ct		Manual	19	21	Manual	0.455748
224	40 (H)	TNF alpha	SYBR	Unknown	30.5184	83.4	Auto Tm	47.0731	44.1801	10.5302	30.5184	30.6292	0.335594	Manual Ct		Manual	19	21	Manual	0.455748
248	40 (H)	TNF alpha	SYBR	Unknown	30.3631	83.4	Auto Tm	52.9614	44.1801	10.5302	30.5184	30.6292	0.335594	Manual Ct		Manual	19	21	Manual	0.455748
272	40 (H)	TNF alpha	SYBR	Unknown	31.0062	83.4	Auto Tm	32.5057	44.1801	10.5302	30.5184	30.6292	0.335594	Manual Ct		Manual	19	21	Manual	0.455748
93	5 (13-1)	TNF alpha	SYBR	Unknown	31.0591	83	Auto Tm	31.2277	25.5634	7.34317	31.1936	31.3641	0.417316	Manual Ct		Manual	19	21	Manual	0.455748
117	5 (13-1)	TNF alpha	SYBR	Unknown	31.1936	83.2	Auto Tm	28.1955	25.5634	7.34317	31.1936	31.3641	0.417316	Manual Ct		Manual	19	21	Manual	0.455748
141	5 (13-1)	TNF alpha	SYBR	Unknown	31.8397	83.2	Auto Tm	17.2669	25.5634	7.34317	31.1936	31.3641	0.417316	Manual Ct		Manual	19	21	Manual	0.455748
94	6 (14-1)	TNF alpha	SYBR	Unknown	30.9085	83	Auto Tm	35.0094	41.3892	6.3114	30.6835	30.6983	0.203197	Manual Ct		Manual	19	21	Manual	0.455748
118	6 (14-1)	TNF alpha	SYBR	Unknown	30.5029	83	Auto Tm	47.6299	41.3892	6.3114	30.6835	30.6983	0.203197	Manual Ct		Manual	19	21	Manual	0.455748
142	6 (14-1)	TNF alpha	SYBR	Unknown	30.6835	83	Auto Tm	41.5281	41.3892	6.3114	30.6835	30.6983	0.203197	Manual Ct		Manual	19	21	Manual	0.455748
95	7 (15-1)	TNF alpha	SYBR	Unknown	30.8372	82.9	Auto Tm	36.954	38.8034	7.13099	30.8372	30.7873	0.236819	Manual Ct		Manual	19	21	Manual	0.455748
119	7 (15-1)	TNF alpha	SYBR	Unknown	30.9952	82.9	Auto Tm	32.7793	38.8034	7.13099	30.8372	30.7873	0.236819	Manual Ct		Manual	19	21	Manual	0.455748
143	7 (15-1)	TNF alpha	SYBR	Unknown	30.5295	82.9	Auto Tm	46.6769	38.8034	7.13099	30.8372	30.7873	0.236819	Manual Ct		Manual	19	21	Manual	0.455748
96	8 (15-2)	TNF alpha	SYBR	Unknown	29.842	82.9	Auto Tm	78.6546	75.4162	9.94071	29.842	29.9054	0.179806	Manual Ct		Manual	19	21	Manual	0.455748
120	8 (15-2)	TNF alpha	SYBR	Unknown	29.7659	82.9	Auto Tm	83.3339	75.4162	9.94071	29.842	29.9054	0.179806	Manual Ct		Manual	19	21	Manual	0.455748
144	8 (15-2)	TNF alpha	SYBR	Unknown	30.1083	82.9	Auto Tm	64.2601	75.4162	9.94071	29.842	29.9054	0.179806	Manual Ct		Manual	19	21	Manual	0.455748
145	9 (16-1)	TNF alpha	SYBR	Unknown	31.0519	82.9	Auto Tm	31.3972	28.1937	2.90392	31.2289	31.1983	0.133692	Manual Ct		Manual	19	21	Manual	0.455748
169	9 (16-1)	TNF alpha	SYBR	Unknown	31.314	82.9	Auto Tm	25.734	28.1937	2.90392	31.2289	31.1983	0.133692	Manual Ct		Manual	19	21	Manual	0.455748
193	9 (16-1)	TNF alpha	SYBR	Unknown	31.2289	83.1	Auto Tm	27.45	28.1937	2.90392	31.2289	31.1983	0.133692	Manual Ct		Manual	19	21	Manual	0.455748
372	Gene 2 Standard (1)	TNF alpha	SYBR	Standard	35.492	82.8	Auto Tm	1						Manual Ct		Manual	19	21	Manual	0.455748
369	Gene 2 Standard (10)	TNF alpha	SYBR	Standard	32.371	83	Auto Tm	10						Manual Ct		Manual	19	21	Manual	0.455748
370	Gene 2 Standard (10)	TNF alpha	SYBR	Standard	32.9496	83	Auto Tm	10						Manual Ct		Manual	19	21	Manual	0.455748
367	Gene 2 Standard (100)	TNF alpha	SYBR	Standard	29.5023	83.9	Auto Tm	100						Manual Ct		Manual	19	21	Manual	0.455748
368	Gene 2 Standard (100)	TNF alpha	SYBR	Standard	29.4481	83.9	Auto Tm	100						Manual Ct		Manual	19	21	Manual	0.455748
380	NTC Gene 2	TNF alpha	SYBR	NTC	Undetermined	61.9	Auto Tm	0						Manual Ct		Manual	19	21	Manual	0.455748						TRUE
383	RT Negative 2	TNF alpha	SYBR	NTC	Undetermined	61.9	Auto Tm	0						Manual Ct		Manual	19	21	Manual	0.455748						TRUE
Slope	-3.03367	cycles/log decade
Y-Intercept		35.593
R^2		0.992126
NAP	LPL

## Sheet: 18S
Well	Sample Name	Detector Name	Reporter	Task	Ct	Tm Value	Tm Type	Quantity	Qty Mean	Qty StdDev	Ct Median	Ct Mean	Ct StdDev	Ct Type	Template Name	Baseline Type	Baseline Start	Baseline Stop	Threshold Type	Threshold	FOS	HMD	LME	EW	BPR	NAW	HNS	HRN	EAF	BAF	TAF	CAF
1	1 (11-1)	18S	SYBR	Unknown	9.63127	83.3	Auto Tm	13.8672	16.1897	2.13568	9.38393	9.42882	0.184145	Automatic Ct		Automatic			Automatic	0.886246
25	1 (11-1)	18S	SYBR	Unknown	9.27128	83.3	Auto Tm	18.0691	16.1897	2.13568	9.38393	9.42882	0.184145	Automatic Ct		Automatic			Automatic	0.886246
49	1 (11-1)	18S	SYBR	Unknown	9.38393	83.3	Auto Tm	16.6328	16.1897	2.13568	9.38393	9.42882	0.184145	Automatic Ct		Automatic			Automatic	0.886246
10	10 (17-1)	18S	SYBR	Unknown	9.04365	83.8	Auto Tm	21.3608	21.7315	0.493422	9.03215	9.02049	0.0307153	Automatic Ct		Automatic			Automatic	0.886246
34	10 (17-1)	18S	SYBR	Unknown	8.98564	83.8	Auto Tm	22.2916	21.7315	0.493422	9.03215	9.02049	0.0307153	Automatic Ct		Automatic			Automatic	0.886246
58	10 (17-1)	18S	SYBR	Unknown	9.03215	83.8	Auto Tm	21.5422	21.7315	0.493422	9.03215	9.02049	0.0307153	Automatic Ct		Automatic			Automatic	0.886246
11	11 (17-2)	18S	SYBR	Unknown	9.19777	83.8	Auto Tm	19.0726	20.1731	0.988688	9.10222	9.12257	0.0673702	Automatic Ct		Automatic			Automatic	0.886246
35	11 (17-2)	18S	SYBR	Unknown	9.06772	83.8	Auto Tm	20.9862	20.1731	0.988688	9.10222	9.12257	0.0673702	Automatic Ct		Automatic			Automatic	0.886246
59	11 (17-2)	18S	SYBR	Unknown	9.10222	83.8	Auto Tm	20.4606	20.1731	0.988688	9.10222	9.12257	0.0673702	Automatic Ct		Automatic			Automatic	0.886246
12	12 (18-1)	18S	SYBR	Unknown	9.32189	83.7	Auto Tm	17.4091	18.462	1.48193	9.29013	9.24486	0.107091	Automatic Ct		Automatic			Automatic	0.886246
36	12 (18-1)	18S	SYBR	Unknown	9.29013	83.7	Auto Tm	17.8203	18.462	1.48193	9.29013	9.24486	0.107091	Automatic Ct		Automatic			Automatic	0.886246
60	12 (18-1)	18S	SYBR	Unknown	9.12257	84	Auto Tm	20.1566	18.462	1.48193	9.29013	9.24486	0.107091	Automatic Ct		Automatic			Automatic	0.886246
13	13 (19-1)	18S	SYBR	Unknown	9.4661	83.7	Auto Tm	15.6577	17.4224	1.93751	9.34516	9.32639	0.149973	Automatic Ct		Automatic			Automatic	0.886246
37	13 (19-1)	18S	SYBR	Unknown	9.16792	83.7	Auto Tm	19.4957	17.4224	1.93751	9.34516	9.32639	0.149973	Automatic Ct		Automatic			Automatic	0.886246
61	13 (19-1)	18S	SYBR	Unknown	9.34516	84	Auto Tm	17.1138	17.4224	1.93751	9.34516	9.32639	0.149973	Automatic Ct		Automatic			Automatic	0.886246
14	14 (20-1)	18S	SYBR	Unknown	9.21907	83.7	Auto Tm	18.7761	17.1726	1.64559	9.33409	9.3447	0.13125	Automatic Ct		Automatic			Automatic	0.886246
38	14 (20-1)	18S	SYBR	Unknown	9.48093	83.7	Auto Tm	15.488	17.1726	1.64559	9.33409	9.3447	0.13125	Automatic Ct		Automatic			Automatic	0.886246
62	14 (20-1)	18S	SYBR	Unknown	9.33409	83.7	Auto Tm	17.2536	17.1726	1.64559	9.33409	9.3447	0.13125	Automatic Ct		Automatic			Automatic	0.886246
15	15 (21-1)	18S	SYBR	Unknown	9.03276	83.7	Auto Tm	21.5326	20.5432	1.00666	9.09451	9.09783	0.066791	Automatic Ct		Automatic			Automatic	0.886246
39	15 (21-1)	18S	SYBR	Unknown	9.16622	83.7	Auto Tm	19.5201	20.5432	1.00666	9.09451	9.09783	0.066791	Automatic Ct		Automatic			Automatic	0.886246
63	15 (21-1)	18S	SYBR	Unknown	9.09451	83.7	Auto Tm	20.5769	20.5432	1.00666	9.09451	9.09783	0.066791	Automatic Ct		Automatic			Automatic	0.886246
16	16 (21-2)	18S	SYBR	Unknown	9.04887	83.7	Auto Tm	21.279	21.0915	0.516678	9.04887	9.06118	0.0335185	Automatic Ct		Automatic			Automatic	0.886246
40	16 (21-2)	18S	SYBR	Unknown	9.09911	83.7	Auto Tm	20.5073	21.0915	0.516678	9.04887	9.06118	0.0335185	Automatic Ct		Automatic			Automatic	0.886246
64	16 (21-2)	18S	SYBR	Unknown	9.03556	83.7	Auto Tm	21.4883	21.0915	0.516678	9.04887	9.06118	0.0335185	Automatic Ct		Automatic			Automatic	0.886246
17	17 (22-1)	18S	SYBR	Unknown	9.15862	83.7	Auto Tm	19.6295	20.6215	1.53378	9.14363	9.09401	0.0992181	Automatic Ct		Automatic			Automatic	0.886246
41	17 (22-1)	18S	SYBR	Unknown	8.97977	83.7	Auto Tm	22.3881	20.6215	1.53378	9.14363	9.09401	0.0992181	Automatic Ct		Automatic			Automatic	0.886246
65	17 (22-1)	18S	SYBR	Unknown	9.14363	83.7	Auto Tm	19.847	20.6215	1.53378	9.14363	9.09401	0.0992181	Automatic Ct		Automatic			Automatic	0.886246
18	18 (23-1)	18S	SYBR	Unknown	8.64044	83.7	Auto Tm	28.7321	27.0621	1.46798	8.75152	8.72319	0.0728471	Automatic Ct		Automatic			Automatic	0.886246
42	18 (23-1)	18S	SYBR	Unknown	8.75152	83.7	Auto Tm	26.4788	27.0621	1.46798	8.75152	8.72319	0.0728471	Automatic Ct		Automatic			Automatic	0.886246
66	18 (23-1)	18S	SYBR	Unknown	8.77762	83.7	Auto Tm	25.9755	27.0621	1.46798	8.75152	8.72319	0.0728471	Automatic Ct		Automatic			Automatic	0.886246
19	19 (23-2)	18S	SYBR	Unknown	8.6485	83.7	Auto Tm	28.5623	26.8298	1.83845	8.7237	8.73576	0.093869	Automatic Ct		Automatic			Automatic	0.886246
43	19 (23-2)	18S	SYBR	Unknown	8.83507	83.7	Auto Tm	24.9011	26.8298	1.83845	8.7237	8.73576	0.093869	Automatic Ct		Automatic			Automatic	0.886246
67	19 (23-2)	18S	SYBR	Unknown	8.7237	83.7	Auto Tm	27.0259	26.8298	1.83845	8.7237	8.73576	0.093869	Automatic Ct		Automatic			Automatic	0.886246
2	2 (11-2)	18S	SYBR	Unknown	9.32398	83.3	Auto Tm	17.3824	17.3774	0.802031	9.32398	9.32533	0.0628381	Automatic Ct		Automatic			Automatic	0.886246
26	2 (11-2)	18S	SYBR	Unknown	9.38884	83.3	Auto Tm	16.5729	17.3774	0.802031	9.32398	9.32533	0.0628381	Automatic Ct		Automatic			Automatic	0.886246
50	2 (11-2)	18S	SYBR	Unknown	9.26319	83.3	Auto Tm	18.1769	17.3774	0.802031	9.32398	9.32533	0.0628381	Automatic Ct		Automatic			Automatic	0.886246
20	20 (24-1)	18S	SYBR	Unknown	9.31033	83.7	Auto Tm	17.5577	16.5327	0.892613	9.42703	9.39344	0.0724158	Automatic Ct		Automatic			Automatic	0.886246
44	20 (24-1)	18S	SYBR	Unknown	9.44296	83.7	Auto Tm	15.9264	16.5327	0.892613	9.42703	9.39344	0.0724158	Automatic Ct		Automatic			Automatic	0.886246
68	20 (24-1)	18S	SYBR	Unknown	9.42703	83.7	Auto Tm	16.114	16.5327	0.892613	9.42703	9.39344	0.0724158	Automatic Ct		Automatic			Automatic	0.886246
21	21 (24-2)	18S	SYBR	Unknown	8.98127	83.4	Auto Tm	22.3634	19.9769	2.30661	9.1463	9.14079	0.156832	Automatic Ct		Automatic			Automatic	0.886246
45	21 (24-2)	18S	SYBR	Unknown	9.29479	83.7	Auto Tm	17.7594	19.9769	2.30661	9.1463	9.14079	0.156832	Automatic Ct		Automatic			Automatic	0.886246
69	21 (24-2)	18S	SYBR	Unknown	9.1463	83.4	Auto Tm	19.808	19.9769	2.30661	9.1463	9.14079	0.156832	Automatic Ct		Automatic			Automatic	0.886246
22	22 (25-2)	18S	SYBR	Unknown	8.93314	83.4	Auto Tm	23.1689	21.364	2.88094	8.95012	9.0522	0.191711	Automatic Ct		Automatic			Automatic	0.886246
46	22 (25-2)	18S	SYBR	Unknown	9.27336	83.4	Auto Tm	18.0415	21.364	2.88094	8.95012	9.0522	0.191711	Automatic Ct		Automatic			Automatic	0.886246
70	22 (25-2)	18S	SYBR	Unknown	8.95012	83.4	Auto Tm	22.8815	21.364	2.88094	8.95012	9.0522	0.191711	Automatic Ct		Automatic			Automatic	0.886246
23	23 (26-1)	18S	SYBR	Unknown	9.20599	83.4	Auto Tm	18.9576	18.4871	0.790384	9.20803	9.24101	0.0589026	Automatic Ct		Automatic			Automatic	0.886246
47	23 (26-1)	18S	SYBR	Unknown	9.20803	83.4	Auto Tm	18.9291	18.4871	0.790384	9.20803	9.24101	0.0589026	Automatic Ct		Automatic			Automatic	0.886246
71	23 (26-1)	18S	SYBR	Unknown	9.30902	83.4	Auto Tm	17.5746	18.4871	0.790384	9.20803	9.24101	0.0589026	Automatic Ct		Automatic			Automatic	0.886246
24	24 (26-2)	18S	SYBR	Unknown	8.96121	83.4	Auto Tm	22.6957	23.8143	1.16374	8.90066	8.89685	0.0663462	Automatic Ct		Automatic			Automatic	0.886246
48	24 (26-2)	18S	SYBR	Unknown	8.90066	83.4	Auto Tm	23.7289	23.8143	1.16374	8.90066	8.89685	0.0663462	Automatic Ct		Automatic			Automatic	0.886246
72	24 (26-2)	18S	SYBR	Unknown	8.82868	83.4	Auto Tm	25.0184	23.8143	1.16374	8.90066	8.89685	0.0663462	Automatic Ct		Automatic			Automatic	0.886246
73	25 (27-1)	18S	SYBR	Unknown	8.98256	83.3	Auto Tm	22.3422	22.2552	0.12302	8.98787	8.98787	0.00751832	Automatic Ct		Automatic			Automatic	0.886246
97	25 (27-1)	18S	SYBR	Unknown	8.99319	83.3	Auto Tm	22.1683	22.2552	0.12302	8.98787	8.98787	0.00751832	Automatic Ct		Automatic			Automatic	0.886246
97	25 (27-1)	18S	SYBR	Unknown	8.99319	83.3	Auto Tm	22.1683	22.2552	0.12302	8.98787	8.98787	0.00751832	Automatic Ct		Automatic			Automatic	0.886246
74	26 (27-2)	18S	SYBR	Unknown	8.96789	83.3	Auto Tm	22.5845	22.5366	0.59893	8.96789	8.97109	0.0362131	Automatic Ct		Automatic			Automatic	0.886246
98	26 (27-2)	18S	SYBR	Unknown	9.0088	83.3	Auto Tm	21.9152	22.5366	0.59893	8.96789	8.97109	0.0362131	Automatic Ct		Automatic			Automatic	0.886246
122	26 (27-2)	18S	SYBR	Unknown	8.93659	83.6	Auto Tm	23.1102	22.5366	0.59893	8.96789	8.97109	0.0362131	Automatic Ct		Automatic			Automatic	0.886246
75	27 (27-3)	18S	SYBR	Unknown	8.96901	83.6	Auto Tm	22.5658	22.7935	0.471468	8.96901	8.95555	0.0279754	Automatic Ct		Automatic			Automatic	0.886246
99	27 (27-3)	18S	SYBR	Unknown	8.92339	83.6	Auto Tm	23.3356	22.7935	0.471468	8.96901	8.95555	0.0279754	Automatic Ct		Automatic			Automatic	0.886246
123	27 (27-3)	18S	SYBR	Unknown	8.97425	83.6	Auto Tm	22.4791	22.7935	0.471468	8.96901	8.95555	0.0279754	Automatic Ct		Automatic			Automatic	0.886246
76	28 (28-1)	18S	SYBR	Unknown	8.85434	83.6	Auto Tm	24.5508	23.4873	1.00663	8.92187	8.91541	0.0581018	Automatic Ct		Automatic			Automatic	0.886246
100	28 (28-1)	18S	SYBR	Unknown	8.97001	83.6	Auto Tm	22.5494	23.4873	1.00663	8.92187	8.91541	0.0581018	Automatic Ct		Automatic			Automatic	0.886246
124	28 (28-1)	18S	SYBR	Unknown	8.92187	83.6	Auto Tm	23.3616	23.4873	1.00663	8.92187	8.91541	0.0581018	Automatic Ct		Automatic			Automatic	0.886246
77	29 (28-2)	18S	SYBR	Unknown	9.12457	83.6	Auto Tm	20.1271	20.5837	0.401936	9.08377	9.09423	0.0266907	Automatic Ct		Automatic			Automatic	0.886246
101	29 (28-2)	18S	SYBR	Unknown	9.07436	83.6	Auto Tm	20.884	20.5837	0.401936	9.08377	9.09423	0.0266907	Automatic Ct		Automatic			Automatic	0.886246
125	29 (28-2)	18S	SYBR	Unknown	9.08377	83.6	Auto Tm	20.74	20.5837	0.401936	9.08377	9.09423	0.0266907	Automatic Ct		Automatic			Automatic	0.886246
3	3 (12-1)	18S	SYBR	Unknown	8.83667	83.3	Auto Tm	24.8719	29.3828	4.3537	8.59462	8.62016	0.204942	Automatic Ct		Automatic			Automatic	0.886246
27	3 (12-1)	18S	SYBR	Unknown	8.59462	83.6	Auto Tm	29.7165	29.3828	4.3537	8.59462	8.62016	0.204942	Automatic Ct		Automatic			Automatic	0.886246
51	3 (12-1)	18S	SYBR	Unknown	8.42918	83.6	Auto Tm	33.5601	29.3828	4.3537	8.59462	8.62016	0.204942	Automatic Ct		Automatic			Automatic	0.886246
78	30 (28-3)	18S	SYBR	Unknown	9.24804	83.6	Auto Tm	18.3804	18.557	0.621433	9.24804	9.23554	0.0452664	Automatic Ct		Automatic			Automatic	0.886246
102	30 (28-3)	18S	SYBR	Unknown	9.27324	83.6	Auto Tm	18.0431	18.557	0.621433	9.24804	9.23554	0.0452664	Automatic Ct		Automatic			Automatic	0.886246
126	30 (28-3)	18S	SYBR	Unknown	9.18534	83.8	Auto Tm	19.2477	18.557	0.621433	9.24804	9.23554	0.0452664	Automatic Ct		Automatic			Automatic	0.886246
79	31 (29-1)	18S	SYBR	Unknown	9.31098	83.8	Auto Tm	17.5492	17.5716	1.43402	9.31098	9.31227	0.111171	Automatic Ct		Automatic			Automatic	0.886246
103	31 (29-1)	18S	SYBR	Unknown	9.42408	83.8	Auto Tm	16.1489	17.5716	1.43402	9.31098	9.31227	0.111171	Automatic Ct		Automatic			Automatic	0.886246
127	31 (29-1)	18S	SYBR	Unknown	9.20175	83.8	Auto Tm	19.0167	17.5716	1.43402	9.31098	9.31227	0.111171	Automatic Ct		Automatic			Automatic	0.886246
80	32 (29-2)	18S	SYBR	Unknown	9.18764	83.8	Auto Tm	19.2151	20.2815	0.962765	9.09676	9.11521	0.0651961	Automatic Ct		Automatic			Automatic	0.886246
104	32 (29-2)	18S	SYBR	Unknown	9.06122	83.8	Auto Tm	21.0867	20.2815	0.962765	9.09676	9.11521	0.0651961	Automatic Ct		Automatic			Automatic	0.886246
128	32 (29-2)	18S	SYBR	Unknown	9.09676	83.8	Auto Tm	20.5428	20.2815	0.962765	9.09676	9.11521	0.0651961	Automatic Ct		Automatic			Automatic	0.886246
81	33 (30-1)	18S	SYBR	Unknown	8.60982	83.8	Auto Tm	29.3862	28.5	1.33378	8.6209	8.65248	0.0645301	Automatic Ct		Automatic			Automatic	0.886246
105	33 (30-1)	18S	SYBR	Unknown	8.72672	83.8	Auto Tm	26.9661	28.5	1.33378	8.6209	8.65248	0.0645301	Automatic Ct		Automatic			Automatic	0.886246
129	33 (30-1)	18S	SYBR	Unknown	8.6209	83.8	Auto Tm	29.1479	28.5	1.33378	8.6209	8.65248	0.0645301	Automatic Ct		Automatic			Automatic	0.886246
82	34 (30-2)	18S	SYBR	Unknown	8.97195	83.8	Auto Tm	22.5172	22.8563	0.545357	8.96898	8.95187	0.0322376	Automatic Ct		Automatic			Automatic	0.886246
106	34 (30-2)	18S	SYBR	Unknown	8.96898	83.8	Auto Tm	22.5663	22.8563	0.545357	8.96898	8.95187	0.0322376	Automatic Ct		Automatic			Automatic	0.886246
130	34 (30-2)	18S	SYBR	Unknown	8.91469	83.8	Auto Tm	23.4854	22.8563	0.545357	8.96898	8.95187	0.0322376	Automatic Ct		Automatic			Automatic	0.886246
83	35 (31-1)	18S	SYBR	Unknown	9.1378	84	Auto Tm	19.9322	20.5437	0.539695	9.08342	9.09702	0.035966	Automatic Ct		Automatic			Automatic	0.886246
107	35 (31-1)	18S	SYBR	Unknown	9.08342	83.8	Auto Tm	20.7454	20.5437	0.539695	9.08342	9.09702	0.035966	Automatic Ct		Automatic			Automatic	0.886246
131	35 (31-1)	18S	SYBR	Unknown	9.06984	84	Auto Tm	20.9535	20.5437	0.539695	9.08342	9.09702	0.035966	Automatic Ct		Automatic			Automatic	0.886246
84	36 (31-2)	18S	SYBR	Unknown	9.24182	83.7	Auto Tm	18.4647	18.3761	0.465485	9.24182	9.24865	0.0345816	Automatic Ct		Automatic			Automatic	0.886246
108	36 (31-2)	18S	SYBR	Unknown	9.28614	84	Auto Tm	17.8727	18.3761	0.465485	9.24182	9.24865	0.0345816	Automatic Ct		Automatic			Automatic	0.886246
132	36 (31-2)	18S	SYBR	Unknown	9.218	84	Auto Tm	18.7909	18.3761	0.465485	9.24182	9.24865	0.0345816	Automatic Ct		Automatic			Automatic	0.886246
85	37 (32-1)	18S	SYBR	Unknown	8.79561	84	Auto Tm	25.6343	26.1516	1.4541	8.79561	8.76981	0.0747253	Automatic Ct		Automatic			Automatic	0.886246
109	37 (32-1)	18S	SYBR	Unknown	8.82822	84	Auto Tm	25.027	26.1516	1.4541	8.79561	8.76981	0.0747253	Automatic Ct		Automatic			Automatic	0.886246
133	37 (32-1)	18S	SYBR	Unknown	8.6856	84	Auto Tm	27.7937	26.1516	1.4541	8.79561	8.76981	0.0747253	Automatic Ct		Automatic			Automatic	0.886246
86	38 (A)	18S	SYBR	Unknown	9.26059	84	Auto Tm	18.2116	18.1276	0.524263	9.26059	9.26726	0.0394811	Automatic Ct		Automatic			Automatic	0.886246
110	38 (A)	18S	SYBR	Unknown	9.23154	84	Auto Tm	18.6047	18.1276	0.524263	9.26059	9.26726	0.0394811	Automatic Ct		Automatic			Automatic	0.886246
134	38 (A)	18S	SYBR	Unknown	9.30965	84	Auto Tm	17.5664	18.1276	0.524263	9.26059	9.26726	0.0394811	Automatic Ct		Automatic			Automatic	0.886246
87	39 (G)	18S	SYBR	Unknown	8.56485	83.7	Auto Tm	30.3741	33.7358	5.15008	8.52973	8.43215	0.200204	Automatic Ct		Automatic			Automatic	0.886246
111	39 (G)	18S	SYBR	Unknown	8.52973	83.7	Auto Tm	31.1685	33.7358	5.15008	8.52973	8.43215	0.200204	Automatic Ct		Automatic			Automatic	0.886246
135	39 (G)	18S	SYBR	Unknown	8.20186	84	Auto Tm	39.6649	33.7358	5.15008	8.52973	8.43215	0.200204	Automatic Ct		Automatic			Automatic	0.886246
4	4 (12-2)	18S	SYBR	Unknown	9.25991	83.3	Auto Tm	18.2207	18.8159	0.515598	9.19582	9.21654	0.0375738	Automatic Ct		Automatic			Automatic	0.886246
28	4 (12-2)	18S	SYBR	Unknown	9.19389	83.6	Auto Tm	19.127	18.8159	0.515598	9.19582	9.21654	0.0375738	Automatic Ct		Automatic			Automatic	0.886246
52	4 (12-2)	18S	SYBR	Unknown	9.19582	83.6	Auto Tm	19.0999	18.8159	0.515598	9.19582	9.21654	0.0375738	Automatic Ct		Automatic			Automatic	0.886246
88	40 (H)	18S	SYBR	Unknown	8.98976	84	Auto Tm	22.2242	30.5612	14.8677	8.98976	8.65338	0.609152	Automatic Ct		Automatic			Automatic	0.886246
112	40 (H)	18S	SYBR	Unknown	9.02018	83.7	Auto Tm	21.7327	30.5612	14.8677	8.98976	8.65338	0.609152	Automatic Ct		Automatic			Automatic	0.886246
136	40 (H)	18S	SYBR	Unknown	7.95021	83.7	Auto Tm	47.7266	30.5612	14.8677	8.98976	8.65338	0.609152	Automatic Ct		Automatic			Automatic	0.886246
5	5 (13-1)	18S	SYBR	Unknown	8.47139	83.6	Auto Tm	32.5347	31.6372	2.28604	8.47139	8.51186	0.100233	Automatic Ct		Automatic			Automatic	0.886246
29	5 (13-1)	18S	SYBR	Unknown	8.626	83.6	Auto Tm	29.0386	31.6372	2.28604	8.47139	8.51186	0.100233	Automatic Ct		Automatic			Automatic	0.886246
53	5 (13-1)	18S	SYBR	Unknown	8.4382	83.6	Auto Tm	33.3383	31.6372	2.28604	8.47139	8.51186	0.100233	Automatic Ct		Automatic			Automatic	0.886246
6	6 (14-1)	18S	SYBR	Unknown	9.10725	83.6	Auto Tm	20.385	20.4911	0.799554	9.10725	9.10088	0.0528988	Automatic Ct		Automatic			Automatic	0.886246
30	6 (14-1)	18S	SYBR	Unknown	9.04509	83.6	Auto Tm	21.3384	20.4911	0.799554	9.10725	9.10088	0.0528988	Automatic Ct		Automatic			Automatic	0.886246
54	6 (14-1)	18S	SYBR	Unknown	9.15031	83.6	Auto Tm	19.7498	20.4911	0.799554	9.10725	9.10088	0.0528988	Automatic Ct		Automatic			Automatic	0.886246
7	7 (15-1)	18S	SYBR	Unknown	9.56006	83.5	Auto Tm	14.6126	15.311	1.48087	9.56006	9.50066	0.128441	Automatic Ct		Automatic			Automatic	0.886246
31	7 (15-1)	18S	SYBR	Unknown	9.35328	83.5	Auto Tm	17.0119	15.311	1.48087	9.56006	9.50066	0.128441	Automatic Ct		Automatic			Automatic	0.886246
55	7 (15-1)	18S	SYBR	Unknown	9.58866	83.8	Auto Tm	14.3085	15.311	1.48087	9.56006	9.50066	0.128441	Automatic Ct		Automatic			Automatic	0.886246
8	8 (15-2)	18S	SYBR	Unknown	9.23077	83.8	Auto Tm	18.6153	19.3291	0.629326	9.16289	9.18008	0.0446514	Automatic Ct		Automatic			Automatic	0.886246
32	8 (15-2)	18S	SYBR	Unknown	9.14658	83.8	Auto Tm	19.804	19.3291	0.629326	9.16289	9.18008	0.0446514	Automatic Ct		Automatic			Automatic	0.886246
56	8 (15-2)	18S	SYBR	Unknown	9.16289	83.8	Auto Tm	19.568	19.3291	0.629326	9.16289	9.18008	0.0446514	Automatic Ct		Automatic			Automatic	0.886246
9	9 (16-1)	18S	SYBR	Unknown	9.08601	83.8	Auto Tm	20.7059	19.7214	1.90964	9.08601	9.15669	0.135766	Automatic Ct		Automatic			Automatic	0.886246
33	9 (16-1)	18S	SYBR	Unknown	9.31322	83.8	Auto Tm	17.5204	19.7214	1.90964	9.08601	9.15669	0.135766	Automatic Ct		Automatic			Automatic	0.886246
57	9 (16-1)	18S	SYBR	Unknown	9.07085	83.8	Auto Tm	20.938	19.7214	1.90964	9.08601	9.15669	0.135766	Automatic Ct		Automatic			Automatic	0.886246
365	Gene 1 Standard (1)	18S	SYBR	Standard	13.2794	83	Auto Tm	1						Automatic Ct		Automatic			Automatic	0.886246
366	Gene 1 Standard (1)	18S	SYBR	Standard	13.319	83	Auto Tm	1						Automatic Ct		Automatic			Automatic	0.886246
363	Gene 1 Standard (10)	18S	SYBR	Standard	9.8299	83	Auto Tm	10						Automatic Ct		Automatic			Automatic	0.886246
364	Gene 1 Standard (10)	18S	SYBR	Standard	9.95618	83.3	Auto Tm	10						Automatic Ct		Automatic			Automatic	0.886246
362	Gene 1 Standard (100)	18S	SYBR	Standard	7.12707	83.8	Auto Tm	100						Automatic Ct		Automatic			Automatic	0.886246
379	NTC Gene 1	18S	SYBR	NTC	Undetermined	61.8	Auto Tm	0						Automatic Ct		Automatic			Automatic	0.886246						TRUE
382	RT Negative 1	18S	SYBR	NTC	21.979	83.9	Auto Tm	0.00158232						Automatic Ct		Automatic			Automatic	0.886246
Slope	-3.13179	cycles/log decade
Y-Intercept		13.2077
R^2		0.995438
		18S
	Mouse ID	Qty Mean
1	11-1 (4%+RC+HFHC)	16.1897
2	11-2 (4%+RC+HFHC)	17.3774
3	12-1 (18%+RC+HFHC)	29.3828
4	12-2 (18%+RC+HFHC)	18.8159
5	13-1 (4%+RC+RC)	31.6372
6	14-1 (18%+RC+RC)	20.4911
7	15-1 (4%+RC+HFHC)	15.311
8	15-2 (4%+RC+HFHC)	19.3291
9	16-1 (4%+RC+RC)	19.7214
10	17-1 (18%+RC+HFHC)	21.7315
11	17-2 (18%+RC+HFHC)	20.1731
12	18-1 (18%+RC+RC)	18.462
13	19-1 (4%+RC+HFHC)	17.4224
14	20-1 (4%+RC+RC)	17.1726
15	21-1 (4%+RC+HFHC)	20.5432
16	21-2 (4%+RC+HFHC)	21.0915
17	22-1 (4%+RC+RC)	20.6215
18	23-1 (4%+RC+HFHC)	27.0621
19	23-2 (4%+RC+HFHC)	26.8298
20	24-1 (4%+RC+RC)	16.5327
21	24-2 (4%+RC+RC)	19.9769
22	25-2 (18%+RC+HFHC)	21.364
23	26-1 (18%+RC+RC)	18.4871
24	26-2 (18%+RC+RC)	23.8143
25	27-1 (4%+RC - 5 WEEKS)	22.2552
26	27-2 (4%+RC - 5 WEEKS)	22.5366
27	27-3 (4%+RC - 5 WEEKS)	22.7935
28	28-1 (18%+RC - 4 WEEKS)	23.4873
29	28-2 (18%+RC - 4 WEEKS)	20.5837
30	28-3 (18%+RC - 4 WEEKS)	18.557
31	29-1 (4%- 4 WEEKS)	17.5716
32	29-2 (4%- 4 WEEKS)	20.2815
33	30-1 (18%- 4 WEEKS)	28.5
34	30-2 (18%- 4 WEEKS)	22.8563
35	31-1 (4%- 4 WEEKS)	20.5437
36	31-2 (4%- 4 WEEKS)	18.3761
37	32-1 (18%- 4 WEEKS)	26.1516
38	A (18%+RC+RC)	18.1276
39	G (18%+RC+RC)	33.7358
40	H (18%+RC+RC)	30.5612

## Sheet: TNF-a
Well	Sample Name	Detector Name	Reporter	Task	Ct	Tm Value	Tm Type	Quantity	Qty Mean	Qty StdDev	Ct Median	Ct Mean	Ct StdDev	Ct Type	Template Name	Baseline Type	Baseline Start	Baseline Stop	Threshold Type	Threshold	FOS	HMD	LME	EW	BPR	NAW	HNS	HRN	EAF	BAF	TAF	CAF
89	1 (11-1)	TNF alpha	SYBR	Unknown	30.7789	83.3	Auto Tm	38.6283	45.9513	6.34524	30.4546	30.5591	0.190439	Manual Ct		Manual	19	21	Manual	0.455748
113	1 (11-1)	TNF alpha	SYBR	Unknown	30.4437	83.3	Auto Tm	49.8164	45.9513	6.34524	30.4546	30.5591	0.190439	Manual Ct		Manual	19	21	Manual	0.455748
137	1 (11-1)	TNF alpha	SYBR	Unknown	30.4546	83.3	Auto Tm	49.4094	45.9513	6.34524	30.4546	30.5591	0.190439	Manual Ct		Manual	19	21	Manual	0.455748
146	10 (17-1)	TNF alpha	SYBR	Unknown	29.1567	83.1	Auto Tm	132.315	117.616	24.559	29.1672	29.3331	0.296414	Manual Ct		Manual	19	21	Manual	0.455748
170	10 (17-1)	TNF alpha	SYBR	Unknown	29.6753	83.1	Auto Tm	89.2638	117.616	24.559	29.1672	29.3331	0.296414	Manual Ct		Manual	19	21	Manual	0.455748
194	10 (17-1)	TNF alpha	SYBR	Unknown	29.1672	83.1	Auto Tm	131.269	117.616	24.559	29.1672	29.3331	0.296414	Manual Ct		Manual	19	21	Manual	0.455748
147	11 (17-2)	TNF alpha	SYBR	Unknown	27.8744	83.1	Auto Tm	350.205	339.658	14.9147	27.9153	27.9153	0.0578713	Manual Ct		Manual	19	21	Manual	0.455748
195	11 (17-2)	TNF alpha	SYBR	Unknown	27.9562	83.1	Auto Tm	329.112	339.658	14.9147	27.9153	27.9153	0.0578713	Manual Ct		Manual	19	21	Manual	0.455748
195	11 (17-2)	TNF alpha	SYBR	Unknown	27.9562	83.1	Auto Tm	329.112	339.658	14.9147	27.9153	27.9153	0.0578713	Manual Ct		Manual	19	21	Manual	0.455748
148	12 (18-1)	TNF alpha	SYBR	Unknown	30.3278	83.1	Auto Tm	54.3974	38.6328	13.9067	30.9706	30.8321	0.451268	Manual Ct		Manual	19	21	Manual	0.455748
172	12 (18-1)	TNF alpha	SYBR	Unknown	31.1979	83.1	Auto Tm	28.1041	38.6328	13.9067	30.9706	30.8321	0.451268	Manual Ct		Manual	19	21	Manual	0.455748
196	12 (18-1)	TNF alpha	SYBR	Unknown	30.9706	83.1	Auto Tm	33.3969	38.6328	13.9067	30.9706	30.8321	0.451268	Manual Ct		Manual	19	21	Manual	0.455748
149	13 (19-1)	TNF alpha	SYBR	Unknown	29.4621	83.1	Auto Tm	104.941	92.6071	18.1221	29.5115	29.6453	0.275528	Manual Ct		Manual	19	21	Manual	0.455748
173	13 (19-1)	TNF alpha	SYBR	Unknown	29.5115	83.1	Auto Tm	101.08	92.6071	18.1221	29.5115	29.6453	0.275528	Manual Ct		Manual	19	21	Manual	0.455748
197	13 (19-1)	TNF alpha	SYBR	Unknown	29.9621	83.1	Auto Tm	71.8005	92.6071	18.1221	29.5115	29.6453	0.275528	Manual Ct		Manual	19	21	Manual	0.455748
150	14 (20-1)	TNF alpha	SYBR	Unknown	29.6363	83.1	Auto Tm	91.9479	76.1695	14.2847	29.9504	29.8993	0.241574	Manual Ct		Manual	19	21	Manual	0.455748
174	14 (20-1)	TNF alpha	SYBR	Unknown	30.1112	83.1	Auto Tm	64.1169	76.1695	14.2847	29.9504	29.8993	0.241574	Manual Ct		Manual	19	21	Manual	0.455748
198	14 (20-1)	TNF alpha	SYBR	Unknown	29.9504	83.4	Auto Tm	72.4437	76.1695	14.2847	29.9504	29.8993	0.241574	Manual Ct		Manual	19	21	Manual	0.455748
151	15 (21-1)	TNF alpha	SYBR	Unknown	30.999	83.1	Auto Tm	32.6845	37.103	5.60946	30.9009	30.8416	0.193926	Manual Ct		Manual	19	21	Manual	0.455748
175	15 (21-1)	TNF alpha	SYBR	Unknown	30.625	83.4	Auto Tm	43.4139	37.103	5.60946	30.9009	30.8416	0.193926	Manual Ct		Manual	19	21	Manual	0.455748
199	15 (21-1)	TNF alpha	SYBR	Unknown	30.9009	83.4	Auto Tm	35.2105	37.103	5.60946	30.9009	30.8416	0.193926	Manual Ct		Manual	19	21	Manual	0.455748
152	16 (21-2)	TNF alpha	SYBR	Unknown	30.608	83.4	Auto Tm	43.9779	46.6977	3.39668	30.56	30.5312	0.0945026	Manual Ct		Manual	19	21	Manual	0.455748
176	16 (21-2)	TNF alpha	SYBR	Unknown	30.4257	83.4	Auto Tm	50.505	46.6977	3.39668	30.56	30.5312	0.0945026	Manual Ct		Manual	19	21	Manual	0.455748
200	16 (21-2)	TNF alpha	SYBR	Unknown	30.56	83.4	Auto Tm	45.6103	46.6977	3.39668	30.56	30.5312	0.0945026	Manual Ct		Manual	19	21	Manual	0.455748
153	17 (22-1)	TNF alpha	SYBR	Unknown	31.3128	83.3	Auto Tm	25.7581	23.4322	4.20446	31.3128	31.4528	0.251554	Manual Ct		Manual	19	21	Manual	0.455748
177	17 (22-1)	TNF alpha	SYBR	Unknown	31.3025	83.3	Auto Tm	25.9597	23.4322	4.20446	31.3128	31.4528	0.251554	Manual Ct		Manual	19	21	Manual	0.455748
201	17 (22-1)	TNF alpha	SYBR	Unknown	31.7432	83.3	Auto Tm	18.5787	23.4322	4.20446	31.3128	31.4528	0.251554	Manual Ct		Manual	19	21	Manual	0.455748
154	18 (23-1)	TNF alpha	SYBR	Unknown	30.575	83.3	Auto Tm	45.0927	36.947	9.4536	30.7606	30.869	0.360601	Manual Ct		Manual	19	21	Manual	0.455748
178	18 (23-1)	TNF alpha	SYBR	Unknown	30.7606	83.3	Auto Tm	39.1676	36.947	9.4536	30.7606	30.869	0.360601	Manual Ct		Manual	19	21	Manual	0.455748
202	18 (23-1)	TNF alpha	SYBR	Unknown	31.2713	83.3	Auto Tm	26.5808	36.947	9.4536	30.7606	30.869	0.360601	Manual Ct		Manual	19	21	Manual	0.455748
155	19 (23-2)	TNF alpha	SYBR	Unknown	30.5269	83.3	Auto Tm	46.7705	51.8546	8.66145	30.5222	30.4025	0.211297	Manual Ct		Manual	19	21	Manual	0.455748
179	19 (23-2)	TNF alpha	SYBR	Unknown	30.5222	83.3	Auto Tm	46.9377	51.8546	8.66145	30.5222	30.4025	0.211297	Manual Ct		Manual	19	21	Manual	0.455748
203	19 (23-2)	TNF alpha	SYBR	Unknown	30.1586	83.6	Auto Tm	61.8555	51.8546	8.66145	30.5222	30.4025	0.211297	Manual Ct		Manual	19	21	Manual	0.455748
90	2 (11-2)	TNF alpha	SYBR	Unknown	30.2667	83.2	Auto Tm	56.9801	54.1175	5.19795	30.2667	30.3389	0.130463	Manual Ct		Manual	19	21	Manual	0.455748
114	2 (11-2)	TNF alpha	SYBR	Unknown	30.2604	83.2	Auto Tm	57.2549	54.1175	5.19795	30.2667	30.3389	0.130463	Manual Ct		Manual	19	21	Manual	0.455748
138	2 (11-2)	TNF alpha	SYBR	Unknown	30.4895	83.2	Auto Tm	48.1175	54.1175	5.19795	30.2667	30.3389	0.130463	Manual Ct		Manual	19	21	Manual	0.455748
156	20 (24-1)	TNF alpha	SYBR	Unknown	31.0807	83.3	Auto Tm	30.7193	29.3596	5.65474	31.0807	31.1577	0.265795	Manual Ct		Manual	19	21	Manual	0.455748
180	20 (24-1)	TNF alpha	SYBR	Unknown	30.9389	83.3	Auto Tm	34.2105	29.3596	5.65474	31.0807	31.1577	0.265795	Manual Ct		Manual	19	21	Manual	0.455748
204	20 (24-1)	TNF alpha	SYBR	Unknown	31.4535	83.3	Auto Tm	23.149	29.3596	5.65474	31.0807	31.1577	0.265795	Manual Ct		Manual	19	21	Manual	0.455748
157	21 (24-2)	TNF alpha	SYBR	Unknown	30.6643	83.3	Auto Tm	42.1389	46.5569	9.31131	30.6643	30.5495	0.252125	Manual Ct		Manual	19	21	Manual	0.455748
181	21 (24-2)	TNF alpha	SYBR	Unknown	30.2604	83.3	Auto Tm	57.2548	46.5569	9.31131	30.6643	30.5495	0.252125	Manual Ct		Manual	19	21	Manual	0.455748
205	21 (24-2)	TNF alpha	SYBR	Unknown	30.7238	83.3	Auto Tm	40.2769	46.5569	9.31131	30.6643	30.5495	0.252125	Manual Ct		Manual	19	21	Manual	0.455748
158	22 (25-2)	TNF alpha	SYBR	Unknown	30.004	83.6	Auto Tm	69.555	69.6467	1.76825	30.004	30.0025	0.0334252	Manual Ct		Manual	19	21	Manual	0.455748
182	22 (25-2)	TNF alpha	SYBR	Unknown	29.9684	83.6	Auto Tm	71.459	69.6467	1.76825	30.004	30.0025	0.0334252	Manual Ct		Manual	19	21	Manual	0.455748
206	22 (25-2)	TNF alpha	SYBR	Unknown	30.0352	83.6	Auto Tm	67.9261	69.6467	1.76825	30.004	30.0025	0.0334252	Manual Ct		Manual	19	21	Manual	0.455748
159	23 (26-1)	TNF alpha	SYBR	Unknown	30.3992	83.3	Auto Tm	51.5274	50.2343	9.76037	30.3992	30.4501	0.264658	Manual Ct		Manual	19	21	Manual	0.455748
183	23 (26-1)	TNF alpha	SYBR	Unknown	30.7365	83.3	Auto Tm	39.8919	50.2343	9.76037	30.3992	30.4501	0.264658	Manual Ct		Manual	19	21	Manual	0.455748
207	23 (26-1)	TNF alpha	SYBR	Unknown	30.2145	83.6	Auto Tm	59.2837	50.2343	9.76037	30.3992	30.4501	0.264658	Manual Ct		Manual	19	21	Manual	0.455748
160	24 (26-2)	TNF alpha	SYBR	Unknown	31.0025	83.3	Auto Tm	32.5967	32.179	3.2698	31.0025	31.0241	0.135684	Manual Ct		Manual	19	21	Manual	0.455748
184	24 (26-2)	TNF alpha	SYBR	Unknown	31.1693	83.3	Auto Tm	28.7204	32.179	3.2698	31.0025	31.0241	0.135684	Manual Ct		Manual	19	21	Manual	0.455748
208	24 (26-2)	TNF alpha	SYBR	Unknown	30.9006	83.3	Auto Tm	35.2199	32.179	3.2698	31.0025	31.0241	0.135684	Manual Ct		Manual	19	21	Manual	0.455748
161	25 (27-1)	TNF alpha	SYBR	Unknown	30.6238	83.3	Auto Tm	43.4531	43.2132	0.53826	30.6238	30.6312	0.0164663	Manual Ct		Manual	19	21	Manual	0.455748
185	25 (27-1)	TNF alpha	SYBR	Unknown	30.65	83.3	Auto Tm	42.5967	43.2132	0.53826	30.6238	30.6312	0.0164663	Manual Ct		Manual	19	21	Manual	0.455748
209	25 (27-1)	TNF alpha	SYBR	Unknown	30.6197	83.3	Auto Tm	43.5898	43.2132	0.53826	30.6238	30.6312	0.0164663	Manual Ct		Manual	19	21	Manual	0.455748
162	26 (27-2)	TNF alpha	SYBR	Unknown	30.9621	83.2	Auto Tm	33.6122	34.3186	10.0739	30.9621	30.9734	0.393502	Manual Ct		Manual	19	21	Manual	0.455748
186	26 (27-2)	TNF alpha	SYBR	Unknown	30.5857	83.2	Auto Tm	44.7272	34.3186	10.0739	30.9621	30.9734	0.393502	Manual Ct		Manual	19	21	Manual	0.455748
210	26 (27-2)	TNF alpha	SYBR	Unknown	31.3725	83.2	Auto Tm	24.6166	34.3186	10.0739	30.9621	30.9734	0.393502	Manual Ct		Manual	19	21	Manual	0.455748
163	27 (27-3)	TNF alpha	SYBR	Unknown	31.4791	83.2	Auto Tm	22.7027	21.5399	6.84326	31.4791	31.5977	0.45309	Manual Ct		Manual	19	21	Manual	0.455748
187	27 (27-3)	TNF alpha	SYBR	Unknown	31.2157	83.2	Auto Tm	27.7273	21.5399	6.84326	31.4791	31.5977	0.45309	Manual Ct		Manual	19	21	Manual	0.455748
211	27 (27-3)	TNF alpha	SYBR	Unknown	32.0983	83.2	Auto Tm	14.1898	21.5399	6.84326	31.4791	31.5977	0.45309	Manual Ct		Manual	19	21	Manual	0.455748
164	28 (28-1)	TNF alpha	SYBR	Unknown	31.8815	83.2	Auto Tm	16.7276	17.524	3.32744	31.8815	31.8357	0.245219	Manual Ct		Manual	19	21	Manual	0.455748
188	28 (28-1)	TNF alpha	SYBR	Unknown	32.0547	83.2	Auto Tm	14.667	17.524	3.32744	31.8815	31.8357	0.245219	Manual Ct		Manual	19	21	Manual	0.455748
212	28 (28-1)	TNF alpha	SYBR	Unknown	31.5708	83.2	Auto Tm	21.1773	17.524	3.32744	31.8815	31.8357	0.245219	Manual Ct		Manual	19	21	Manual	0.455748
165	29 (28-2)	TNF alpha	SYBR	Unknown	31.1324	83.2	Auto Tm	29.5375	25.3877	5.67143	31.217	31.3561	0.317024	Manual Ct		Manual	19	21	Manual	0.455748
189	29 (28-2)	TNF alpha	SYBR	Unknown	31.217	83.2	Auto Tm	27.7002	25.3877	5.67143	31.217	31.3561	0.317024	Manual Ct		Manual	19	21	Manual	0.455748
213	29 (28-2)	TNF alpha	SYBR	Unknown	31.7189	83	Auto Tm	18.9254	25.3877	5.67143	31.217	31.3561	0.317024	Manual Ct		Manual	19	21	Manual	0.455748
91	3 (12-1)	TNF alpha	SYBR	Unknown	31.265	83.2	Auto Tm	26.7099	25.1605	2.38851	31.2822	31.3478	0.128824	Manual Ct		Manual	19	21	Manual	0.455748
115	3 (12-1)	TNF alpha	SYBR	Unknown	31.2822	83.2	Auto Tm	26.3618	25.1605	2.38851	31.2822	31.3478	0.128824	Manual Ct		Manual	19	21	Manual	0.455748
139	3 (12-1)	TNF alpha	SYBR	Unknown	31.4962	83.2	Auto Tm	22.4098	25.1605	2.38851	31.2822	31.3478	0.128824	Manual Ct		Manual	19	21	Manual	0.455748
166	30 (28-3)	TNF alpha	SYBR	Unknown	31.9762	83	Auto Tm	15.568	14.1686	2.0719	32.0121	32.1103	0.201974	Manual Ct		Manual	19	21	Manual	0.455748
190	30 (28-3)	TNF alpha	SYBR	Unknown	32.0121	83	Auto Tm	15.1493	14.1686	2.0719	32.0121	32.1103	0.201974	Manual Ct		Manual	19	21	Manual	0.455748
214	30 (28-3)	TNF alpha	SYBR	Unknown	32.3426	83	Auto Tm	11.7884	14.1686	2.0719	32.0121	32.1103	0.201974	Manual Ct		Manual	19	21	Manual	0.455748
167	31 (29-1)	TNF alpha	SYBR	Unknown	28.2731	83.2	Auto Tm	258.753	275.455	27.1607	28.2626	28.1948	0.126631	Manual Ct		Manual	19	21	Manual	0.455748
191	31 (29-1)	TNF alpha	SYBR	Unknown	28.2626	83.2	Auto Tm	260.817	275.455	27.1607	28.2626	28.1948	0.126631	Manual Ct		Manual	19	21	Manual	0.455748
215	31 (29-1)	TNF alpha	SYBR	Unknown	28.0487	83.2	Auto Tm	306.795	275.455	27.1607	28.2626	28.1948	0.126631	Manual Ct		Manual	19	21	Manual	0.455748
168	32 (29-2)	TNF alpha	SYBR	Unknown	30.3497	82.9	Auto Tm	53.5011	56.1421	13.0156	30.3497	30.3094	0.300835	Manual Ct		Manual	19	21	Manual	0.455748
192	32 (29-2)	TNF alpha	SYBR	Unknown	30.588	82.9	Auto Tm	44.6495	56.1421	13.0156	30.3497	30.3094	0.300835	Manual Ct		Manual	19	21	Manual	0.455748
216	32 (29-2)	TNF alpha	SYBR	Unknown	29.9904	82.9	Auto Tm	70.2756	56.1421	13.0156	30.3497	30.3094	0.300835	Manual Ct		Manual	19	21	Manual	0.455748
217	33 (30-1)	TNF alpha	SYBR	Unknown	30.9414	83.1	Auto Tm	34.1457	42.5307	10.3318	30.7537	30.6769	0.310033	Manual Ct		Manual	19	21	Manual	0.455748
241	33 (30-1)	TNF alpha	SYBR	Unknown	30.3357	82.9	Auto Tm	54.0727	42.5307	10.3318	30.7537	30.6769	0.310033	Manual Ct		Manual	19	21	Manual	0.455748
265	33 (30-1)	TNF alpha	SYBR	Unknown	30.7537	82.9	Auto Tm	39.3738	42.5307	10.3318	30.7537	30.6769	0.310033	Manual Ct		Manual	19	21	Manual	0.455748
218	34 (30-2)	TNF alpha	SYBR	Unknown	28.4377	83.1	Auto Tm	228.37	46.4423	32.8015	28.4736	28.5826	0.220572	Manual Ct		Manual	19	21	Manual	0.455748
242	34 (30-2)	TNF alpha	SYBR	Unknown	28.8364	83.1	Auto Tm	168.733	46.4423	32.8015	28.4736	28.5826	0.220572	Manual Ct		Manual	19	21	Manual	0.455748
266	34 (30-2)	TNF alpha	SYBR	Unknown	28.4736	83.1	Auto Tm	222.224	46.4423	32.8015	28.4736	28.5826	0.220572	Manual Ct		Manual	19	21	Manual	0.455748
219	35 (31-1)	TNF alpha	SYBR	Unknown	28.8235	83.1	Auto Tm	170.394	156.902	12.842	28.9441	28.9351	0.107378	Manual Ct		Manual	19	21	Manual	0.455748
243	35 (31-1)	TNF alpha	SYBR	Unknown	29.0377	83.1	Auto Tm	144.828	156.902	12.842	28.9441	28.9351	0.107378	Manual Ct		Manual	19	21	Manual	0.455748
267	35 (31-1)	TNF alpha	SYBR	Unknown	28.9441	83.1	Auto Tm	155.486	156.902	12.842	28.9441	28.9351	0.107378	Manual Ct		Manual	19	21	Manual	0.455748
220	36 (31-2)	TNF alpha	SYBR	Unknown	30.2376	83.1	Auto Tm	58.2526	80.04	21.8754	29.8219	29.853	0.370022	Manual Ct		Manual	19	21	Manual	0.455748
244	36 (31-2)	TNF alpha	SYBR	Unknown	29.8219	83.1	Auto Tm	79.8649	80.04	21.8754	29.8219	29.853	0.370022	Manual Ct		Manual	19	21	Manual	0.455748
268	36 (31-2)	TNF alpha	SYBR	Unknown	29.4995	83.1	Auto Tm	102.002	80.04	21.8754	29.8219	29.853	0.370022	Manual Ct		Manual	19	21	Manual	0.455748
221	37 (32-1)	TNF alpha	SYBR	Unknown	31.7402	83.1	Auto Tm	18.6216	24.6624	8.00834	31.5435	31.4135	0.407519	Manual Ct		Manual	19	21	Manual	0.455748
245	37 (32-1)	TNF alpha	SYBR	Unknown	31.5435	83.1	Auto Tm	21.6193	24.6624	8.00834	31.5435	31.4135	0.407519	Manual Ct		Manual	19	21	Manual	0.455748
269	37 (32-1)	TNF alpha	SYBR	Unknown	30.9569	83.1	Auto Tm	33.7462	24.6624	8.00834	31.5435	31.4135	0.407519	Manual Ct		Manual	19	21	Manual	0.455748
222	38 (A)	TNF alpha	SYBR	Unknown	31.1911	83.4	Auto Tm	28.2502	28.1512	0.140139	31.1957	31.1957	0.00655872	Manual Ct		Manual	19	21	Manual	0.455748
270	38 (A)	TNF alpha	SYBR	Unknown	31.2004	83.1	Auto Tm	28.0521	28.1512	0.140139	31.1957	31.1957	0.00655872	Manual Ct		Manual	19	21	Manual	0.455748
270	38 (A)	TNF alpha	SYBR	Unknown	31.2004	83.1	Auto Tm	28.0521	28.1512	0.140139	31.1957	31.1957	0.00655872	Manual Ct		Manual	19	21	Manual	0.455748
223	39 (G)	TNF alpha	SYBR	Unknown	31.2933	83.4	Auto Tm	26.1417	18.8882	6.43797	31.886	31.7698	0.430321	Manual Ct		Manual	19	21	Manual	0.455748
247	39 (G)	TNF alpha	SYBR	Unknown	31.886	83.1	Auto Tm	16.6711	18.8882	6.43797	31.886	31.7698	0.430321	Manual Ct		Manual	19	21	Manual	0.455748
271	39 (G)	TNF alpha	SYBR	Unknown	32.1301	83.1	Auto Tm	13.8517	18.8882	6.43797	31.886	31.7698	0.430321	Manual Ct		Manual	19	21	Manual	0.455748
92	4 (12-2)	TNF alpha	SYBR	Unknown	30.0543	83.2	Auto Tm	66.947	50.2828	14.746	30.5783	30.4672	0.370004	Manual Ct		Manual	19	21	Manual	0.455748
116	4 (12-2)	TNF alpha	SYBR	Unknown	30.5783	83.2	Auto Tm	44.979	50.2828	14.746	30.5783	30.4672	0.370004	Manual Ct		Manual	19	21	Manual	0.455748
140	4 (12-2)	TNF alpha	SYBR	Unknown	30.7689	83.2	Auto Tm	38.9222	50.2828	14.746	30.5783	30.4672	0.370004	Manual Ct		Manual	19	21	Manual	0.455748
224	40 (H)	TNF alpha	SYBR	Unknown	30.5184	83.4	Auto Tm	47.0731	44.1801	10.5302	30.5184	30.6292	0.335594	Manual Ct		Manual	19	21	Manual	0.455748
248	40 (H)	TNF alpha	SYBR	Unknown	30.3631	83.4	Auto Tm	52.9614	44.1801	10.5302	30.5184	30.6292	0.335594	Manual Ct		Manual	19	21	Manual	0.455748
272	40 (H)	TNF alpha	SYBR	Unknown	31.0062	83.4	Auto Tm	32.5057	44.1801	10.5302	30.5184	30.6292	0.335594	Manual Ct		Manual	19	21	Manual	0.455748
93	5 (13-1)	TNF alpha	SYBR	Unknown	31.0591	83	Auto Tm	31.2277	25.5634	7.34317	31.1936	31.3641	0.417316	Manual Ct		Manual	19	21	Manual	0.455748
117	5 (13-1)	TNF alpha	SYBR	Unknown	31.1936	83.2	Auto Tm	28.1955	25.5634	7.34317	31.1936	31.3641	0.417316	Manual Ct		Manual	19	21	Manual	0.455748
141	5 (13-1)	TNF alpha	SYBR	Unknown	31.8397	83.2	Auto Tm	17.2669	25.5634	7.34317	31.1936	31.3641	0.417316	Manual Ct		Manual	19	21	Manual	0.455748
94	6 (14-1)	TNF alpha	SYBR	Unknown	30.9085	83	Auto Tm	35.0094	41.3892	6.3114	30.6835	30.6983	0.203197	Manual Ct		Manual	19	21	Manual	0.455748
118	6 (14-1)	TNF alpha	SYBR	Unknown	30.5029	83	Auto Tm	47.6299	41.3892	6.3114	30.6835	30.6983	0.203197	Manual Ct		Manual	19	21	Manual	0.455748
142	6 (14-1)	TNF alpha	SYBR	Unknown	30.6835	83	Auto Tm	41.5281	41.3892	6.3114	30.6835	30.6983	0.203197	Manual Ct		Manual	19	21	Manual	0.455748
95	7 (15-1)	TNF alpha	SYBR	Unknown	30.8372	82.9	Auto Tm	36.954	38.8034	7.13099	30.8372	30.7873	0.236819	Manual Ct		Manual	19	21	Manual	0.455748
119	7 (15-1)	TNF alpha	SYBR	Unknown	30.9952	82.9	Auto Tm	32.7793	38.8034	7.13099	30.8372	30.7873	0.236819	Manual Ct		Manual	19	21	Manual	0.455748
143	7 (15-1)	TNF alpha	SYBR	Unknown	30.5295	82.9	Auto Tm	46.6769	38.8034	7.13099	30.8372	30.7873	0.236819	Manual Ct		Manual	19	21	Manual	0.455748
96	8 (15-2)	TNF alpha	SYBR	Unknown	29.842	82.9	Auto Tm	78.6546	75.4162	9.94071	29.842	29.9054	0.179806	Manual Ct		Manual	19	21	Manual	0.455748
120	8 (15-2)	TNF alpha	SYBR	Unknown	29.7659	82.9	Auto Tm	83.3339	75.4162	9.94071	29.842	29.9054	0.179806	Manual Ct		Manual	19	21	Manual	0.455748
144	8 (15-2)	TNF alpha	SYBR	Unknown	30.1083	82.9	Auto Tm	64.2601	75.4162	9.94071	29.842	29.9054	0.179806	Manual Ct		Manual	19	21	Manual	0.455748
145	9 (16-1)	TNF alpha	SYBR	Unknown	31.0519	82.9	Auto Tm	31.3972	28.1937	2.90392	31.2289	31.1983	0.133692	Manual Ct		Manual	19	21	Manual	0.455748
169	9 (16-1)	TNF alpha	SYBR	Unknown	31.314	82.9	Auto Tm	25.734	28.1937	2.90392	31.2289	31.1983	0.133692	Manual Ct		Manual	19	21	Manual	0.455748
193	9 (16-1)	TNF alpha	SYBR	Unknown	31.2289	83.1	Auto Tm	27.45	28.1937	2.90392	31.2289	31.1983	0.133692	Manual Ct		Manual	19	21	Manual	0.455748
372	Gene 2 Standard (1)	TNF alpha	SYBR	Standard	35.492	82.8	Auto Tm	1						Manual Ct		Manual	19	21	Manual	0.455748
369	Gene 2 Standard (10)	TNF alpha	SYBR	Standard	32.371	83	Auto Tm	10						Manual Ct		Manual	19	21	Manual	0.455748
370	Gene 2 Standard (10)	TNF alpha	SYBR	Standard	32.9496	83	Auto Tm	10						Manual Ct		Manual	19	21	Manual	0.455748
367	Gene 2 Standard (100)	TNF alpha	SYBR	Standard	29.5023	83.9	Auto Tm	100						Manual Ct		Manual	19	21	Manual	0.455748
368	Gene 2 Standard (100)	TNF alpha	SYBR	Standard	29.4481	83.9	Auto Tm	100						Manual Ct		Manual	19	21	Manual	0.455748
380	NTC Gene 2	TNF alpha	SYBR	NTC	Undetermined	61.9	Auto Tm	0						Manual Ct		Manual	19	21	Manual	0.455748						TRUE
383	RT Negative 2	TNF alpha	SYBR	NTC	Undetermined	61.9	Auto Tm	0						Manual Ct		Manual	19	21	Manual	0.455748						TRUE
Slope	-3.03367	cycles/log decade
Y-Intercept		35.593
R^2		0.992126
		TNF-a	18S
	Mouse ID	Qty Mean	Qty Mean	Ratio	Normalized values	Mice groups										Mean	STDEV	SE
1	11-1 (4%+RC+HFHC)	45.9513	16.1897	2.83831	0.947899	18%- 4 WEEKS	0.498379	0.678594	0.314948							0.497307	0.181826	0.104977
2	11-2 (4%+RC+HFHC)	54.1175	17.3774	3.11425	1.04005	4%- 4 WEEKS			2.55066	1.45464						2.00265	0.775004	0.387502	P = 0.133
3	12-1 (18%+RC+HFHC)	25.1605	29.3828	0.8563	0.285975
4	12-2 (18%+RC+HFHC)	50.2828	18.8159	2.67236	0.892478	18%+RC - 4 WEEKS	0.249174	0.41191	0.254988							0.305357	0.0923236	0.053303
5	13-1 (4%+RC+RC)	25.5634	31.6372	0.808015	0.26985	4%+RC - 4 WEEKS	0.648466	0.508561	0.315598							0.490875	0.167137	0.0964965	P = 0.168
6	14-1 (18%+RC+RC)	41.3892	20.4911	2.01986	0.674566
7	15-1 (4%+RC+HFHC)	38.8034	15.311	2.53434	0.846385	18%+RC+RC	0.674566	0.698842	0.907473	0.45127	0.518631	0.186982	0.48279			0.560079	0.227953	0.0861583
8	15-2 (4%+RC+HFHC)	75.4162	19.3291	3.9017	1.30303	18%+RC+HFHC		0.892478	1.8075	2.1	1.08873					1.47218	0.574364	0.287182	*P = 0.05
9	16-1 (4%+RC+RC)	28.1937	19.7214	1.4296	0.477438
10	17-1 (18%+RC+HFHC)	117.616	21.7315	5.41222	1.8075	4%+RC+RC	0.26985	0.477438	1.48132	0.379484	0.593075	0.778319				0.663247	0.437542	0.178626
11	17-2 (18%+RC+HFHC)	339.658	20.1731	16.8372	5.62305	4%+RC+HFHC	0.947899	1.04005	0.846385	1.30303	1.77517	0.603175	0.739417	0.455953	0.645465	0.928505	0.406461	0.135487	P = 0.141
12	18-1 (18%+RC+RC)	38.6328	18.462	2.09255	0.698842
13	19-1 (4%+RC+HFHC)	92.6071	17.4224	5.31541	1.77517
14	20-1 (4%+RC+RC)	76.1695	17.1726	4.43554	1.48132											Mean		SE
15	21-1 (4%+RC+HFHC)	37.103	20.5432	1.8061	0.603175											0.497307	1	0.104977	0.211091
16	21-2 (4%+RC+HFHC)	46.6977	21.0915	2.21405	0.739417											2.00265	4.027	0.387502	0.7792
17	22-1 (4%+RC+RC)	23.4322	20.6215	1.1363	0.379484
18	23-1 (4%+RC+HFHC)	36.947	27.0621	1.36527	0.455953											0.305357	0.614022	0.053303	0.107183
19	23-2 (4%+RC+HFHC)	51.8546	26.8298	1.93272	0.645465											0.490875	0.987067	0.0964965	0.194038
20	24-1 (4%+RC+RC)	29.3596	16.5327	1.77585	0.593075
21	24-2 (4%+RC+RC)	46.5569	19.9769	2.33053	0.778319											0.560079	1.12622	0.0861583	0.17325
22	25-2 (18%+RC+HFHC)	69.6467	21.364	3.26001	1.08873											1.47218	2.9603	0.287182	0.577474
23	26-1 (18%+RC+RC)	50.2343	18.4871	2.71726	0.907473
24	26-2 (18%+RC+RC)	32.179	23.8143	1.35125	0.45127											0.663247	1.33368	0.178626	0.359186
25	27-1 (4%+RC - 5 WEEKS)	43.2132	22.2552	1.94171	0.648466											0.928505	1.86707	0.135487	0.272441
26	27-2 (4%+RC - 5 WEEKS)	34.3186	22.5366	1.52279	0.508561
27	27-3 (4%+RC - 5 WEEKS)	21.5399	22.7935	0.945001	0.315598
28	28-1 (18%+RC - 4 WEEKS)	17.524	23.4873	0.746104	0.249174
29	28-2 (18%+RC - 4 WEEKS)	25.3877	20.5837	1.23339	0.41191
30	28-3 (18%+RC - 4 WEEKS)	14.1686	18.557	0.763514	0.254988		0.498379	5.23529		0.249174	0.648466		0.674566	0.285975		0.26985	0.947899
31	29-1 (4%- 4 WEEKS)	275.455	17.5716	15.6761	5.23529		0.678594	0.924465		0.41191	0.508561		0.698842	0.892478		0.477438	1.04005
32	29-2 (4%- 4 WEEKS)	56.1421	20.2815	2.76814	0.924465		0.314948	2.55066		0.254988	0.315598		0.907473	1.8075		1.48132	0.846385
33	30-1 (18%- 4 WEEKS)	42.5307	28.5	1.4923	0.498379			1.45464					0.45127	5.62305		0.379484	1.30303
34	30-2 (18%- 4 WEEKS)	46.4423	22.8563	2.03193	0.678594								0.518631	1.08873		0.593075	1.77517
35	31-1 (4%- 4 WEEKS)	156.902	20.5437	7.63749	2.55066								0.186982			0.778319	0.603175
36	31-2 (4%- 4 WEEKS)	80.04	18.3761	4.35566	1.45464								0.48279				0.739417
37	32-1 (18%- 4 WEEKS)	24.6624	26.1516	0.943053	0.314948												0.455953
38	A (18%+RC+RC)	28.1512	18.1276	1.55295	0.518631												0.645465
39	G (18%+RC+RC)	18.8882	33.7358	0.559884	0.186982
40	H (18%+RC+RC)	44.1801	30.5612	1.44563	0.48279
				2.99432

## Sheet: IL1a
Well	Sample Name	Detector Name	Reporter	Task	Ct	Tm Value	Tm Type	Quantity	Qty Mean	Qty StdDev	Ct Median	Ct Mean	Ct StdDev	Ct Type	Template Name	Baseline Type	Baseline Start	Baseline Stop	Threshold Type	Threshold	FOS	HMD	LME	EW	BPR	NAW	HNS	HRN	EAF	BAF	TAF	CAF
225	1 (11-1)	IL-1a	SYBR	Unknown	26.6007	82.8	Auto Tm	62.5111	68.0047	7.2908	26.5449	26.4951	0.137561	Manual Ct		Manual	10	21	Manual	0.3839
249	1 (11-1)	IL-1a	SYBR	Unknown	26.5449	82.8	Auto Tm	65.2269	68.0047	7.2908	26.5449	26.4951	0.137561	Manual Ct		Manual	10	21	Manual	0.3839
273	1 (11-1)	IL-1a	SYBR	Unknown	26.3395	82.8	Auto Tm	76.2761	68.0047	7.2908	26.5449	26.4951	0.137561	Manual Ct		Manual	10	21	Manual	0.3839
234	10 (17-1)	IL-1a	SYBR	Unknown	26.2277	82.7	Auto Tm	83.0609	81.9657	5.49435	26.2277	26.2471	0.0889773	Manual Ct		Manual	10	21	Manual	0.3839
258	10 (17-1)	IL-1a	SYBR	Unknown	26.3442	82.7	Auto Tm	76.0062	81.9657	5.49435	26.2277	26.2471	0.0889773	Manual Ct		Manual	10	21	Manual	0.3839
282	10 (17-1)	IL-1a	SYBR	Unknown	26.1694	82.7	Auto Tm	86.8299	81.9657	5.49435	26.2277	26.2471	0.0889773	Manual Ct		Manual	10	21	Manual	0.3839
235	11 (17-2)	IL-1a	SYBR	Unknown	24.9822	82.7	Auto Tm	214.53	213.592	1.03518	24.9869	24.988	0.00636493	Manual Ct		Manual	10	21	Manual	0.3839
259	11 (17-2)	IL-1a	SYBR	Unknown	24.9869	82.7	Auto Tm	213.764	213.592	1.03518	24.9869	24.988	0.00636493	Manual Ct		Manual	10	21	Manual	0.3839
283	11 (17-2)	IL-1a	SYBR	Unknown	24.9948	82.7	Auto Tm	212.481	213.592	1.03518	24.9869	24.988	0.00636493	Manual Ct		Manual	10	21	Manual	0.3839
236	12 (18-1)	IL-1a	SYBR	Unknown	27.2393	82.7	Auto Tm	38.4296	38.8292	1.21291	27.2393	27.2262	0.0407317	Manual Ct		Manual	10	21	Manual	0.3839
260	12 (18-1)	IL-1a	SYBR	Unknown	27.2587	82.7	Auto Tm	37.8666	38.8292	1.21291	27.2393	27.2262	0.0407317	Manual Ct		Manual	10	21	Manual	0.3839
284	12 (18-1)	IL-1a	SYBR	Unknown	27.1805	82.7	Auto Tm	40.1916	38.8292	1.21291	27.2393	27.2262	0.0407317	Manual Ct		Manual	10	21	Manual	0.3839
237	13 (19-1)	IL-1a	SYBR	Unknown	25.9826	82.7	Auto Tm	100.112	94.7969	7.09078	26.0168	26.0567	0.100186	Manual Ct		Manual	10	21	Manual	0.3839
261	13 (19-1)	IL-1a	SYBR	Unknown	26.1707	82.7	Auto Tm	86.7457	94.7969	7.09078	26.0168	26.0567	0.100186	Manual Ct		Manual	10	21	Manual	0.3839
285	13 (19-1)	IL-1a	SYBR	Unknown	26.0168	82.7	Auto Tm	97.5333	94.7969	7.09078	26.0168	26.0567	0.100186	Manual Ct		Manual	10	21	Manual	0.3839
238	14 (20-1)	IL-1a	SYBR	Unknown	26.417	82.7	Auto Tm	71.9036	72.0724	2.93365	26.417	26.4146	0.0533656	Manual Ct		Manual	10	21	Manual	0.3839
262	14 (20-1)	IL-1a	SYBR	Unknown	26.3601	82.4	Auto Tm	75.0868	72.0724	2.93365	26.417	26.4146	0.0533656	Manual Ct		Manual	10	21	Manual	0.3839
286	14 (20-1)	IL-1a	SYBR	Unknown	26.4668	82.4	Auto Tm	69.2268	72.0724	2.93365	26.417	26.4146	0.0533656	Manual Ct		Manual	10	21	Manual	0.3839
239	15 (21-1)	IL-1a	SYBR	Unknown	26.5799	82.4	Auto Tm	63.5113	58.7876	4.24013	26.7095	26.6836	0.093463	Manual Ct		Manual	10	21	Manual	0.3839
263	15 (21-1)	IL-1a	SYBR	Unknown	26.7095	82.4	Auto Tm	57.5407	58.7876	4.24013	26.7095	26.6836	0.093463	Manual Ct		Manual	10	21	Manual	0.3839
287	15 (21-1)	IL-1a	SYBR	Unknown	26.7614	82.4	Auto Tm	55.3107	58.7876	4.24013	26.7095	26.6836	0.093463	Manual Ct		Manual	10	21	Manual	0.3839
240	16 (21-2)	IL-1a	SYBR	Unknown	26.4221	82.4	Auto Tm	71.6247	75.3015	3.45261	26.3476	26.3573	0.0605236	Manual Ct		Manual	10	21	Manual	0.3839
264	16 (21-2)	IL-1a	SYBR	Unknown	26.3476	82.4	Auto Tm	75.8053	75.3015	3.45261	26.3476	26.3573	0.0605236	Manual Ct		Manual	10	21	Manual	0.3839
288	16 (21-2)	IL-1a	SYBR	Unknown	26.3022	82.4	Auto Tm	78.4746	75.3015	3.45261	26.3476	26.3573	0.0605236	Manual Ct		Manual	10	21	Manual	0.3839
289	17 (22-1)	IL-1a	SYBR	Unknown	27.5121	82.3	Auto Tm	31.2178	32.0967	1.04253	27.4869	27.4761	0.0423956	Manual Ct		Manual	10	21	Manual	0.3839
313	17 (22-1)	IL-1a	SYBR	Unknown	27.4869	82.3	Auto Tm	31.8238	32.0967	1.04253	27.4869	27.4761	0.0423956	Manual Ct		Manual	10	21	Manual	0.3839
337	17 (22-1)	IL-1a	SYBR	Unknown	27.4294	82.1	Auto Tm	33.2486	32.0967	1.04253	27.4869	27.4761	0.0423956	Manual Ct		Manual	10	21	Manual	0.3839
290	18 (23-1)	IL-1a	SYBR	Unknown	27.9338	82.3	Auto Tm	22.6402	22.3948	0.212836	27.9547	27.9481	0.0124407	Manual Ct		Manual	10	21	Manual	0.3839
314	18 (23-1)	IL-1a	SYBR	Unknown	27.9547	82.3	Auto Tm	22.2821	22.3948	0.212836	27.9547	27.9481	0.0124407	Manual Ct		Manual	10	21	Manual	0.3839
338	18 (23-1)	IL-1a	SYBR	Unknown	27.9559	82.3	Auto Tm	22.262	22.3948	0.212836	27.9547	27.9481	0.0124407	Manual Ct		Manual	10	21	Manual	0.3839
291	19 (23-2)	IL-1a	SYBR	Unknown	27.0626	82.6	Auto Tm	43.9692	43.6586	1.72794	27.0626	27.0726	0.0522471	Manual Ct		Manual	10	21	Manual	0.3839
315	19 (23-2)	IL-1a	SYBR	Unknown	27.026	82.3	Auto Tm	45.2102	43.6586	1.72794	27.0626	27.0726	0.0522471	Manual Ct		Manual	10	21	Manual	0.3839
339	19 (23-2)	IL-1a	SYBR	Unknown	27.1291	82.3	Auto Tm	41.7964	43.6586	1.72794	27.0626	27.0726	0.0522471	Manual Ct		Manual	10	21	Manual	0.3839
226	2 (11-2)	IL-1a	SYBR	Unknown	26.0441	82.8	Auto Tm	95.5322	104.397	8.42039	25.9154	25.9305	0.106858	Manual Ct		Manual	10	21	Manual	0.3839
250	2 (11-2)	IL-1a	SYBR	Unknown	25.8319	82.8	Auto Tm	112.288	104.397	8.42039	25.9154	25.9305	0.106858	Manual Ct		Manual	10	21	Manual	0.3839
274	2 (11-2)	IL-1a	SYBR	Unknown	25.9154	82.8	Auto Tm	105.371	104.397	8.42039	25.9154	25.9305	0.106858	Manual Ct		Manual	10	21	Manual	0.3839
292	20 (24-1)	IL-1a	SYBR	Unknown	28.4099	82.6	Auto Tm	15.7521	17.9436	2.40353	28.267	28.2467	0.174234	Manual Ct		Manual	10	21	Manual	0.3839
316	20 (24-1)	IL-1a	SYBR	Unknown	28.0632	82.3	Auto Tm	20.5141	17.9436	2.40353	28.267	28.2467	0.174234	Manual Ct		Manual	10	21	Manual	0.3839
340	20 (24-1)	IL-1a	SYBR	Unknown	28.267	82.3	Auto Tm	17.5647	17.9436	2.40353	28.267	28.2467	0.174234	Manual Ct		Manual	10	21	Manual	0.3839
293	21 (24-2)	IL-1a	SYBR	Unknown	26.492	82.6	Auto Tm	67.9076	66.6241	6.67323	26.492	26.5216	0.133797	Manual Ct		Manual	10	21	Manual	0.3839
317	21 (24-2)	IL-1a	SYBR	Unknown	26.6677	82.6	Auto Tm	59.4023	66.6241	6.67323	26.492	26.5216	0.133797	Manual Ct		Manual	10	21	Manual	0.3839
341	21 (24-2)	IL-1a	SYBR	Unknown	26.405	82.6	Auto Tm	72.5623	66.6241	6.67323	26.492	26.5216	0.133797	Manual Ct		Manual	10	21	Manual	0.3839
294	22 (25-2)	IL-1a	SYBR	Unknown	27.0949	82.6	Auto Tm	42.8988	47.2015	3.74017	26.9195	26.9723	0.106536	Manual Ct		Manual	10	21	Manual	0.3839
318	22 (25-2)	IL-1a	SYBR	Unknown	26.9195	82.6	Auto Tm	49.0312	47.2015	3.74017	26.9195	26.9723	0.106536	Manual Ct		Manual	10	21	Manual	0.3839
342	22 (25-2)	IL-1a	SYBR	Unknown	26.9024	82.6	Auto Tm	49.6747	47.2015	3.74017	26.9195	26.9723	0.106536	Manual Ct		Manual	10	21	Manual	0.3839
295	23 (26-1)	IL-1a	SYBR	Unknown	27.435	82.6	Auto Tm	33.1079	35.661	2.23963	27.304	27.3392	0.0838741	Manual Ct		Manual	10	21	Manual	0.3839
319	23 (26-1)	IL-1a	SYBR	Unknown	27.2787	82.6	Auto Tm	37.2943	35.661	2.23963	27.304	27.3392	0.0838741	Manual Ct		Manual	10	21	Manual	0.3839
343	23 (26-1)	IL-1a	SYBR	Unknown	27.304	82.6	Auto Tm	36.5808	35.661	2.23963	27.304	27.3392	0.0838741	Manual Ct		Manual	10	21	Manual	0.3839
296	24 (26-2)	IL-1a	SYBR	Unknown	28.0122	82.8	Auto Tm	21.3266	19.3508	3.37548	28.0156	28.1543	0.243158	Manual Ct		Manual	10	21	Manual	0.3839
320	24 (26-2)	IL-1a	SYBR	Unknown	28.0156	82.6	Auto Tm	21.2726	19.3508	3.37548	28.0156	28.1543	0.243158	Manual Ct		Manual	10	21	Manual	0.3839
344	24 (26-2)	IL-1a	SYBR	Unknown	28.4351	82.6	Auto Tm	15.4533	19.3508	3.37548	28.0156	28.1543	0.243158	Manual Ct		Manual	10	21	Manual	0.3839
297	25 (27-1)	IL-1a	SYBR	Unknown	27.146	82.8	Auto Tm	41.2616	43.3653	5.32776	27.146	27.0871	0.157087	Manual Ct		Manual	10	21	Manual	0.3839
321	25 (27-1)	IL-1a	SYBR	Unknown	27.2062	82.8	Auto Tm	39.4106	43.3653	5.32776	27.146	27.0871	0.157087	Manual Ct		Manual	10	21	Manual	0.3839
345	25 (27-1)	IL-1a	SYBR	Unknown	26.9091	82.8	Auto Tm	49.4237	43.3653	5.32776	27.146	27.0871	0.157087	Manual Ct		Manual	10	21	Manual	0.3839
298	26 (27-2)	IL-1a	SYBR	Unknown	26.6661	82.8	Auto Tm	59.4725	59.4484	0.755178	26.6661	26.6667	0.0166794	Manual Ct		Manual	10	21	Manual	0.3839
322	26 (27-2)	IL-1a	SYBR	Unknown	26.6837	82.8	Auto Tm	58.6815	59.4484	0.755178	26.6661	26.6667	0.0166794	Manual Ct		Manual	10	21	Manual	0.3839
346	26 (27-2)	IL-1a	SYBR	Unknown	26.6504	82.8	Auto Tm	60.1912	59.4484	0.755178	26.6661	26.6667	0.0166794	Manual Ct		Manual	10	21	Manual	0.3839
299	27 (27-3)	IL-1a	SYBR	Unknown	26.6515	82.8	Auto Tm	60.1408	62.3136	3.76756	26.6515	26.6065	0.0780658	Manual Ct		Manual	10	21	Manual	0.3839
323	27 (27-3)	IL-1a	SYBR	Unknown	26.6516	82.8	Auto Tm	60.1361	62.3136	3.76756	26.6515	26.6065	0.0780658	Manual Ct		Manual	10	21	Manual	0.3839
347	27 (27-3)	IL-1a	SYBR	Unknown	26.5163	82.8	Auto Tm	66.664	62.3136	3.76756	26.6515	26.6065	0.0780658	Manual Ct		Manual	10	21	Manual	0.3839
300	28 (28-1)	IL-1a	SYBR	Unknown	27.9891	82.8	Auto Tm	21.7054	21.3123	0.342447	28.023	28.0132	0.0209991	Manual Ct		Manual	10	21	Manual	0.3839
324	28 (28-1)	IL-1a	SYBR	Unknown	28.0276	82.8	Auto Tm	21.0787	21.3123	0.342447	28.023	28.0132	0.0209991	Manual Ct		Manual	10	21	Manual	0.3839
348	28 (28-1)	IL-1a	SYBR	Unknown	28.023	82.8	Auto Tm	21.1529	21.3123	0.342447	28.023	28.0132	0.0209991	Manual Ct		Manual	10	21	Manual	0.3839
301	29 (28-2)	IL-1a	SYBR	Unknown	26.9842	82.8	Auto Tm	46.6753	51.3314	4.08881	26.8178	26.8622	0.106901	Manual Ct		Manual	10	21	Manual	0.3839
325	29 (28-2)	IL-1a	SYBR	Unknown	26.8178	82.8	Auto Tm	52.9817	51.3314	4.08881	26.8178	26.8622	0.106901	Manual Ct		Manual	10	21	Manual	0.3839
349	29 (28-2)	IL-1a	SYBR	Unknown	26.7847	82.8	Auto Tm	54.3371	51.3314	4.08881	26.8178	26.8622	0.106901	Manual Ct		Manual	10	21	Manual	0.3839
227	3 (12-1)	IL-1a	SYBR	Unknown	27.3368	83	Auto Tm	35.6795	36.0417	0.877804	27.3368	27.3238	0.0317739	Manual Ct		Manual	10	21	Manual	0.3839
251	3 (12-1)	IL-1a	SYBR	Unknown	27.347	82.8	Auto Tm	35.4029	36.0417	0.877804	27.3368	27.3238	0.0317739	Manual Ct		Manual	10	21	Manual	0.3839
275	3 (12-1)	IL-1a	SYBR	Unknown	27.2876	82.8	Auto Tm	37.0426	36.0417	0.877804	27.3368	27.3238	0.0317739	Manual Ct		Manual	10	21	Manual	0.3839
302	30 (28-3)	IL-1a	SYBR	Unknown	27.4104	82.8	Auto Tm	33.7335	35.9392	1.92057	27.2947	27.3285	0.0712414	Manual Ct		Manual	10	21	Manual	0.3839
326	30 (28-3)	IL-1a	SYBR	Unknown	27.2805	82.8	Auto Tm	37.2414	35.9392	1.92057	27.2947	27.3285	0.0712414	Manual Ct		Manual	10	21	Manual	0.3839
350	30 (28-3)	IL-1a	SYBR	Unknown	27.2947	82.8	Auto Tm	36.8426	35.9392	1.92057	27.2947	27.3285	0.0712414	Manual Ct		Manual	10	21	Manual	0.3839
303	31 (29-1)	IL-1a	SYBR	Unknown	26.1056	82.8	Auto Tm	91.1595	90.3588	2.10445	26.1056	26.1174	0.0307488	Manual Ct		Manual	10	21	Manual	0.3839
327	31 (29-1)	IL-1a	SYBR	Unknown	26.1523	82.8	Auto Tm	87.9716	90.3588	2.10445	26.1056	26.1174	0.0307488	Manual Ct		Manual	10	21	Manual	0.3839
351	31 (29-1)	IL-1a	SYBR	Unknown	26.0943	82.8	Auto Tm	91.9455	90.3588	2.10445	26.1056	26.1174	0.0307488	Manual Ct		Manual	10	21	Manual	0.3839
304	32 (29-2)	IL-1a	SYBR	Unknown	25.9072	82.7	Auto Tm	106.032	101.748	10.4212	25.9072	25.9661	0.138477	Manual Ct		Manual	10	21	Manual	0.3839
328	32 (29-2)	IL-1a	SYBR	Unknown	26.1243	82.7	Auto Tm	89.868	101.748	10.4212	25.9072	25.9661	0.138477	Manual Ct		Manual	10	21	Manual	0.3839
352	32 (29-2)	IL-1a	SYBR	Unknown	25.8668	82.7	Auto Tm	109.345	101.748	10.4212	25.9072	25.9661	0.138477	Manual Ct		Manual	10	21	Manual	0.3839
305	33 (30-1)	IL-1a	SYBR	Unknown	26.9541	82.7	Auto Tm	47.7553	46.6181	0.985407	27.0009	26.986	0.0275803	Manual Ct		Manual	10	21	Manual	0.3839
329	33 (30-1)	IL-1a	SYBR	Unknown	27.0009	82.7	Auto Tm	46.0829	46.6181	0.985407	27.0009	26.986	0.0275803	Manual Ct		Manual	10	21	Manual	0.3839
353	33 (30-1)	IL-1a	SYBR	Unknown	27.0028	82.7	Auto Tm	46.0161	46.6181	0.985407	27.0009	26.986	0.0275803	Manual Ct		Manual	10	21	Manual	0.3839
306	34 (30-2)	IL-1a	SYBR	Unknown	25.6186	82.7	Auto Tm	132.111	43.2088	1.18303	25.6092	25.6077	0.011647	Manual Ct		Manual	10	21	Manual	0.3839
330	34 (30-2)	IL-1a	SYBR	Unknown	25.5954	82.7	Auto Tm	134.462	43.2088	1.18303	25.6092	25.6077	0.011647	Manual Ct		Manual	10	21	Manual	0.3839
354	34 (30-2)	IL-1a	SYBR	Unknown	25.6092	82.7	Auto Tm	133.054	43.2088	1.18303	25.6092	25.6077	0.011647	Manual Ct		Manual	10	21	Manual	0.3839
307	35 (31-1)	IL-1a	SYBR	Unknown	25.6933	82.7	Auto Tm	124.8	121.858	10.1794	25.6933	25.7277	0.111746	Manual Ct		Manual	10	21	Manual	0.3839
331	35 (31-1)	IL-1a	SYBR	Unknown	25.8526	82.7	Auto Tm	110.531	121.858	10.1794	25.6933	25.7277	0.111746	Manual Ct		Manual	10	21	Manual	0.3839
355	35 (31-1)	IL-1a	SYBR	Unknown	25.6373	82.7	Auto Tm	130.242	121.858	10.1794	25.6933	25.7277	0.111746	Manual Ct		Manual	10	21	Manual	0.3839
308	36 (31-2)	IL-1a	SYBR	Unknown	25.4786	82.7	Auto Tm	146.979	157.118	10.6492	25.399	25.393	0.0887109	Manual Ct		Manual	10	21	Manual	0.3839
332	36 (31-2)	IL-1a	SYBR	Unknown	25.399	82.5	Auto Tm	156.162	157.118	10.6492	25.399	25.393	0.0887109	Manual Ct		Manual	10	21	Manual	0.3839
356	36 (31-2)	IL-1a	SYBR	Unknown	25.3015	82.5	Auto Tm	168.213	157.118	10.6492	25.399	25.393	0.0887109	Manual Ct		Manual	10	21	Manual	0.3839
309	37 (32-1)	IL-1a	SYBR	Unknown	27.3178	82.4	Auto Tm	36.1981	35.6614	2.84243	27.3178	27.3403	0.106007	Manual Ct		Manual	10	21	Manual	0.3839
333	37 (32-1)	IL-1a	SYBR	Unknown	27.2473	82.4	Auto Tm	38.1972	35.6614	2.84243	27.3178	27.3403	0.106007	Manual Ct		Manual	10	21	Manual	0.3839
357	37 (32-1)	IL-1a	SYBR	Unknown	27.4557	82.4	Auto Tm	32.5888	35.6614	2.84243	27.3178	27.3403	0.106007	Manual Ct		Manual	10	21	Manual	0.3839
310	38 (A)	IL-1a	SYBR	Unknown	28.784	82.4	Auto Tm	11.8457	11.9035	0.849233	28.784	28.7798	0.0934791	Manual Ct		Manual	10	21	Manual	0.3839
334	38 (A)	IL-1a	SYBR	Unknown	28.8712	82.4	Auto Tm	11.0846	11.9035	0.849233	28.784	28.7798	0.0934791	Manual Ct		Manual	10	21	Manual	0.3839
358	38 (A)	IL-1a	SYBR	Unknown	28.6843	82.4	Auto Tm	12.7802	11.9035	0.849233	28.784	28.7798	0.0934791	Manual Ct		Manual	10	21	Manual	0.3839
311	39 (G)	IL-1a	SYBR	Unknown	27.8967	82.4	Auto Tm	23.2894	22.9064	0.584946	27.9019	27.9187	0.0337652	Manual Ct		Manual	10	21	Manual	0.3839
335	39 (G)	IL-1a	SYBR	Unknown	27.9019	82.4	Auto Tm	23.1966	22.9064	0.584946	27.9019	27.9187	0.0337652	Manual Ct		Manual	10	21	Manual	0.3839
359	39 (G)	IL-1a	SYBR	Unknown	27.9576	82.1	Auto Tm	22.2331	22.9064	0.584946	27.9019	27.9187	0.0337652	Manual Ct		Manual	10	21	Manual	0.3839
228	4 (12-2)	IL-1a	SYBR	Unknown	26.1124	83	Auto Tm	90.6882	94.1216	2.99637	26.0449	26.064	0.0421576	Manual Ct		Manual	10	21	Manual	0.3839
252	4 (12-2)	IL-1a	SYBR	Unknown	26.0348	82.8	Auto Tm	96.2086	94.1216	2.99637	26.0449	26.064	0.0421576	Manual Ct		Manual	10	21	Manual	0.3839
276	4 (12-2)	IL-1a	SYBR	Unknown	26.0449	82.8	Auto Tm	95.4679	94.1216	2.99637	26.0449	26.064	0.0421576	Manual Ct		Manual	10	21	Manual	0.3839
312	40 (H)	IL-1a	SYBR	Unknown	27.2463	82.4	Auto Tm	38.225	37.7545	1.31699	27.2463	27.2631	0.0461786	Manual Ct		Manual	10	21	Manual	0.3839
336	40 (H)	IL-1a	SYBR	Unknown	27.2277	82.4	Auto Tm	38.7717	37.7545	1.31699	27.2463	27.2631	0.0461786	Manual Ct		Manual	10	21	Manual	0.3839
360	40 (H)	IL-1a	SYBR	Unknown	27.3153	82.1	Auto Tm	36.2669	37.7545	1.31699	27.2463	27.2631	0.0461786	Manual Ct		Manual	10	21	Manual	0.3839
229	5 (13-1)	IL-1a	SYBR	Unknown	28.2193	83	Auto Tm	18.2135	17.787	0.91	28.2193	28.2516	0.0681548	Manual Ct		Manual	10	21	Manual	0.3839
253	5 (13-1)	IL-1a	SYBR	Unknown	28.2056	83	Auto Tm	18.4055	17.787	0.91	28.2193	28.2516	0.0681548	Manual Ct		Manual	10	21	Manual	0.3839
277	5 (13-1)	IL-1a	SYBR	Unknown	28.3299	82.8	Auto Tm	16.7421	17.787	0.91	28.2193	28.2516	0.0681548	Manual Ct		Manual	10	21	Manual	0.3839
230	6 (14-1)	IL-1a	SYBR	Unknown	27.3175	82.8	Auto Tm	36.2077	41.067	7.36734	27.2732	27.1655	0.225944	Manual Ct		Manual	10	21	Manual	0.3839
254	6 (14-1)	IL-1a	SYBR	Unknown	27.2732	82.8	Auto Tm	37.4495	41.067	7.36734	27.2732	27.1655	0.225944	Manual Ct		Manual	10	21	Manual	0.3839
278	6 (14-1)	IL-1a	SYBR	Unknown	26.9059	82.8	Auto Tm	49.5438	41.067	7.36734	27.2732	27.1655	0.225944	Manual Ct		Manual	10	21	Manual	0.3839
231	7 (15-1)	IL-1a	SYBR	Unknown	26.4882	82.8	Auto Tm	68.1075	70.8192	5.47185	26.4882	26.4395	0.0994104	Manual Ct		Manual	10	21	Manual	0.3839
255	7 (15-1)	IL-1a	SYBR	Unknown	26.5052	82.8	Auto Tm	67.2327	70.8192	5.47185	26.4882	26.4395	0.0994104	Manual Ct		Manual	10	21	Manual	0.3839
279	7 (15-1)	IL-1a	SYBR	Unknown	26.3251	82.8	Auto Tm	77.1173	70.8192	5.47185	26.4882	26.4395	0.0994104	Manual Ct		Manual	10	21	Manual	0.3839
232	8 (15-2)	IL-1a	SYBR	Unknown	26.8235	82.7	Auto Tm	52.7525	46.3851	5.66221	27.0472	26.9987	0.156648	Manual Ct		Manual	10	21	Manual	0.3839
256	8 (15-2)	IL-1a	SYBR	Unknown	27.1253	82.7	Auto Tm	41.9158	46.3851	5.66221	27.0472	26.9987	0.156648	Manual Ct		Manual	10	21	Manual	0.3839
280	8 (15-2)	IL-1a	SYBR	Unknown	27.0472	82.7	Auto Tm	44.4869	46.3851	5.66221	27.0472	26.9987	0.156648	Manual Ct		Manual	10	21	Manual	0.3839
233	9 (16-1)	IL-1a	SYBR	Unknown	28.729	82.7	Auto Tm	12.3527	15.1652	3.32629	28.5363	28.4802	0.28114	Manual Ct		Manual	10	21	Manual	0.3839
257	9 (16-1)	IL-1a	SYBR	Unknown	28.5363	82.7	Auto Tm	14.306	15.1652	3.32629	28.5363	28.4802	0.28114	Manual Ct		Manual	10	21	Manual	0.3839
281	9 (16-1)	IL-1a	SYBR	Unknown	28.1752	82.7	Auto Tm	18.8367	15.1652	3.32629	28.5363	28.4802	0.28114	Manual Ct		Manual	10	21	Manual	0.3839
378	Gene 3 Standard (1)	IL-1a	SYBR	Standard	32.2193	81.9	Auto Tm	1						Manual Ct		Manual	10	21	Manual	0.3839
375	Gene 3 Standard (10)	IL-1a	SYBR	Standard	28.9912	82.5	Auto Tm	10						Manual Ct		Manual	10	21	Manual	0.3839
376	Gene 3 Standard (10)	IL-1a	SYBR	Standard	28.6399	82.5	Auto Tm	10						Manual Ct		Manual	10	21	Manual	0.3839
373	Gene 3 Standard (100)	IL-1a	SYBR	Standard	26.0668	83.6	Auto Tm	100						Manual Ct		Manual	10	21	Manual	0.3839
374	Gene 3 Standard (100)	IL-1a	SYBR	Standard	26.0921	83.6	Auto Tm	100						Manual Ct		Manual	10	21	Manual	0.3839
381	NTC Gene 3	IL-1a	SYBR	NTC	32.5331	75	Auto Tm	0.680847						Manual Ct		Manual	10	21	Manual	0.3839
384	RT Negative 3	IL-1a	SYBR	NTC	36.8363	73.7	Auto Tm	0.025658						Manual Ct		Manual	10	21	Manual	0.3839
Slope	-3.02225	cycles/log decade
Y-Intercept		32.0286
R^2		0.992649
		IL-1a	18S
	Mouse ID	Qty Mean	Qty Mean	Ratio	Normalized values	Mice groups										Mean	STDEV	SE
1	11-1 (4%+RC+HFHC)	68.0047	16.1897	4.20049	1.43029	18%- 4 WEEKS	0.55697	0.643709	0.464325							0.555002	0.089708	0.051793
2	11-2 (4%+RC+HFHC)	104.397	17.3774	6.00764	2.04563	4%- 4 WEEKS	1.75098	1.70824	2.01975	2.91136						2.09758	0.559764	0.279882	P = 0.006	**
3	12-1 (18%+RC+HFHC)	36.0417	29.3828	1.22662	0.417671
4	12-2 (18%+RC+HFHC)	94.1216	18.8159	5.00225	1.70329	18%+RC - 4 WEEKS	0.308974	0.849147	0.659451							0.605857	0.274046	0.15822
5	13-1 (4%+RC+RC)	17.787	31.6372	0.562219	0.191438	4%+RC - 4 WEEKS	0.663488	0.898202	0.930882							0.830858	0.145864	0.0842146	P = 0.278
6	14-1 (18%+RC+RC)	41.067	20.4911	2.00414	0.68242
7	15-1 (4%+RC+HFHC)	70.8192	15.311	4.62537	1.57496	18%+RC+RC	0.68242	0.716148	0.656822	0.276684	0.223593	0.2312	0.420651			0.458217	0.222557	0.0841186
8	15-2 (4%+RC+HFHC)	46.3851	19.3291	2.39976	0.817129	18%+RC+HFHC		1.70329	1.2843	2	0.75231					1.43497	0.541597	0.242209	P = 0.006	**
9	16-1 (4%+RC+RC)	15.1652	19.7214	0.768969	0.261838
10	17-1 (18%+RC+HFHC)	81.9657	21.7315	3.77174	1.2843	4%+RC+RC	0.191438	0.261838	1.42908	0.529984	0.369564	1.1356				0.652918	0.509259	0.207904
11	17-2 (18%+RC+HFHC)	213.592	20.1731	10.5879	3.60525	4%+RC+HFHC	1.43029	2.04563	1.57496	0.817129	1.85272	0.974408	1.21568	0.281778	0.554085	1.19408	0.590816	0.196939	P = 0.090
12	18-1 (18%+RC+RC)	38.8292	18.462	2.1032	0.716148
13	19-1 (4%+RC+HFHC)	94.7969	17.4224	5.4411	1.85272											Mean		SE
14	20-1 (4%+RC+RC)	72.0724	17.1726	4.19695	1.42908											0.555002	1	0.051793	0.0933204
15	21-1 (4%+RC+HFHC)	58.7876	20.5432	2.86166	0.974408											2.09758	3.77942	0.279882	0.504291
16	21-2 (4%+RC+HFHC)	75.3015	21.0915	3.57022	1.21568
17	22-1 (4%+RC+RC)	32.0967	20.6215	1.55647	0.529984											0.605857	1.09163	0.15822	0.285081
18	23-1 (4%+RC+HFHC)	22.3948	27.0621	0.827531	0.281778											0.830858	1.49704	0.0842146	0.151738
19	23-2 (4%+RC+HFHC)	43.6586	26.8298	1.62724	0.554085
20	24-1 (4%+RC+RC)	17.9436	16.5327	1.08534	0.369564											0.458217	0.825614	0.0841186	0.151565
21	24-2 (4%+RC+RC)	66.6241	19.9769	3.33505	1.1356											1.43497	2.58553	0.242209	0.436412
22	25-2 (18%+RC+HFHC)	47.2015	21.364	2.2094	0.75231
23	26-1 (18%+RC+RC)	35.661	18.4871	1.92896	0.656822											0.652918	1.17643	0.207904	0.374601
24	26-2 (18%+RC+RC)	19.3508	23.8143	0.812571	0.276684											1.19408	2.15148	0.196939	0.354844
25	27-1 (4%+RC - 5 WEEKS)	43.3653	22.2552	1.94854	0.663488
26	27-2 (4%+RC - 5 WEEKS)	59.4484	22.5366	2.63786	0.898202
27	27-3 (4%+RC - 5 WEEKS)	62.3136	22.7935	2.73383	0.930882
28	28-1 (18%+RC - 4 WEEKS)	21.3123	23.4873	0.907399	0.308974
29	28-2 (18%+RC - 4 WEEKS)	51.3314	20.5837	2.49379	0.849147
30	28-3 (18%+RC - 4 WEEKS)	35.9392	18.557	1.93669	0.659451
31	29-1 (4%- 4 WEEKS)	90.3588	17.5716	5.14231	1.75098		0.55697	1.75098		0.308974	0.663488		0.68242	=F138		0.191438	1.43029
32	29-2 (4%- 4 WEEKS)	101.748	20.2815	5.0168	1.70824		0.643709	1.70824		0.849147	0.898202		0.716148	1.70329		0.261838	2.04563
33	30-1 (18%- 4 WEEKS)	46.6181	28.5	1.63572	0.55697		0.464325	2.01975		0.659451	0.930882		0.656822	1.2843		1.42908	1.57496
34	30-2 (18%- 4 WEEKS)	43.2088	22.8563	1.89046	0.643709			2.91136					0.276684	3.60525		0.529984	0.817129
35	31-1 (4%- 4 WEEKS)	121.858	20.5437	5.93164	2.01975								0.223593	0.75231		0.369564	1.85272
36	31-2 (4%- 4 WEEKS)	157.118	18.3761	8.55013	2.91136								0.2312			1.1356	0.974408
37	32-1 (18%- 4 WEEKS)	35.6614	26.1516	1.36364	0.464325								0.420651				1.21568
38	A (18%+RC+RC)	11.9035	18.1276	0.656652	0.223593												0.281778
39	G (18%+RC+RC)	22.9064	33.7358	0.678992	0.2312												0.554085
40	H (18%+RC+RC)	37.7545	30.5612	1.23538	0.420651
				2.93682
