# Supplementary material for: Long-term metabolic effects of malnutrition: Liver steatosis and insulin resistance following early-life protein restriction
Source: PLoS One. 2018 Jul 2;13(7):e0199916. doi: 10.1371/journal.pone.0199916 (PMC6028108; doi:10.1371/journal.pone.0199916)
Supplement: S11 Data — (XLS) [file pone.0199916.s011.xls]

## Sheet: Plate 4 IL1beta_MCP1_NLRP3_anal
SDS 2.4	AQ Results	1
Filename	Plate 4 IL1beta_MCP1_NLRP3
PlateID
Assay Type	Absolute Quantification
Run DateTime	2015-12-21 13:48:32
Operator
ThermalCycleParams
Sample Information
Well	Sample Name	Detector Name	Reporter	Task	Ct	Tm Value	Tm Type	Quantity	Qty Mean	Qty StdDev	Ct Median	Ct Mean	Ct StdDev	Ct Type	Template Name	Baseline Type	Baseline Start	Baseline Stop	Threshold Type	Threshold	FOS	HMD	LME	EW	BPR	NAW	HNS	HRN	EAF	BAF	TAF	CAF
1	1 (11-1)	IL-1B	SYBR	Unknown	27.9019	79.8	Auto Tm	43.7813	52.6215	7.7383	27.625	27.7024	0.174226	Manual Ct		Manual	15	19	Manual	0.30304
25	1 (11-1)	IL-1B	SYBR	Unknown	27.625	79.8	Auto Tm	55.9149	52.6215	7.7383	27.625	27.7024	0.174226	Manual Ct		Manual	15	19	Manual	0.30304
49	1 (11-1)	IL-1B	SYBR	Unknown	27.5803	80.1	Auto Tm	58.1683	52.6215	7.7383	27.625	27.7024	0.174226	Manual Ct		Manual	15	19	Manual	0.30304
10	10 (17-1)	IL-1B	SYBR	Unknown	26.0464	80.6	Auto Tm	225.511	249.012	28.6056	25.9728	25.939	0.127628	Manual Ct		Manual	15	19	Manual	0.30304
34	10 (17-1)	IL-1B	SYBR	Unknown	25.9728	80.6	Auto Tm	240.661	249.012	28.6056	25.9728	25.939	0.127628	Manual Ct		Manual	15	19	Manual	0.30304
58	10 (17-1)	IL-1B	SYBR	Unknown	25.7979	80.6	Auto Tm	280.864	249.012	28.6056	25.9728	25.939	0.127628	Manual Ct		Manual	15	19	Manual	0.30304
11	11 (17-2)	IL-1B	SYBR	Unknown	25.4851	80.5	Auto Tm	370.267	358.943	13.6315	25.5083	25.5208	0.0433269	Manual Ct		Manual	15	19	Manual	0.30304
35	11 (17-2)	IL-1B	SYBR	Unknown	25.569	80.5	Auto Tm	343.813	358.943	13.6315	25.5083	25.5208	0.0433269	Manual Ct		Manual	15	19	Manual	0.30304
59	11 (17-2)	IL-1B	SYBR	Unknown	25.5083	80.8	Auto Tm	362.749	358.943	13.6315	25.5083	25.5208	0.0433269	Manual Ct		Manual	15	19	Manual	0.30304
12	12 (18-1)	IL-1B	SYBR	Unknown	28.0959	80.5	Auto Tm	36.8839	35.5133	2.75768	28.0959	28.1412	0.0900048	Manual Ct		Manual	15	19	Manual	0.30304
36	12 (18-1)	IL-1B	SYBR	Unknown	28.2448	80.5	Auto Tm	32.3389	35.5133	2.75768	28.0959	28.1412	0.0900048	Manual Ct		Manual	15	19	Manual	0.30304
60	12 (18-1)	IL-1B	SYBR	Unknown	28.0827	80.8	Auto Tm	37.3172	35.5133	2.75768	28.0959	28.1412	0.0900048	Manual Ct		Manual	15	19	Manual	0.30304
13	13 (19-1)	IL-1B	SYBR	Unknown	26.5407	80.5	Auto Tm	145.714	149.757	14.3202	26.5407	26.5131	0.106566	Manual Ct		Manual	15	19	Manual	0.30304
37	13 (19-1)	IL-1B	SYBR	Unknown	26.6032	80.8	Auto Tm	137.893	149.757	14.3202	26.5407	26.5131	0.106566	Manual Ct		Manual	15	19	Manual	0.30304
61	13 (19-1)	IL-1B	SYBR	Unknown	26.3955	80.8	Auto Tm	165.665	149.757	14.3202	26.5407	26.5131	0.106566	Manual Ct		Manual	15	19	Manual	0.30304
14	14 (20-1)	IL-1B	SYBR	Unknown	26.8763	80.5	Auto Tm	108.335	113.056	15.6414	26.8763	26.835	0.153157	Manual Ct		Manual	15	19	Manual	0.30304
38	14 (20-1)	IL-1B	SYBR	Unknown	26.9633	80.5	Auto Tm	100.319	113.056	15.6414	26.8763	26.835	0.153157	Manual Ct		Manual	15	19	Manual	0.30304
62	14 (20-1)	IL-1B	SYBR	Unknown	26.6654	80.8	Auto Tm	130.515	113.056	15.6414	26.8763	26.835	0.153157	Manual Ct		Manual	15	19	Manual	0.30304
15	15 (21-1)	IL-1B	SYBR	Unknown	26.5908	80.5	Auto Tm	139.412	139.29	0.166198	26.5912	26.5918	0.00135102	Manual Ct		Manual	15	19	Manual	0.30304
39	15 (21-1)	IL-1B	SYBR	Unknown	26.5912	80.5	Auto Tm	139.357	139.29	0.166198	26.5912	26.5918	0.00135102	Manual Ct		Manual	15	19	Manual	0.30304
63	15 (21-1)	IL-1B	SYBR	Unknown	26.5933	80.8	Auto Tm	139.101	139.29	0.166198	26.5912	26.5918	0.00135102	Manual Ct		Manual	15	19	Manual	0.30304
16	16 (21-2)	IL-1B	SYBR	Unknown	27.1984	80.5	Auto Tm	81.502	75.7233	9.11809	27.2131	27.2875	0.141699	Manual Ct		Manual	15	19	Manual	0.30304
40	16 (21-2)	IL-1B	SYBR	Unknown	27.4509	80.5	Auto Tm	65.212	75.7233	9.11809	27.2131	27.2875	0.141699	Manual Ct		Manual	15	19	Manual	0.30304
64	16 (21-2)	IL-1B	SYBR	Unknown	27.2131	80.5	Auto Tm	80.4559	75.7233	9.11809	27.2131	27.2875	0.141699	Manual Ct		Manual	15	19	Manual	0.30304
17	17 (22-1)	IL-1B	SYBR	Unknown	28.7296	80.5	Auto Tm	21.0733	20.3651	1.00148	28.769	28.769	0.0556891	Manual Ct		Manual	15	19	Manual	0.30304
41	17 (22-1)	IL-1B	SYBR	Unknown	28.8084	80.5	Auto Tm	19.657	20.3651	1.00148	28.769	28.769	0.0556891	Manual Ct		Manual	15	19	Manual	0.30304
41	17 (22-1)	IL-1B	SYBR	Unknown	28.8084	80.5	Auto Tm	19.657	20.3651	1.00148	28.769	28.769	0.0556891	Manual Ct		Manual	15	19	Manual	0.30304
18	18 (23-1)	IL-1B	SYBR	Unknown	28.0869	80.5	Auto Tm	37.1799	38.6859	1.92883	28.0617	28.0429	0.0558437	Manual Ct		Manual	15	19	Manual	0.30304
42	18 (23-1)	IL-1B	SYBR	Unknown	27.9801	80.5	Auto Tm	40.86	38.6859	1.92883	28.0617	28.0429	0.0558437	Manual Ct		Manual	15	19	Manual	0.30304
66	18 (23-1)	IL-1B	SYBR	Unknown	28.0617	80.5	Auto Tm	38.018	38.6859	1.92883	28.0617	28.0429	0.0558437	Manual Ct		Manual	15	19	Manual	0.30304
19	19 (23-2)	IL-1B	SYBR	Unknown	26.7568	80.5	Auto Tm	120.391	118.139	2.36027	26.7763	26.7784	0.0226482	Manual Ct		Manual	15	19	Manual	0.30304
43	19 (23-2)	IL-1B	SYBR	Unknown	26.7763	80.5	Auto Tm	118.344	118.139	2.36027	26.7763	26.7784	0.0226482	Manual Ct		Manual	15	19	Manual	0.30304
67	19 (23-2)	IL-1B	SYBR	Unknown	26.802	80.5	Auto Tm	115.684	118.139	2.36027	26.7763	26.7784	0.0226482	Manual Ct		Manual	15	19	Manual	0.30304
2	2 (11-2)	IL-1B	SYBR	Unknown	26.7181	80.1	Auto Tm	124.582	114.252	23.712	26.7181	26.834	0.251871	Manual Ct		Manual	15	19	Manual	0.30304
26	2 (11-2)	IL-1B	SYBR	Unknown	27.1229	80.1	Auto Tm	87.1269	114.252	23.712	26.7181	26.834	0.251871	Manual Ct		Manual	15	19	Manual	0.30304
50	2 (11-2)	IL-1B	SYBR	Unknown	26.6608	80.1	Auto Tm	131.046	114.252	23.712	26.7181	26.834	0.251871	Manual Ct		Manual	15	19	Manual	0.30304
44	20 (24-1)	IL-1B	SYBR	Unknown	28.6606	80.4	Auto Tm	22.3972	20.4217	2.79387	28.7705	28.7705	0.155351	Manual Ct		Manual	15	19	Manual	0.30304
68	20 (24-1)	IL-1B	SYBR	Unknown	28.8803	80.4	Auto Tm	18.4461	20.4217	2.79387	28.7705	28.7705	0.155351	Manual Ct		Manual	15	19	Manual	0.30304
68	20 (24-1)	IL-1B	SYBR	Unknown	28.8803	80.4	Auto Tm	18.4461	20.4217	2.79387	28.7705	28.7705	0.155351	Manual Ct		Manual	15	19	Manual	0.30304
21	21 (24-2)	IL-1B	SYBR	Unknown	27.0854	80.2	Auto Tm	90.0602	103.691	14.7619	26.9485	26.9335	0.159998	Manual Ct		Manual	15	19	Manual	0.30304
45	21 (24-2)	IL-1B	SYBR	Unknown	26.7665	80.4	Auto Tm	119.37	103.691	14.7619	26.9485	26.9335	0.159998	Manual Ct		Manual	15	19	Manual	0.30304
69	21 (24-2)	IL-1B	SYBR	Unknown	26.9485	80.4	Auto Tm	101.643	103.691	14.7619	26.9485	26.9335	0.159998	Manual Ct		Manual	15	19	Manual	0.30304
22	22 (25-2)	IL-1B	SYBR	Unknown	27.7508	80.2	Auto Tm	50.0305	50.541	4.00136	27.7508	27.7417	0.0891575	Manual Ct		Manual	15	19	Manual	0.30304
46	22 (25-2)	IL-1B	SYBR	Unknown	27.8259	80.2	Auto Tm	46.8194	50.541	4.00136	27.7508	27.7417	0.0891575	Manual Ct		Manual	15	19	Manual	0.30304
70	22 (25-2)	IL-1B	SYBR	Unknown	27.6483	80.4	Auto Tm	54.7731	50.541	4.00136	27.7508	27.7417	0.0891575	Manual Ct		Manual	15	19	Manual	0.30304
23	23 (26-1)	IL-1B	SYBR	Unknown	27.8803	80.2	Auto Tm	44.6233	39.8865	5.45376	27.9731	28.0147	0.159277	Manual Ct		Manual	15	19	Manual	0.30304
47	23 (26-1)	IL-1B	SYBR	Unknown	28.1906	80.2	Auto Tm	33.9243	39.8865	5.45376	27.9731	28.0147	0.159277	Manual Ct		Manual	15	19	Manual	0.30304
71	23 (26-1)	IL-1B	SYBR	Unknown	27.9731	80.2	Auto Tm	41.112	39.8865	5.45376	27.9731	28.0147	0.159277	Manual Ct		Manual	15	19	Manual	0.30304
24	24 (26-2)	IL-1B	SYBR	Unknown	27.91	80.2	Auto Tm	43.4689	50.8706	8.67812	27.7809	27.7427	0.189287	Manual Ct		Manual	15	19	Manual	0.30304
48	24 (26-2)	IL-1B	SYBR	Unknown	27.7809	80.2	Auto Tm	48.7215	50.8706	8.67812	27.7809	27.7427	0.189287	Manual Ct		Manual	15	19	Manual	0.30304
72	24 (26-2)	IL-1B	SYBR	Unknown	27.5372	80.2	Auto Tm	60.4213	50.8706	8.67812	27.7809	27.7427	0.189287	Manual Ct		Manual	15	19	Manual	0.30304
73	25 (27-1)	IL-1B	SYBR	Unknown	28.7731	80.1	Auto Tm	20.2791	20.5232	0.975932	28.7731	28.7604	0.0534217	Manual Ct		Manual	15	19	Manual	0.30304
97	25 (27-1)	IL-1B	SYBR	Unknown	28.7018	80.1	Auto Tm	21.598	20.5232	0.975932	28.7731	28.7604	0.0534217	Manual Ct		Manual	15	19	Manual	0.30304
121	25 (27-1)	IL-1B	SYBR	Unknown	28.8063	80.4	Auto Tm	19.6925	20.5232	0.975932	28.7731	28.7604	0.0534217	Manual Ct		Manual	15	19	Manual	0.30304
74	26 (27-2)	IL-1B	SYBR	Unknown	28.1735	80.3	Auto Tm	34.4424	34.1042	5.40148	28.1735	28.1943	0.182348	Manual Ct		Manual	15	19	Manual	0.30304
98	26 (27-2)	IL-1B	SYBR	Unknown	28.3862	80.3	Auto Tm	28.5416	34.1042	5.40148	28.1735	28.1943	0.182348	Manual Ct		Manual	15	19	Manual	0.30304
122	26 (27-2)	IL-1B	SYBR	Unknown	28.0233	80.3	Auto Tm	39.3287	34.1042	5.40148	28.1735	28.1943	0.182348	Manual Ct		Manual	15	19	Manual	0.30304
75	27 (27-3)	IL-1B	SYBR	Unknown	28.5598	80.3	Auto Tm	24.4844	24.8627	3.64122	28.5598	28.5505	0.165218	Manual Ct		Manual	15	19	Manual	0.30304
99	27 (27-3)	IL-1B	SYBR	Unknown	28.7108	80.3	Auto Tm	21.4255	24.8627	3.64122	28.5598	28.5505	0.165218	Manual Ct		Manual	15	19	Manual	0.30304
123	27 (27-3)	IL-1B	SYBR	Unknown	28.3808	80.3	Auto Tm	28.6784	24.8627	3.64122	28.5598	28.5505	0.165218	Manual Ct		Manual	15	19	Manual	0.30304
76	28 (28-1)	IL-1B	SYBR	Unknown	28.9277	80.3	Auto Tm	17.6905	16.8859	2.62624	28.9277	28.99	0.183401	Manual Ct		Manual	15	19	Manual	0.30304
100	28 (28-1)	IL-1B	SYBR	Unknown	29.1964	80.3	Auto Tm	13.9515	16.8859	2.62624	28.9277	28.99	0.183401	Manual Ct		Manual	15	19	Manual	0.30304
124	28 (28-1)	IL-1B	SYBR	Unknown	28.8459	80.3	Auto Tm	19.0158	16.8859	2.62624	28.9277	28.99	0.183401	Manual Ct		Manual	15	19	Manual	0.30304
77	29 (28-2)	IL-1B	SYBR	Unknown	28.5682	80.3	Auto Tm	24.3022	26.7224	2.6536	28.4786	28.4644	0.111525	Manual Ct		Manual	15	19	Manual	0.30304
101	29 (28-2)	IL-1B	SYBR	Unknown	28.3465	80.6	Auto Tm	29.5599	26.7224	2.6536	28.4786	28.4644	0.111525	Manual Ct		Manual	15	19	Manual	0.30304
125	29 (28-2)	IL-1B	SYBR	Unknown	28.4786	80.6	Auto Tm	26.305	26.7224	2.6536	28.4786	28.4644	0.111525	Manual Ct		Manual	15	19	Manual	0.30304
3	3 (12-1)	IL-1B	SYBR	Unknown	28.9215	80.1	Auto Tm	17.7864	18.2021	2.18441	28.9215	28.9007	0.134301	Manual Ct		Manual	15	19	Manual	0.30304
27	3 (12-1)	IL-1B	SYBR	Unknown	28.7573	80.1	Auto Tm	20.5645	18.2021	2.18441	28.9215	28.9007	0.134301	Manual Ct		Manual	15	19	Manual	0.30304
51	3 (12-1)	IL-1B	SYBR	Unknown	29.0234	80.3	Auto Tm	16.2554	18.2021	2.18441	28.9215	28.9007	0.134301	Manual Ct		Manual	15	19	Manual	0.30304
78	30 (28-3)	IL-1B	SYBR	Unknown	28.7	80.3	Auto Tm	21.6323	16.8929	4.38143	29.0374	29.0049	0.290027	Manual Ct		Manual	15	19	Manual	0.30304
102	30 (28-3)	IL-1B	SYBR	Unknown	29.0374	80.6	Auto Tm	16.0563	16.8929	4.38143	29.0374	29.0049	0.290027	Manual Ct		Manual	15	19	Manual	0.30304
126	30 (28-3)	IL-1B	SYBR	Unknown	29.2773	80.6	Auto Tm	12.9901	16.8929	4.38143	29.0374	29.0049	0.290027	Manual Ct		Manual	15	19	Manual	0.30304
79	31 (29-1)	IL-1B	SYBR	Unknown	26.3665	80.6	Auto Tm	169.964	160.145	8.66068	26.4572	26.4349	0.0604748	Manual Ct		Manual	15	19	Manual	0.30304
103	31 (29-1)	IL-1B	SYBR	Unknown	26.4572	80.6	Auto Tm	156.879	160.145	8.66068	26.4572	26.4349	0.0604748	Manual Ct		Manual	15	19	Manual	0.30304
127	31 (29-1)	IL-1B	SYBR	Unknown	26.4811	80.6	Auto Tm	153.592	160.145	8.66068	26.4572	26.4349	0.0604748	Manual Ct		Manual	15	19	Manual	0.30304
80	32 (29-2)	IL-1B	SYBR	Unknown	27.8367	80.6	Auto Tm	46.375	50.8452	4.06141	27.7104	27.735	0.0918961	Manual Ct		Manual	15	19	Manual	0.30304
104	32 (29-2)	IL-1B	SYBR	Unknown	27.7104	80.6	Auto Tm	51.8521	50.8452	4.06141	27.7104	27.735	0.0918961	Manual Ct		Manual	15	19	Manual	0.30304
128	32 (29-2)	IL-1B	SYBR	Unknown	27.658	80.6	Auto Tm	54.3084	50.8452	4.06141	27.7104	27.735	0.0918961	Manual Ct		Manual	15	19	Manual	0.30304
81	33 (30-1)	IL-1B	SYBR	Unknown	28.8393	80.6	Auto Tm	19.1263	19.5286	0.414566	28.8171	28.8159	0.0240129	Manual Ct		Manual	15	19	Manual	0.30304
105	33 (30-1)	IL-1B	SYBR	Unknown	28.7914	80.6	Auto Tm	19.9544	19.5286	0.414566	28.8171	28.8159	0.0240129	Manual Ct		Manual	15	19	Manual	0.30304
129	33 (30-1)	IL-1B	SYBR	Unknown	28.8171	80.8	Auto Tm	19.505	19.5286	0.414566	28.8171	28.8159	0.0240129	Manual Ct		Manual	15	19	Manual	0.30304
82	34 (30-2)	IL-1B	SYBR	Unknown	26.6052	80.6	Auto Tm	137.65	150.544	11.2474	26.4661	26.506	0.0864472	Manual Ct		Manual	15	19	Manual	0.30304
106	34 (30-2)	IL-1B	SYBR	Unknown	26.4467	80.8	Auto Tm	158.34	150.544	11.2474	26.4661	26.506	0.0864472	Manual Ct		Manual	15	19	Manual	0.30304
130	34 (30-2)	IL-1B	SYBR	Unknown	26.4661	80.8	Auto Tm	155.641	150.544	11.2474	26.4661	26.506	0.0864472	Manual Ct		Manual	15	19	Manual	0.30304
83	35 (31-1)	IL-1B	SYBR	Unknown	26.6771	80.5	Auto Tm	129.18	137.935	11.368	26.637	26.6054	0.0916968	Manual Ct		Manual	15	19	Manual	0.30304
107	35 (31-1)	IL-1B	SYBR	Unknown	26.637	80.8	Auto Tm	133.841	137.935	11.368	26.637	26.6054	0.0916968	Manual Ct		Manual	15	19	Manual	0.30304
131	35 (31-1)	IL-1B	SYBR	Unknown	26.502	80.8	Auto Tm	150.783	137.935	11.368	26.637	26.6054	0.0916968	Manual Ct		Manual	15	19	Manual	0.30304
84	36 (31-2)	IL-1B	SYBR	Unknown	26.5107	80.8	Auto Tm	149.638	177.32	39.9565	26.4406	26.3366	0.243411	Manual Ct		Manual	15	19	Manual	0.30304
108	36 (31-2)	IL-1B	SYBR	Unknown	26.4406	80.8	Auto Tm	159.195	177.32	39.9565	26.4406	26.3366	0.243411	Manual Ct		Manual	15	19	Manual	0.30304
132	36 (31-2)	IL-1B	SYBR	Unknown	26.0584	80.8	Auto Tm	223.126	177.32	39.9565	26.4406	26.3366	0.243411	Manual Ct		Manual	15	19	Manual	0.30304
85	37 (32-1)	IL-1B	SYBR	Unknown	28.8056	80.8	Auto Tm	19.7047	18.3347	1.44689	28.8784	28.8896	0.0900593	Manual Ct		Manual	15	19	Manual	0.30304
109	37 (32-1)	IL-1B	SYBR	Unknown	28.9847	80.8	Auto Tm	16.8216	18.3347	1.44689	28.8784	28.8896	0.0900593	Manual Ct		Manual	15	19	Manual	0.30304
133	37 (32-1)	IL-1B	SYBR	Unknown	28.8784	80.8	Auto Tm	18.4778	18.3347	1.44689	28.8784	28.8896	0.0900593	Manual Ct		Manual	15	19	Manual	0.30304
86	38 (A)	IL-1B	SYBR	Unknown	29.6174	80.8	Auto Tm	9.61852	9.39532	0.311155	29.6282	29.6444	0.0378276	Manual Ct		Manual	15	19	Manual	0.30304
110	38 (A)	IL-1B	SYBR	Unknown	29.6877	80.8	Auto Tm	9.03989	9.39532	0.311155	29.6282	29.6444	0.0378276	Manual Ct		Manual	15	19	Manual	0.30304
134	38 (A)	IL-1B	SYBR	Unknown	29.6282	80.8	Auto Tm	9.52754	9.39532	0.311155	29.6282	29.6444	0.0378276	Manual Ct		Manual	15	19	Manual	0.30304
87	39 (G)	IL-1B	SYBR	Unknown	29.1225	80.8	Auto Tm	14.8928	12.5539	2.23772	29.3358	29.3279	0.201535	Manual Ct		Manual	15	19	Manual	0.30304
111	39 (G)	IL-1B	SYBR	Unknown	29.3358	80.8	Auto Tm	12.3355	12.5539	2.23772	29.3358	29.3279	0.201535	Manual Ct		Manual	15	19	Manual	0.30304
135	39 (G)	IL-1B	SYBR	Unknown	29.5254	80.8	Auto Tm	10.4334	12.5539	2.23772	29.3358	29.3279	0.201535	Manual Ct		Manual	15	19	Manual	0.30304
4	4 (12-2)	IL-1B	SYBR	Unknown	25.9961	80.1	Auto Tm	235.748	240.305	12.3842	25.9961	25.9754	0.0576716	Manual Ct		Manual	15	19	Manual	0.30304
28	4 (12-2)	IL-1B	SYBR	Unknown	25.9103	80.3	Auto Tm	254.322	240.305	12.3842	25.9961	25.9754	0.0576716	Manual Ct		Manual	15	19	Manual	0.30304
52	4 (12-2)	IL-1B	SYBR	Unknown	26.0199	80.3	Auto Tm	230.845	240.305	12.3842	25.9961	25.9754	0.0576716	Manual Ct		Manual	15	19	Manual	0.30304
88	40 (H)	IL-1B	SYBR	Unknown	27.4826	80.5	Auto Tm	63.4098	67.4788	3.53054	27.3821	27.4132	0.0601619	Manual Ct		Manual	15	19	Manual	0.30304
112	40 (H)	IL-1B	SYBR	Unknown	27.3821	80.8	Auto Tm	69.2953	67.4788	3.53054	27.3821	27.4132	0.0601619	Manual Ct		Manual	15	19	Manual	0.30304
136	40 (H)	IL-1B	SYBR	Unknown	27.375	80.8	Auto Tm	69.7312	67.4788	3.53054	27.3821	27.4132	0.0601619	Manual Ct		Manual	15	19	Manual	0.30304
5	5 (13-1)	IL-1B	SYBR	Unknown	29.6289	80.3	Auto Tm	9.52162	9.99423	0.668363	29.5753	29.5753	0.0757578	Manual Ct		Manual	15	19	Manual	0.30304
53	5 (13-1)	IL-1B	SYBR	Unknown	29.5218	80.3	Auto Tm	10.4668	9.99423	0.668363	29.5753	29.5753	0.0757578	Manual Ct		Manual	15	19	Manual	0.30304
53	5 (13-1)	IL-1B	SYBR	Unknown	29.5218	80.3	Auto Tm	10.4668	9.99423	0.668363	29.5753	29.5753	0.0757578	Manual Ct		Manual	15	19	Manual	0.30304
6	6 (14-1)	IL-1B	SYBR	Unknown	28.4271	80.3	Auto Tm	27.5281	30.4782	2.65147	28.2838	28.3148	0.100455	Manual Ct		Manual	15	19	Manual	0.30304
30	6 (14-1)	IL-1B	SYBR	Unknown	28.2838	80.3	Auto Tm	31.2441	30.4782	2.65147	28.2838	28.3148	0.100455	Manual Ct		Manual	15	19	Manual	0.30304
54	6 (14-1)	IL-1B	SYBR	Unknown	28.2335	80.3	Auto Tm	32.6625	30.4782	2.65147	28.2838	28.3148	0.100455	Manual Ct		Manual	15	19	Manual	0.30304
7	7 (15-1)	IL-1B	SYBR	Unknown	25.582	80.6	Auto Tm	339.871	336.357	3.04305	25.5997	25.5938	0.0102149	Manual Ct		Manual	15	19	Manual	0.30304
31	7 (15-1)	IL-1B	SYBR	Unknown	25.5998	80.6	Auto Tm	334.591	336.357	3.04305	25.5997	25.5938	0.0102149	Manual Ct		Manual	15	19	Manual	0.30304
55	7 (15-1)	IL-1B	SYBR	Unknown	25.5997	80.6	Auto Tm	334.609	336.357	3.04305	25.5997	25.5938	0.0102149	Manual Ct		Manual	15	19	Manual	0.30304
8	8 (15-2)	IL-1B	SYBR	Unknown	27.3499	80.3	Auto Tm	71.2977	72.117	3.23879	27.3499	27.3377	0.0504684	Manual Ct		Manual	15	19	Manual	0.30304
32	8 (15-2)	IL-1B	SYBR	Unknown	27.2822	80.6	Auto Tm	75.6868	72.117	3.23879	27.3499	27.3377	0.0504684	Manual Ct		Manual	15	19	Manual	0.30304
56	8 (15-2)	IL-1B	SYBR	Unknown	27.3809	80.6	Auto Tm	69.3666	72.117	3.23879	27.3499	27.3377	0.0504684	Manual Ct		Manual	15	19	Manual	0.30304
9	9 (16-1)	IL-1B	SYBR	Unknown	29.5231	80.6	Auto Tm	10.4547	11.1078	1.67781	29.5231	29.4627	0.165829	Manual Ct		Manual	15	19	Manual	0.30304
33	9 (16-1)	IL-1B	SYBR	Unknown	29.59	80.6	Auto Tm	9.85472	11.1078	1.67781	29.5231	29.4627	0.165829	Manual Ct		Manual	15	19	Manual	0.30304
57	9 (16-1)	IL-1B	SYBR	Unknown	29.2752	80.6	Auto Tm	13.0139	11.1078	1.67781	29.5231	29.4627	0.165829	Manual Ct		Manual	15	19	Manual	0.30304
365	Gene 1 Standard (1)	IL-1B	SYBR	Standard	32.1461	79.8	Auto Tm	1						Manual Ct		Manual	15	19	Manual	0.30304
363	Gene 1 Standard (10)	IL-1B	SYBR	Standard	29.641	79.8	Auto Tm	10						Manual Ct		Manual	15	19	Manual	0.30304
361	Gene 1 Standard (100)	IL-1B	SYBR	Standard	26.9331	80.6	Auto Tm	100						Manual Ct		Manual	15	19	Manual	0.30304
379	NTC Gene 1	IL-1B	SYBR	NTC	34.0789	74.9	Auto Tm	0.186822						Manual Ct		Manual	15	19	Manual	0.30304
382	RT Negative 1	IL-1B	SYBR	NTC	Undetermined	61.8	Auto Tm	0						Manual Ct		Manual	15	19	Manual	0.30304						TRUE
Slope	-2.60649	cycles/log decade
Y-Intercept		32.1799
R^2		0.999496
Well	Sample Name	Detector Name	Reporter	Task	Ct	Tm Value	Tm Type	Quantity	Qty Mean	Qty StdDev	Ct Median	Ct Mean	Ct StdDev	Ct Type	Template Name	Baseline Type	Baseline Start	Baseline Stop	Threshold Type	Threshold	FOS	HMD	LME	EW	BPR	NAW	HNS	HRN	EAF	BAF	TAF	CAF
89	1 (11-1)	MCP-1	SYBR	Unknown	29.6522	85.8	Auto Tm	60.2619	56.8944	8.5861	29.6522	29.7472	0.228661	Manual Ct		Manual	15	21	Manual	0.29434
113	1 (11-1)	MCP-1	SYBR	Unknown	29.5813	85.8	Auto Tm	63.2862	56.8944	8.5861	29.6522	29.7472	0.228661	Manual Ct		Manual	15	21	Manual	0.29434
137	1 (11-1)	MCP-1	SYBR	Unknown	30.008	85.8	Auto Tm	47.135	56.8944	8.5861	29.6522	29.7472	0.228661	Manual Ct		Manual	15	21	Manual	0.29434
146	10 (17-1)	MCP-1	SYBR	Unknown	27.7737	85.7	Auto Tm	220.484	222.271	2.55216	27.7694	27.7621	0.0165784	Manual Ct		Manual	15	21	Manual	0.29434
170	10 (17-1)	MCP-1	SYBR	Unknown	27.7694	85.7	Auto Tm	221.136	222.271	2.55216	27.7694	27.7621	0.0165784	Manual Ct		Manual	15	21	Manual	0.29434
194	10 (17-1)	MCP-1	SYBR	Unknown	27.7431	85.7	Auto Tm	225.194	222.271	2.55216	27.7694	27.7621	0.0165784	Manual Ct		Manual	15	21	Manual	0.29434
147	11 (17-2)	MCP-1	SYBR	Unknown	25.4484	85.7	Auto Tm	1098.26	1037.97	60.9689	25.5283	25.5318	0.0852582	Manual Ct		Manual	15	21	Manual	0.29434
171	11 (17-2)	MCP-1	SYBR	Unknown	25.5283	85.7	Auto Tm	1039.31	1037.97	60.9689	25.5283	25.5318	0.0852582	Manual Ct		Manual	15	21	Manual	0.29434
195	11 (17-2)	MCP-1	SYBR	Unknown	25.6188	85.7	Auto Tm	976.344	1037.97	60.9689	25.5283	25.5318	0.0852582	Manual Ct		Manual	15	21	Manual	0.29434
148	12 (18-1)	MCP-1	SYBR	Unknown	30.1892	85.7	Auto Tm	41.5914	46.4808	4.50365	30.0002	30.0329	0.142797	Manual Ct		Manual	15	21	Manual	0.29434
172	12 (18-1)	MCP-1	SYBR	Unknown	29.9093	85.7	Auto Tm	50.4595	46.4808	4.50365	30.0002	30.0329	0.142797	Manual Ct		Manual	15	21	Manual	0.29434
196	12 (18-1)	MCP-1	SYBR	Unknown	30.0002	85.7	Auto Tm	47.3914	46.4808	4.50365	30.0002	30.0329	0.142797	Manual Ct		Manual	15	21	Manual	0.29434
149	13 (19-1)	MCP-1	SYBR	Unknown	28.3534	85.7	Auto Tm	147.757	144.835	8.18256	28.3534	28.3839	0.0829917	Manual Ct		Manual	15	21	Manual	0.29434
173	13 (19-1)	MCP-1	SYBR	Unknown	28.4778	85.7	Auto Tm	135.592	144.835	8.18256	28.3534	28.3839	0.0829917	Manual Ct		Manual	15	21	Manual	0.29434
197	13 (19-1)	MCP-1	SYBR	Unknown	28.3204	85.7	Auto Tm	151.155	144.835	8.18256	28.3534	28.3839	0.0829917	Manual Ct		Manual	15	21	Manual	0.29434
150	14 (20-1)	MCP-1	SYBR	Unknown	29.6227	85.7	Auto Tm	61.5036	52.0863	10.365	29.8172	29.8835	0.299538	Manual Ct		Manual	15	21	Manual	0.29434
174	14 (20-1)	MCP-1	SYBR	Unknown	30.2106	85.7	Auto Tm	40.9809	52.0863	10.365	29.8172	29.8835	0.299538	Manual Ct		Manual	15	21	Manual	0.29434
198	14 (20-1)	MCP-1	SYBR	Unknown	29.8172	85.7	Auto Tm	53.7744	52.0863	10.365	29.8172	29.8835	0.299538	Manual Ct		Manual	15	21	Manual	0.29434
151	15 (21-1)	MCP-1	SYBR	Unknown	29.0982	85.7	Auto Tm	88.3459	72.2004	20.5209	29.2574	29.4348	0.452111	Manual Ct		Manual	15	21	Manual	0.29434
175	15 (21-1)	MCP-1	SYBR	Unknown	29.2574	85.7	Auto Tm	79.1478	72.2004	20.5209	29.2574	29.4348	0.452111	Manual Ct		Manual	15	21	Manual	0.29434
199	15 (21-1)	MCP-1	SYBR	Unknown	29.9486	86	Auto Tm	49.1076	72.2004	20.5209	29.2574	29.4348	0.452111	Manual Ct		Manual	15	21	Manual	0.29434
152	16 (21-2)	MCP-1	SYBR	Unknown	28.8716	86	Auto Tm	103.306	96.5457	5.93742	29.0059	28.9714	0.0877889	Manual Ct		Manual	15	21	Manual	0.29434
176	16 (21-2)	MCP-1	SYBR	Unknown	29.0367	86	Auto Tm	92.1754	96.5457	5.93742	29.0059	28.9714	0.0877889	Manual Ct		Manual	15	21	Manual	0.29434
200	16 (21-2)	MCP-1	SYBR	Unknown	29.0059	86	Auto Tm	94.1562	96.5457	5.93742	29.0059	28.9714	0.0877889	Manual Ct		Manual	15	21	Manual	0.29434
153	17 (22-1)	MCP-1	SYBR	Unknown	30.8023	85.9	Auto Tm	27.2358	25.1018	2.92999	30.8525	30.9274	0.174956	Manual Ct		Manual	15	21	Manual	0.29434
177	17 (22-1)	MCP-1	SYBR	Unknown	30.8525	85.9	Auto Tm	26.3084	25.1018	2.92999	30.8525	30.9274	0.174956	Manual Ct		Manual	15	21	Manual	0.29434
201	17 (22-1)	MCP-1	SYBR	Unknown	31.1273	85.9	Auto Tm	21.7612	25.1018	2.92999	30.8525	30.9274	0.174956	Manual Ct		Manual	15	21	Manual	0.29434
154	18 (23-1)	MCP-1	SYBR	Unknown	30.7906	85.9	Auto Tm	27.4568	27.7038	4.67834	30.7906	30.7915	0.245547	Manual Ct		Manual	15	21	Manual	0.29434
178	18 (23-1)	MCP-1	SYBR	Unknown	31.0375	85.9	Auto Tm	23.1538	27.7038	4.67834	30.7906	30.7915	0.245547	Manual Ct		Manual	15	21	Manual	0.29434
202	18 (23-1)	MCP-1	SYBR	Unknown	30.5464	85.9	Auto Tm	32.5007	27.7038	4.67834	30.7906	30.7915	0.245547	Manual Ct		Manual	15	21	Manual	0.29434
155	19 (23-2)	MCP-1	SYBR	Unknown	28.8975	85.9	Auto Tm	101.476	89.3533	10.4989	29.1831	29.0882	0.165116	Manual Ct		Manual	15	21	Manual	0.29434
179	19 (23-2)	MCP-1	SYBR	Unknown	29.1831	85.9	Auto Tm	83.3159	89.3533	10.4989	29.1831	29.0882	0.165116	Manual Ct		Manual	15	21	Manual	0.29434
203	19 (23-2)	MCP-1	SYBR	Unknown	29.1839	85.9	Auto Tm	83.2676	89.3533	10.4989	29.1831	29.0882	0.165116	Manual Ct		Manual	15	21	Manual	0.29434
90	2 (11-2)	MCP-1	SYBR	Unknown	27.7558	85.8	Auto Tm	223.225	233.459	9.44262	27.6794	27.6917	0.0589471	Manual Ct		Manual	15	21	Manual	0.29434
114	2 (11-2)	MCP-1	SYBR	Unknown	27.6794	85.8	Auto Tm	235.319	233.459	9.44262	27.6794	27.6917	0.0589471	Manual Ct		Manual	15	21	Manual	0.29434
138	2 (11-2)	MCP-1	SYBR	Unknown	27.6399	85.8	Auto Tm	241.833	233.459	9.44262	27.6794	27.6917	0.0589471	Manual Ct		Manual	15	21	Manual	0.29434
156	20 (24-1)	MCP-1	SYBR	Unknown	31.2324	85.9	Auto Tm	20.238	21.5603	5.43577	31.2324	31.1706	0.357184	Manual Ct		Manual	15	21	Manual	0.29434
180	20 (24-1)	MCP-1	SYBR	Unknown	30.7865	85.9	Auto Tm	27.5352	21.5603	5.43577	31.2324	31.1706	0.357184	Manual Ct		Manual	15	21	Manual	0.29434
204	20 (24-1)	MCP-1	SYBR	Unknown	31.4928	85.9	Auto Tm	16.9077	21.5603	5.43577	31.2324	31.1706	0.357184	Manual Ct		Manual	15	21	Manual	0.29434
157	21 (24-2)	MCP-1	SYBR	Unknown	29.4999	85.9	Auto Tm	66.9469	80.18	18.0793	29.3782	29.2619	0.312857	Manual Ct		Manual	15	21	Manual	0.29434
181	21 (24-2)	MCP-1	SYBR	Unknown	29.3782	85.9	Auto Tm	72.8136	80.18	18.0793	29.3782	29.2619	0.312857	Manual Ct		Manual	15	21	Manual	0.29434
205	21 (24-2)	MCP-1	SYBR	Unknown	28.9075	85.9	Auto Tm	100.78	80.18	18.0793	29.3782	29.2619	0.312857	Manual Ct		Manual	15	21	Manual	0.29434
158	22 (25-2)	MCP-1	SYBR	Unknown	27.9737	85.9	Auto Tm	192.049	173.769	17.7713	28.1274	28.1236	0.148008	Manual Ct		Manual	15	21	Manual	0.29434
182	22 (25-2)	MCP-1	SYBR	Unknown	28.2696	85.9	Auto Tm	156.554	173.769	17.7713	28.1274	28.1236	0.148008	Manual Ct		Manual	15	21	Manual	0.29434
206	22 (25-2)	MCP-1	SYBR	Unknown	28.1274	85.9	Auto Tm	172.706	173.769	17.7713	28.1274	28.1236	0.148008	Manual Ct		Manual	15	21	Manual	0.29434
159	23 (26-1)	MCP-1	SYBR	Unknown	30.6478	85.9	Auto Tm	30.3034	38.4617	7.73866	30.2682	30.3229	0.301214	Manual Ct		Manual	15	21	Manual	0.29434
183	23 (26-1)	MCP-1	SYBR	Unknown	30.0529	85.9	Auto Tm	45.6982	38.4617	7.73866	30.2682	30.3229	0.301214	Manual Ct		Manual	15	21	Manual	0.29434
207	23 (26-1)	MCP-1	SYBR	Unknown	30.2682	85.9	Auto Tm	39.3836	38.4617	7.73866	30.2682	30.3229	0.301214	Manual Ct		Manual	15	21	Manual	0.29434
160	24 (26-2)	MCP-1	SYBR	Unknown	31.4445	85.8	Auto Tm	17.4816	15.2093	1.99026	31.7282	31.6541	0.184094	Manual Ct		Manual	15	21	Manual	0.29434
184	24 (26-2)	MCP-1	SYBR	Unknown	31.7282	85.8	Auto Tm	14.3711	15.2093	1.99026	31.7282	31.6541	0.184094	Manual Ct		Manual	15	21	Manual	0.29434
208	24 (26-2)	MCP-1	SYBR	Unknown	31.7895	85.8	Auto Tm	13.7753	15.2093	1.99026	31.7282	31.6541	0.184094	Manual Ct		Manual	15	21	Manual	0.29434
161	25 (27-1)	MCP-1	SYBR	Unknown	30.6656	85.8	Auto Tm	29.9324	28.3092	3.7267	30.6656	30.7552	0.198523	Manual Ct		Manual	15	21	Manual	0.29434
185	25 (27-1)	MCP-1	SYBR	Unknown	30.9827	85.8	Auto Tm	24.0462	28.3092	3.7267	30.6656	30.7552	0.198523	Manual Ct		Manual	15	21	Manual	0.29434
209	25 (27-1)	MCP-1	SYBR	Unknown	30.6172	85.8	Auto Tm	30.949	28.3092	3.7267	30.6656	30.7552	0.198523	Manual Ct		Manual	15	21	Manual	0.29434
162	26 (27-2)	MCP-1	SYBR	Unknown	30.3875	85.8	Auto Tm	36.2699	35.7045	3.24887	30.3875	30.4143	0.133708	Manual Ct		Manual	15	21	Manual	0.29434
186	26 (27-2)	MCP-1	SYBR	Unknown	30.5594	85.8	Auto Tm	32.21	35.7045	3.24887	30.3875	30.4143	0.133708	Manual Ct		Manual	15	21	Manual	0.29434
210	26 (27-2)	MCP-1	SYBR	Unknown	30.2961	85.8	Auto Tm	38.6335	35.7045	3.24887	30.3875	30.4143	0.133708	Manual Ct		Manual	15	21	Manual	0.29434
163	27 (27-3)	MCP-1	SYBR	Unknown	30.6533	85.8	Auto Tm	30.1885	24.431	5.31801	31.0221	30.9822	0.310893	Manual Ct		Manual	15	21	Manual	0.29434
187	27 (27-3)	MCP-1	SYBR	Unknown	31.2712	85.8	Auto Tm	19.703	24.431	5.31801	31.0221	30.9822	0.310893	Manual Ct		Manual	15	21	Manual	0.29434
211	27 (27-3)	MCP-1	SYBR	Unknown	31.0221	85.8	Auto Tm	23.4014	24.431	5.31801	31.0221	30.9822	0.310893	Manual Ct		Manual	15	21	Manual	0.29434
164	28 (28-1)	MCP-1	SYBR	Unknown	30.8136	85.8	Auto Tm	27.0246	25.7853	3.29762	30.8136	30.8899	0.192079	Manual Ct		Manual	15	21	Manual	0.29434
188	28 (28-1)	MCP-1	SYBR	Unknown	30.7477	85.8	Auto Tm	28.2836	25.7853	3.29762	30.8136	30.8899	0.192079	Manual Ct		Manual	15	21	Manual	0.29434
212	28 (28-1)	MCP-1	SYBR	Unknown	31.1084	85.8	Auto Tm	22.0475	25.7853	3.29762	30.8136	30.8899	0.192079	Manual Ct		Manual	15	21	Manual	0.29434
165	29 (28-2)	MCP-1	SYBR	Unknown	31.0971	85.6	Auto Tm	22.2195	23.5138	3.17955	31.0971	31.0236	0.190222	Manual Ct		Manual	15	21	Manual	0.29434
189	29 (28-2)	MCP-1	SYBR	Unknown	30.8076	85.6	Auto Tm	27.1364	23.5138	3.17955	31.0971	31.0236	0.190222	Manual Ct		Manual	15	21	Manual	0.29434
213	29 (28-2)	MCP-1	SYBR	Unknown	31.1662	85.6	Auto Tm	21.1855	23.5138	3.17955	31.0971	31.0236	0.190222	Manual Ct		Manual	15	21	Manual	0.29434
91	3 (12-1)	MCP-1	SYBR	Unknown	30.4182	85.6	Auto Tm	35.5098	39.1862	5.27604	30.3658	30.2839	0.189035	Manual Ct		Manual	15	21	Manual	0.29434
115	3 (12-1)	MCP-1	SYBR	Unknown	30.0677	85.8	Auto Tm	45.2315	39.1862	5.27604	30.3658	30.2839	0.189035	Manual Ct		Manual	15	21	Manual	0.29434
139	3 (12-1)	MCP-1	SYBR	Unknown	30.3658	85.8	Auto Tm	36.8174	39.1862	5.27604	30.3658	30.2839	0.189035	Manual Ct		Manual	15	21	Manual	0.29434
166	30 (28-3)	MCP-1	SYBR	Unknown	30.9034	85.5	Auto Tm	25.3992	22.9102	2.18477	31.1101	31.0571	0.13516	Manual Ct		Manual	15	21	Manual	0.29434
190	30 (28-3)	MCP-1	SYBR	Unknown	31.1577	85.5	Auto Tm	21.3095	22.9102	2.18477	31.1101	31.0571	0.13516	Manual Ct		Manual	15	21	Manual	0.29434
214	30 (28-3)	MCP-1	SYBR	Unknown	31.1101	85.5	Auto Tm	22.022	22.9102	2.18477	31.1101	31.0571	0.13516	Manual Ct		Manual	15	21	Manual	0.29434
167	31 (29-1)	MCP-1	SYBR	Unknown	26.8192	85.5	Auto Tm	426.208	418.676	38.4648	26.8192	26.8492	0.135201	Manual Ct		Manual	15	21	Manual	0.29434
191	31 (29-1)	MCP-1	SYBR	Unknown	26.9968	85.5	Auto Tm	377.003	418.676	38.4648	26.8192	26.8492	0.135201	Manual Ct		Manual	15	21	Manual	0.29434
215	31 (29-1)	MCP-1	SYBR	Unknown	26.7315	85.5	Auto Tm	452.818	418.676	38.4648	26.8192	26.8492	0.135201	Manual Ct		Manual	15	21	Manual	0.29434
168	32 (29-2)	MCP-1	SYBR	Unknown	28.2521	85.5	Auto Tm	158.454	138.53	20.4848	28.4355	28.4575	0.217196	Manual Ct		Manual	15	21	Manual	0.29434
192	32 (29-2)	MCP-1	SYBR	Unknown	28.4355	85.5	Auto Tm	139.61	138.53	20.4848	28.4355	28.4575	0.217196	Manual Ct		Manual	15	21	Manual	0.29434
216	32 (29-2)	MCP-1	SYBR	Unknown	28.6849	85.5	Auto Tm	117.527	138.53	20.4848	28.4355	28.4575	0.217196	Manual Ct		Manual	15	21	Manual	0.29434
217	33 (30-1)	MCP-1	SYBR	Unknown	30.1503	85.5	Auto Tm	42.7233	42.3145	11.0284	30.1503	30.1986	0.390354	Manual Ct		Manual	15	21	Manual	0.29434
241	33 (30-1)	MCP-1	SYBR	Unknown	29.8346	85.5	Auto Tm	53.1328	42.3145	11.0284	30.1503	30.1986	0.390354	Manual Ct		Manual	15	21	Manual	0.29434
265	33 (30-1)	MCP-1	SYBR	Unknown	30.6108	85.5	Auto Tm	31.0874	42.3145	11.0284	30.1503	30.1986	0.390354	Manual Ct		Manual	15	21	Manual	0.29434
218	34 (30-2)	MCP-1	SYBR	Unknown	26.8177	85.7	Auto Tm	426.652	421.899	34.8454	26.8177	26.8372	0.120911	Manual Ct		Manual	15	21	Manual	0.29434
242	34 (30-2)	MCP-1	SYBR	Unknown	26.9667	85.4	Auto Tm	384.921	421.899	34.8454	26.8177	26.8372	0.120911	Manual Ct		Manual	15	21	Manual	0.29434
266	34 (30-2)	MCP-1	SYBR	Unknown	26.7273	85.4	Auto Tm	454.123	421.899	34.8454	26.8177	26.8372	0.120911	Manual Ct		Manual	15	21	Manual	0.29434
219	35 (31-1)	MCP-1	SYBR	Unknown	28.1905	85.7	Auto Tm	165.347	181.59	14.7527	28.0258	28.058	0.11962	Manual Ct		Manual	15	21	Manual	0.29434
243	35 (31-1)	MCP-1	SYBR	Unknown	27.9579	85.7	Auto Tm	194.157	181.59	14.7527	28.0258	28.058	0.11962	Manual Ct		Manual	15	21	Manual	0.29434
267	35 (31-1)	MCP-1	SYBR	Unknown	28.0258	85.7	Auto Tm	185.265	181.59	14.7527	28.0258	28.058	0.11962	Manual Ct		Manual	15	21	Manual	0.29434
220	36 (31-2)	MCP-1	SYBR	Unknown	28.808	85.7	Auto Tm	107.948	120.212	12.5932	28.6598	28.6574	0.151736	Manual Ct		Manual	15	21	Manual	0.29434
244	36 (31-2)	MCP-1	SYBR	Unknown	28.6598	85.7	Auto Tm	119.579	120.212	12.5932	28.6598	28.6574	0.151736	Manual Ct		Manual	15	21	Manual	0.29434
268	36 (31-2)	MCP-1	SYBR	Unknown	28.5045	85.7	Auto Tm	133.11	120.212	12.5932	28.6598	28.6574	0.151736	Manual Ct		Manual	15	21	Manual	0.29434
221	37 (32-1)	MCP-1	SYBR	Unknown	31.3305	85.7	Auto Tm	18.9125	18.6428	1.39138	31.3305	31.3541	0.109439	Manual Ct		Manual	15	21	Manual	0.29434
245	37 (32-1)	MCP-1	SYBR	Unknown	31.2583	85.7	Auto Tm	19.8797	18.6428	1.39138	31.3305	31.3541	0.109439	Manual Ct		Manual	15	21	Manual	0.29434
269	37 (32-1)	MCP-1	SYBR	Unknown	31.4733	85.7	Auto Tm	17.1364	18.6428	1.39138	31.3305	31.3541	0.109439	Manual Ct		Manual	15	21	Manual	0.29434
222	38 (A)	MCP-1	SYBR	Unknown	31.1034	85.7	Auto Tm	22.1241	19.5522	4.09615	31.1311	31.3058	0.32682	Manual Ct		Manual	15	21	Manual	0.29434
246	38 (A)	MCP-1	SYBR	Unknown	31.1311	85.7	Auto Tm	21.704	19.5522	4.09615	31.1311	31.3058	0.32682	Manual Ct		Manual	15	21	Manual	0.29434
270	38 (A)	MCP-1	SYBR	Unknown	31.6828	85.7	Auto Tm	14.8286	19.5522	4.09615	31.1311	31.3058	0.32682	Manual Ct		Manual	15	21	Manual	0.29434
223	39 (G)	MCP-1	SYBR	Unknown	30.3944	85.7	Auto Tm	36.0981	40.4862	4.0048	30.1953	30.2331	0.146117	Manual Ct		Manual	15	21	Manual	0.29434
247	39 (G)	MCP-1	SYBR	Unknown	30.1095	85.7	Auto Tm	43.944	40.4862	4.0048	30.1953	30.2331	0.146117	Manual Ct		Manual	15	21	Manual	0.29434
271	39 (G)	MCP-1	SYBR	Unknown	30.1953	85.7	Auto Tm	41.4163	40.4862	4.0048	30.1953	30.2331	0.146117	Manual Ct		Manual	15	21	Manual	0.29434
92	4 (12-2)	MCP-1	SYBR	Unknown	29.2113	85.6	Auto Tm	81.7111	87.0234	9.45838	29.2113	29.1255	0.153046	Manual Ct		Manual	15	21	Manual	0.29434
116	4 (12-2)	MCP-1	SYBR	Unknown	28.9488	85.6	Auto Tm	97.9437	87.0234	9.45838	29.2113	29.1255	0.153046	Manual Ct		Manual	15	21	Manual	0.29434
140	4 (12-2)	MCP-1	SYBR	Unknown	29.2165	85.6	Auto Tm	81.4155	87.0234	9.45838	29.2113	29.1255	0.153046	Manual Ct		Manual	15	21	Manual	0.29434
224	40 (H)	MCP-1	SYBR	Unknown	29.9806	86	Auto Tm	48.0355	41.4029	9.14453	30.0687	30.2218	0.344368	Manual Ct		Manual	15	21	Manual	0.29434
248	40 (H)	MCP-1	SYBR	Unknown	30.0687	85.7	Auto Tm	45.2021	41.4029	9.14453	30.0687	30.2218	0.344368	Manual Ct		Manual	15	21	Manual	0.29434
272	40 (H)	MCP-1	SYBR	Unknown	30.6162	85.7	Auto Tm	30.9712	41.4029	9.14453	30.0687	30.2218	0.344368	Manual Ct		Manual	15	21	Manual	0.29434
93	5 (13-1)	MCP-1	SYBR	Unknown	30.908	85.6	Auto Tm	25.3188	23.4429	6.38857	30.908	31.0596	0.428655	Manual Ct		Manual	15	21	Manual	0.29434
117	5 (13-1)	MCP-1	SYBR	Unknown	31.5435	85.6	Auto Tm	16.3264	23.4429	6.38857	30.908	31.0596	0.428655	Manual Ct		Manual	15	21	Manual	0.29434
141	5 (13-1)	MCP-1	SYBR	Unknown	30.7273	85.6	Auto Tm	28.6835	23.4429	6.38857	30.908	31.0596	0.428655	Manual Ct		Manual	15	21	Manual	0.29434
94	6 (14-1)	MCP-1	SYBR	Unknown	30.9152	85.5	Auto Tm	25.1936	30.5219	4.65734	30.5439	30.6494	0.231875	Manual Ct		Manual	15	21	Manual	0.29434
118	6 (14-1)	MCP-1	SYBR	Unknown	30.5439	85.5	Auto Tm	32.5558	30.5219	4.65734	30.5439	30.6494	0.231875	Manual Ct		Manual	15	21	Manual	0.29434
142	6 (14-1)	MCP-1	SYBR	Unknown	30.4889	85.5	Auto Tm	33.8164	30.5219	4.65734	30.5439	30.6494	0.231875	Manual Ct		Manual	15	21	Manual	0.29434
95	7 (15-1)	MCP-1	SYBR	Unknown	28.5409	85.5	Auto Tm	129.807	117.174	10.9766	28.7579	28.6933	0.132481	Manual Ct		Manual	15	21	Manual	0.29434
119	7 (15-1)	MCP-1	SYBR	Unknown	28.7579	85.5	Auto Tm	111.749	117.174	10.9766	28.7579	28.6933	0.132481	Manual Ct		Manual	15	21	Manual	0.29434
143	7 (15-1)	MCP-1	SYBR	Unknown	28.7812	85.5	Auto Tm	109.965	117.174	10.9766	28.7579	28.6933	0.132481	Manual Ct		Manual	15	21	Manual	0.29434
96	8 (15-2)	MCP-1	SYBR	Unknown	28.8497	85.5	Auto Tm	104.88	111.519	15.7583	28.8497	28.7701	0.198413	Manual Ct		Manual	15	21	Manual	0.29434
120	8 (15-2)	MCP-1	SYBR	Unknown	28.9163	85.5	Auto Tm	100.167	111.519	15.7583	28.8497	28.7701	0.198413	Manual Ct		Manual	15	21	Manual	0.29434
144	8 (15-2)	MCP-1	SYBR	Unknown	28.5442	85.5	Auto Tm	129.511	111.519	15.7583	28.8497	28.7701	0.198413	Manual Ct		Manual	15	21	Manual	0.29434
145	9 (16-1)	MCP-1	SYBR	Unknown	30.6477	85.5	Auto Tm	30.3043	31.8372	2.33506	30.6298	30.5788	0.104218	Manual Ct		Manual	15	21	Manual	0.29434
169	9 (16-1)	MCP-1	SYBR	Unknown	30.6298	85.5	Auto Tm	30.6827	31.8372	2.33506	30.6298	30.5788	0.104218	Manual Ct		Manual	15	21	Manual	0.29434
193	9 (16-1)	MCP-1	SYBR	Unknown	30.4589	85.5	Auto Tm	34.5247	31.8372	2.33506	30.6298	30.5788	0.104218	Manual Ct		Manual	15	21	Manual	0.29434
371	Gene 2 Standard (1)	MCP-1	SYBR	Standard	35.714	85.6	Auto Tm	1						Manual Ct		Manual	15	21	Manual	0.29434
369	Gene 2 Standard (10)	MCP-1	SYBR	Standard	32.0014	85.7	Auto Tm	10						Manual Ct		Manual	15	21	Manual	0.29434
367	Gene 2 Standard (100)	MCP-1	SYBR	Standard	29.0447	86	Auto Tm	100						Manual Ct		Manual	15	21	Manual	0.29434
380	NTC Gene 2	MCP-1	SYBR	NTC	Undetermined	61.8	Auto Tm	0						Manual Ct		Manual	15	21	Manual	0.29434						TRUE
383	RT Negative 2	MCP-1	SYBR	NTC	Undetermined	61.7	Auto Tm	0						Manual Ct		Manual	15	21	Manual	0.29434						TRUE
Slope	-3.33463	cycles/log decade
Y-Intercept		35.588
R^2		0.995735
Well	Sample Name	Detector Name	Reporter	Task	Ct	Tm Value	Tm Type	Quantity	Qty Mean	Qty StdDev	Ct Median	Ct Mean	Ct StdDev	Ct Type	Template Name	Baseline Type	Baseline Start	Baseline Stop	Threshold Type	Threshold	FOS	HMD	LME	EW	BPR	NAW	HNS	HRN	EAF	BAF	TAF	CAF
225	1 (11-1)	NLRP3	SYBR	Unknown	28.752	83	Auto Tm	81.3945	67.9011	11.8552	29.0403	28.9689	0.191498	Manual Ct		Manual	17	22	Manual	0.401598
249	1 (11-1)	NLRP3	SYBR	Unknown	29.0403	83.2	Auto Tm	63.1527	67.9011	11.8552	29.0403	28.9689	0.191498	Manual Ct		Manual	17	22	Manual	0.401598
273	1 (11-1)	NLRP3	SYBR	Unknown	29.1145	83	Auto Tm	59.1562	67.9011	11.8552	29.0403	28.9689	0.191498	Manual Ct		Manual	17	22	Manual	0.401598
234	10 (17-1)	NLRP3	SYBR	Unknown	27.7188	82.9	Auto Tm	202.112	179.616	20.6413	27.8812	27.8578	0.12885	Manual Ct		Manual	17	22	Manual	0.401598
258	10 (17-1)	NLRP3	SYBR	Unknown	27.9733	82.9	Auto Tm	161.548	179.616	20.6413	27.8812	27.8578	0.12885	Manual Ct		Manual	17	22	Manual	0.401598					TRUE
282	10 (17-1)	NLRP3	SYBR	Unknown	27.8812	82.9	Auto Tm	175.187	179.616	20.6413	27.8812	27.8578	0.12885	Manual Ct		Manual	17	22	Manual	0.401598
235	11 (17-2)	NLRP3	SYBR	Unknown	27.2338	82.9	Auto Tm	309.75	300.425	8.47547	27.2765	27.2688	0.0318996	Manual Ct		Manual	17	22	Manual	0.401598
259	11 (17-2)	NLRP3	SYBR	Unknown	27.2962	82.9	Auto Tm	293.19	300.425	8.47547	27.2765	27.2688	0.0318996	Manual Ct		Manual	17	22	Manual	0.401598
283	11 (17-2)	NLRP3	SYBR	Unknown	27.2765	82.9	Auto Tm	298.336	300.425	8.47547	27.2765	27.2688	0.0318996	Manual Ct		Manual	17	22	Manual	0.401598
236	12 (18-1)	NLRP3	SYBR	Unknown	29.3435	83.1	Auto Tm	48.3576	58.4222	9.57411	29.1081	29.1392	0.190634	Manual Ct		Manual	17	22	Manual	0.401598
260	12 (18-1)	NLRP3	SYBR	Unknown	29.1081	82.9	Auto Tm	59.4934	58.4222	9.57411	29.1081	29.1392	0.190634	Manual Ct		Manual	17	22	Manual	0.401598
284	12 (18-1)	NLRP3	SYBR	Unknown	28.966	82.9	Auto Tm	67.4157	58.4222	9.57411	29.1081	29.1392	0.190634	Manual Ct		Manual	17	22	Manual	0.401598
237	13 (19-1)	NLRP3	SYBR	Unknown	27.9208	82.9	Auto Tm	169.182	168.114	8.12966	27.9208	27.9289	0.0552385	Manual Ct		Manual	17	22	Manual	0.401598
261	13 (19-1)	NLRP3	SYBR	Unknown	27.9878	82.9	Auto Tm	159.504	168.114	8.12966	27.9208	27.9289	0.0552385	Manual Ct		Manual	17	22	Manual	0.401598
285	13 (19-1)	NLRP3	SYBR	Unknown	27.8782	82.9	Auto Tm	175.658	168.114	8.12966	27.9208	27.9289	0.0552385	Manual Ct		Manual	17	22	Manual	0.401598
238	14 (20-1)	NLRP3	SYBR	Unknown	28.5082	82.9	Auto Tm	100.877	115.943	15.1897	28.3525	28.3566	0.149555	Manual Ct		Manual	17	22	Manual	0.401598
262	14 (20-1)	NLRP3	SYBR	Unknown	28.2092	82.9	Auto Tm	131.253	115.943	15.1897	28.3525	28.3566	0.149555	Manual Ct		Manual	17	22	Manual	0.401598
286	14 (20-1)	NLRP3	SYBR	Unknown	28.3525	82.9	Auto Tm	115.7	115.943	15.1897	28.3525	28.3566	0.149555	Manual Ct		Manual	17	22	Manual	0.401598
239	15 (21-1)	NLRP3	SYBR	Unknown	29.2463	82.9	Auto Tm	52.6757	63.5678	10.3277	29.0109	29.0431	0.189118	Manual Ct		Manual	17	22	Manual	0.401598
263	15 (21-1)	NLRP3	SYBR	Unknown	29.0109	82.9	Auto Tm	64.8087	63.5678	10.3277	29.0109	29.0431	0.189118	Manual Ct		Manual	17	22	Manual	0.401598
287	15 (21-1)	NLRP3	SYBR	Unknown	28.8722	82.9	Auto Tm	73.2191	63.5678	10.3277	29.0109	29.0431	0.189118	Manual Ct		Manual	17	22	Manual	0.401598
240	16 (21-2)	NLRP3	SYBR	Unknown	28.6296	82.9	Auto Tm	90.6553	74.0602	14.3719	28.9931	28.8727	0.21054	Manual Ct		Manual	17	22	Manual	0.401598
264	16 (21-2)	NLRP3	SYBR	Unknown	28.9954	82.6	Auto Tm	65.6974	74.0602	14.3719	28.9931	28.8727	0.21054	Manual Ct		Manual	17	22	Manual	0.401598
288	16 (21-2)	NLRP3	SYBR	Unknown	28.9931	82.6	Auto Tm	65.828	74.0602	14.3719	28.9931	28.8727	0.21054	Manual Ct		Manual	17	22	Manual	0.401598
289	17 (22-1)	NLRP3	SYBR	Unknown	30.5831	82.5	Auto Tm	16.239	27.5148	12.2698	30.0605	30.0621	0.520223	Manual Ct		Manual	17	22	Manual	0.401598
313	17 (22-1)	NLRP3	SYBR	Unknown	30.0605	82.5	Auto Tm	25.7236	27.5148	12.2698	30.0605	30.0621	0.520223	Manual Ct		Manual	17	22	Manual	0.401598
337	17 (22-1)	NLRP3	SYBR	Unknown	29.5426	82.5	Auto Tm	40.5817	27.5148	12.2698	30.0605	30.0621	0.520223	Manual Ct		Manual	17	22	Manual	0.401598
290	18 (23-1)	NLRP3	SYBR	Unknown	29.8982	82.8	Auto Tm	29.6761	28.2954	7.34447	29.8982	29.98	0.313462	Manual Ct		Manual	17	22	Manual	0.401598
314	18 (23-1)	NLRP3	SYBR	Unknown	30.3262	82.5	Auto Tm	20.3586	28.2954	7.34447	29.8982	29.98	0.313462	Manual Ct		Manual	17	22	Manual	0.401598
338	18 (23-1)	NLRP3	SYBR	Unknown	29.7155	82.5	Auto Tm	34.8516	28.2954	7.34447	29.8982	29.98	0.313462	Manual Ct		Manual	17	22	Manual	0.401598
291	19 (23-2)	NLRP3	SYBR	Unknown	29.5223	82.8	Auto Tm	41.3161	48.962	7.60387	29.3274	29.3386	0.178271	Manual Ct		Manual	17	22	Manual	0.401598
315	19 (23-2)	NLRP3	SYBR	Unknown	29.1662	82.5	Auto Tm	56.5231	48.962	7.60387	29.3274	29.3386	0.178271	Manual Ct		Manual	17	22	Manual	0.401598
339	19 (23-2)	NLRP3	SYBR	Unknown	29.3274	82.5	Auto Tm	49.0468	48.962	7.60387	29.3274	29.3386	0.178271	Manual Ct		Manual	17	22	Manual	0.401598
226	2 (11-2)	NLRP3	SYBR	Unknown	28.0902	83.2	Auto Tm	145.752	147.443	10.5282	28.0902	28.079	0.0805845	Manual Ct		Manual	17	22	Manual	0.401598
250	2 (11-2)	NLRP3	SYBR	Unknown	28.1534	83.2	Auto Tm	137.863	147.443	10.5282	28.0902	28.079	0.0805845	Manual Ct		Manual	17	22	Manual	0.401598
274	2 (11-2)	NLRP3	SYBR	Unknown	27.9934	83.2	Auto Tm	158.714	147.443	10.5282	28.0902	28.079	0.0805845	Manual Ct		Manual	17	22	Manual	0.401598
292	20 (24-1)	NLRP3	SYBR	Unknown	29.7629	82.8	Auto Tm	33.4298	29.3374	3.55658	29.981	29.9166	0.133676	Manual Ct		Manual	17	22	Manual	0.401598
316	20 (24-1)	NLRP3	SYBR	Unknown	30.0058	82.8	Auto Tm	26.9938	29.3374	3.55658	29.981	29.9166	0.133676	Manual Ct		Manual	17	22	Manual	0.401598
340	20 (24-1)	NLRP3	SYBR	Unknown	29.981	82.5	Auto Tm	27.5886	29.3374	3.55658	29.981	29.9166	0.133676	Manual Ct		Manual	17	22	Manual	0.401598
293	21 (24-2)	NLRP3	SYBR	Unknown	29.001	82.7	Auto Tm	65.3756	71.7299	12.0487	29.001	28.9057	0.183279	Manual Ct		Manual	17	22	Manual	0.401598
317	21 (24-2)	NLRP3	SYBR	Unknown	28.6944	82.7	Auto Tm	85.6257	71.7299	12.0487	29.001	28.9057	0.183279	Manual Ct		Manual	17	22	Manual	0.401598
341	21 (24-2)	NLRP3	SYBR	Unknown	29.0218	82.7	Auto Tm	64.1886	71.7299	12.0487	29.001	28.9057	0.183279	Manual Ct		Manual	17	22	Manual	0.401598
294	22 (25-2)	NLRP3	SYBR	Unknown	29.1594	83	Auto Tm	56.8635	63.9245	12.6456	29.1594	29.0404	0.214495	Manual Ct		Manual	17	22	Manual	0.401598
318	22 (25-2)	NLRP3	SYBR	Unknown	28.7928	83	Auto Tm	78.5238	63.9245	12.6456	29.1594	29.0404	0.214495	Manual Ct		Manual	17	22	Manual	0.401598
342	22 (25-2)	NLRP3	SYBR	Unknown	29.169	82.7	Auto Tm	56.3861	63.9245	12.6456	29.1594	29.0404	0.214495	Manual Ct		Manual	17	22	Manual	0.401598
295	23 (26-1)	NLRP3	SYBR	Unknown	29.5081	83	Auto Tm	41.8355	48.5224	8.35802	29.4042	29.3504	0.190297	Manual Ct		Manual	17	22	Manual	0.401598
319	23 (26-1)	NLRP3	SYBR	Unknown	29.139	83	Auto Tm	57.8925	48.5224	8.35802	29.4042	29.3504	0.190297	Manual Ct		Manual	17	22	Manual	0.401598
343	23 (26-1)	NLRP3	SYBR	Unknown	29.4042	83	Auto Tm	45.8393	48.5224	8.35802	29.4042	29.3504	0.190297	Manual Ct		Manual	17	22	Manual	0.401598
296	24 (26-2)	NLRP3	SYBR	Unknown	30.0439	82.7	Auto Tm	26.1028	24.2795	2.65265	30.0705	30.1309	0.12834	Manual Ct		Manual	17	22	Manual	0.401598
320	24 (26-2)	NLRP3	SYBR	Unknown	30.2783	83	Auto Tm	21.2364	24.2795	2.65265	30.0705	30.1309	0.12834	Manual Ct		Manual	17	22	Manual	0.401598
344	24 (26-2)	NLRP3	SYBR	Unknown	30.0705	82.7	Auto Tm	25.4994	24.2795	2.65265	30.0705	30.1309	0.12834	Manual Ct		Manual	17	22	Manual	0.401598
297	25 (27-1)	NLRP3	SYBR	Unknown	28.8253	83.2	Auto Tm	76.3106	68.4454	12.2259	28.85	28.962	0.215662	Manual Ct		Manual	17	22	Manual	0.401598
321	25 (27-1)	NLRP3	SYBR	Unknown	29.2106	83	Auto Tm	54.3602	68.4454	12.2259	28.85	28.962	0.215662	Manual Ct		Manual	17	22	Manual	0.401598
345	25 (27-1)	NLRP3	SYBR	Unknown	28.85	83	Auto Tm	74.6656	68.4454	12.2259	28.85	28.962	0.215662	Manual Ct		Manual	17	22	Manual	0.401598
298	26 (27-2)	NLRP3	SYBR	Unknown	28.6808	83.2	Auto Tm	86.6573	76.4091	11.3443	28.7953	28.8324	0.173217	Manual Ct		Manual	17	22	Manual	0.401598
322	26 (27-2)	NLRP3	SYBR	Unknown	28.7953	83.2	Auto Tm	78.3508	76.4091	11.3443	28.7953	28.8324	0.173217	Manual Ct		Manual	17	22	Manual	0.401598
346	26 (27-2)	NLRP3	SYBR	Unknown	29.0212	83.2	Auto Tm	64.2193	76.4091	11.3443	28.7953	28.8324	0.173217	Manual Ct		Manual	17	22	Manual	0.401598
299	27 (27-3)	NLRP3	SYBR	Unknown	29.0485	83.2	Auto Tm	62.6943	58.0257	7.50317	29.061	29.1431	0.15323	Manual Ct		Manual	17	22	Manual	0.401598
323	27 (27-3)	NLRP3	SYBR	Unknown	29.3199	83.2	Auto Tm	49.3707	58.0257	7.50317	29.061	29.1431	0.15323	Manual Ct		Manual	17	22	Manual	0.401598
347	27 (27-3)	NLRP3	SYBR	Unknown	29.061	83.2	Auto Tm	62.0121	58.0257	7.50317	29.061	29.1431	0.15323	Manual Ct		Manual	17	22	Manual	0.401598
300	28 (28-1)	NLRP3	SYBR	Unknown	29.8574	83.2	Auto Tm	30.7602	28.9184	1.86178	29.926	29.9291	0.0733234	Manual Ct		Manual	17	22	Manual	0.401598
324	28 (28-1)	NLRP3	SYBR	Unknown	29.926	83	Auto Tm	28.9577	28.9184	1.86178	29.926	29.9291	0.0733234	Manual Ct		Manual	17	22	Manual	0.401598
348	28 (28-1)	NLRP3	SYBR	Unknown	30.0039	83	Auto Tm	27.0373	28.9184	1.86178	29.926	29.9291	0.0733234	Manual Ct		Manual	17	22	Manual	0.401598
301	29 (28-2)	NLRP3	SYBR	Unknown	29.0537	83.2	Auto Tm	62.4121	61.0286	4.9151	29.0537	29.0816	0.0931411	Manual Ct		Manual	17	22	Manual	0.401598
325	29 (28-2)	NLRP3	SYBR	Unknown	29.0057	83.2	Auto Tm	65.1036	61.0286	4.9151	29.0537	29.0816	0.0931411	Manual Ct		Manual	17	22	Manual	0.401598
349	29 (28-2)	NLRP3	SYBR	Unknown	29.1856	82.9	Auto Tm	55.57	61.0286	4.9151	29.0537	29.0816	0.0931411	Manual Ct		Manual	17	22	Manual	0.401598
227	3 (12-1)	NLRP3	SYBR	Unknown	29.5558	83.2	Auto Tm	40.1142	46.9164	6.35643	29.3536	29.385	0.157425	Manual Ct		Manual	17	22	Manual	0.401598
251	3 (12-1)	NLRP3	SYBR	Unknown	29.2457	83.2	Auto Tm	52.7053	46.9164	6.35643	29.3536	29.385	0.157425	Manual Ct		Manual	17	22	Manual	0.401598
275	3 (12-1)	NLRP3	SYBR	Unknown	29.3536	83.2	Auto Tm	47.9297	46.9164	6.35643	29.3536	29.385	0.157425	Manual Ct		Manual	17	22	Manual	0.401598
302	30 (28-3)	NLRP3	SYBR	Unknown	28.4615	83.2	Auto Tm	105.112	78.4601	27.1551	28.7796	28.8427	0.416283	Manual Ct		Manual	17	22	Manual	0.401598
326	30 (28-3)	NLRP3	SYBR	Unknown	29.2869	83.2	Auto Tm	50.8282	78.4601	27.1551	28.7796	28.8427	0.416283	Manual Ct		Manual	17	22	Manual	0.401598
350	30 (28-3)	NLRP3	SYBR	Unknown	28.7796	83.2	Auto Tm	79.4402	78.4601	27.1551	28.7796	28.8427	0.416283	Manual Ct		Manual	17	22	Manual	0.401598
303	31 (29-1)	NLRP3	SYBR	Unknown	27.5304	83.2	Auto Tm	238.571	260.352	33.5027	27.5069	27.4372	0.141633	Manual Ct		Manual	17	22	Manual	0.401598
327	31 (29-1)	NLRP3	SYBR	Unknown	27.5069	82.9	Auto Tm	243.556	260.352	33.5027	27.5069	27.4372	0.141633	Manual Ct		Manual	17	22	Manual	0.401598
351	31 (29-1)	NLRP3	SYBR	Unknown	27.2742	82.9	Auto Tm	298.931	260.352	33.5027	27.5069	27.4372	0.141633	Manual Ct		Manual	17	22	Manual	0.401598
304	32 (29-2)	NLRP3	SYBR	Unknown	28.2811	83.2	Auto Tm	123.203	116.694	8.99883	28.3067	28.3451	0.0895356	Manual Ct		Manual	17	22	Manual	0.401598
328	32 (29-2)	NLRP3	SYBR	Unknown	28.4474	83.2	Auto Tm	106.425	116.694	8.99883	28.3067	28.3451	0.0895356	Manual Ct		Manual	17	22	Manual	0.401598
352	32 (29-2)	NLRP3	SYBR	Unknown	28.3067	83.2	Auto Tm	120.455	116.694	8.99883	28.3067	28.3451	0.0895356	Manual Ct		Manual	17	22	Manual	0.401598
305	33 (30-1)	NLRP3	SYBR	Unknown	29.1604	83.2	Auto Tm	56.8162	66.9739	9.03242	28.9233	28.9808	0.158873	Manual Ct		Manual	17	22	Manual	0.401598
329	33 (30-1)	NLRP3	SYBR	Unknown	28.8586	83.2	Auto Tm	74.1023	66.9739	9.03242	28.9233	28.9808	0.158873	Manual Ct		Manual	17	22	Manual	0.401598
353	33 (30-1)	NLRP3	SYBR	Unknown	28.9233	82.9	Auto Tm	70.0031	66.9739	9.03242	28.9233	28.9808	0.158873	Manual Ct		Manual	17	22	Manual	0.401598
306	34 (30-2)	NLRP3	SYBR	Unknown	27.9109	82.9	Auto Tm	170.674	179.788	21.675	27.9109	27.8571	0.133299	Manual Ct		Manual	17	22	Manual	0.401598
330	34 (30-2)	NLRP3	SYBR	Unknown	27.7053	82.9	Auto Tm	204.532	179.788	21.675	27.9109	27.8571	0.133299	Manual Ct		Manual	17	22	Manual	0.401598
354	34 (30-2)	NLRP3	SYBR	Unknown	27.9551	82.9	Auto Tm	164.159	179.788	21.675	27.9109	27.8571	0.133299	Manual Ct		Manual	17	22	Manual	0.401598
307	35 (31-1)	NLRP3	SYBR	Unknown	27.3984	82.9	Auto Tm	267.971	215.225	45.9877	27.7644	27.6637	0.231969	Manual Ct		Manual	17	22	Manual	0.401598
331	35 (31-1)	NLRP3	SYBR	Unknown	27.8283	82.9	Auto Tm	183.537	215.225	45.9877	27.7644	27.6637	0.231969	Manual Ct		Manual	17	22	Manual	0.401598
355	35 (31-1)	NLRP3	SYBR	Unknown	27.7644	82.9	Auto Tm	194.167	215.225	45.9877	27.7644	27.6637	0.231969	Manual Ct		Manual	17	22	Manual	0.401598
308	36 (31-2)	NLRP3	SYBR	Unknown	28.1317	82.9	Auto Tm	140.522	168.718	24.5208	27.8468	27.9325	0.173077	Manual Ct		Manual	17	22	Manual	0.401598
332	36 (31-2)	NLRP3	SYBR	Unknown	27.819	82.9	Auto Tm	185.055	168.718	24.5208	27.8468	27.9325	0.173077	Manual Ct		Manual	17	22	Manual	0.401598
356	36 (31-2)	NLRP3	SYBR	Unknown	27.8468	82.9	Auto Tm	180.576	168.718	24.5208	27.8468	27.9325	0.173077	Manual Ct		Manual	17	22	Manual	0.401598
309	37 (32-1)	NLRP3	SYBR	Unknown	29.5072	82.9	Auto Tm	41.8663	34.3391	8.629	29.6715	29.7584	0.304101	Manual Ct		Manual	17	22	Manual	0.401598
333	37 (32-1)	NLRP3	SYBR	Unknown	30.0965	82.9	Auto Tm	24.9217	34.3391	8.629	29.6715	29.7584	0.304101	Manual Ct		Manual	17	22	Manual	0.401598
357	37 (32-1)	NLRP3	SYBR	Unknown	29.6715	82.6	Auto Tm	36.2293	34.3391	8.629	29.6715	29.7584	0.304101	Manual Ct		Manual	17	22	Manual	0.401598
310	38 (A)	NLRP3	SYBR	Unknown	30.2835	82.6	Auto Tm	21.1395	20.7848	9.27072	30.2835	30.3883	0.557515	Manual Ct		Manual	17	22	Manual	0.401598
334	38 (A)	NLRP3	SYBR	Unknown	29.8906	82.6	Auto Tm	29.8731	20.7848	9.27072	30.2835	30.3883	0.557515	Manual Ct		Manual	17	22	Manual	0.401598
358	38 (A)	NLRP3	SYBR	Unknown	30.9908	82.9	Auto Tm	11.3418	20.7848	9.27072	30.2835	30.3883	0.557515	Manual Ct		Manual	17	22	Manual	0.401598
311	39 (G)	NLRP3	SYBR	Unknown	30.0017	82.6	Auto Tm	27.0918	22.459	4.10878	30.2895	30.2269	0.201334	Manual Ct		Manual	17	22	Manual	0.401598
335	39 (G)	NLRP3	SYBR	Unknown	30.3895	82.6	Auto Tm	19.2566	22.459	4.10878	30.2895	30.2269	0.201334	Manual Ct		Manual	17	22	Manual	0.401598
359	39 (G)	NLRP3	SYBR	Unknown	30.2895	82.6	Auto Tm	21.0286	22.459	4.10878	30.2895	30.2269	0.201334	Manual Ct		Manual	17	22	Manual	0.401598
228	4 (12-2)	NLRP3	SYBR	Unknown	28.4404	83.2	Auto Tm	107.08	119.357	10.773	28.276	28.3203	0.105197	Manual Ct		Manual	17	22	Manual	0.401598
252	4 (12-2)	NLRP3	SYBR	Unknown	28.276	83.2	Auto Tm	123.759	119.357	10.773	28.276	28.3203	0.105197	Manual Ct		Manual	17	22	Manual	0.401598
276	4 (12-2)	NLRP3	SYBR	Unknown	28.2446	83.2	Auto Tm	127.232	119.357	10.773	28.276	28.3203	0.105197	Manual Ct		Manual	17	22	Manual	0.401598
312	40 (H)	NLRP3	SYBR	Unknown	28.8949	82.6	Auto Tm	71.7706	66.7871	11.863	28.8949	28.9896	0.213549	Manual Ct		Manual	17	22	Manual	0.401598
336	40 (H)	NLRP3	SYBR	Unknown	28.8397	82.6	Auto Tm	75.3455	66.7871	11.863	28.8949	28.9896	0.213549	Manual Ct		Manual	17	22	Manual	0.401598
360	40 (H)	NLRP3	SYBR	Unknown	29.2341	82.6	Auto Tm	53.2453	66.7871	11.863	28.8949	28.9896	0.213549	Manual Ct		Manual	17	22	Manual	0.401598
229	5 (13-1)	NLRP3	SYBR	Unknown	30.4692	83.2	Auto Tm	17.9507	15.5857	4.27524	30.4692	30.6626	0.346158	Manual Ct		Manual	17	22	Manual	0.401598
253	5 (13-1)	NLRP3	SYBR	Unknown	31.0622	83.2	Auto Tm	10.6505	15.5857	4.27524	30.4692	30.6626	0.346158	Manual Ct		Manual	17	22	Manual	0.401598
277	5 (13-1)	NLRP3	SYBR	Unknown	30.4563	83.2	Auto Tm	18.156	15.5857	4.27524	30.4692	30.6626	0.346158	Manual Ct		Manual	17	22	Manual	0.401598
230	6 (14-1)	NLRP3	SYBR	Unknown	28.7847	83.2	Auto Tm	79.0845	69.299	10.5624	28.9118	28.9438	0.177301	Manual Ct		Manual	17	22	Manual	0.401598
254	6 (14-1)	NLRP3	SYBR	Unknown	28.9118	83.2	Auto Tm	70.7108	69.299	10.5624	28.9118	28.9438	0.177301	Manual Ct		Manual	17	22	Manual	0.401598
278	6 (14-1)	NLRP3	SYBR	Unknown	29.1349	83.2	Auto Tm	58.1017	69.299	10.5624	28.9118	28.9438	0.177301	Manual Ct		Manual	17	22	Manual	0.401598
231	7 (15-1)	NLRP3	SYBR	Unknown	28.735	83.2	Auto Tm	82.6194	71.1503	12.0455	28.8877	28.916	0.196631	Manual Ct		Manual	17	22	Manual	0.401598
255	7 (15-1)	NLRP3	SYBR	Unknown	29.1252	83.2	Auto Tm	58.6012	71.1503	12.0455	28.8877	28.916	0.196631	Manual Ct		Manual	17	22	Manual	0.401598
279	7 (15-1)	NLRP3	SYBR	Unknown	28.8877	83.2	Auto Tm	72.2303	71.1503	12.0455	28.8877	28.916	0.196631	Manual Ct		Manual	17	22	Manual	0.401598
232	8 (15-2)	NLRP3	SYBR	Unknown	29.0096	83.2	Auto Tm	64.8811	62.385	19.0577	29.0096	29.0928	0.370833	Manual Ct		Manual	17	22	Manual	0.401598
256	8 (15-2)	NLRP3	SYBR	Unknown	29.4981	83.2	Auto Tm	42.2023	62.385	19.0577	29.0096	29.0928	0.370833	Manual Ct		Manual	17	22	Manual	0.401598
280	8 (15-2)	NLRP3	SYBR	Unknown	28.7706	83.2	Auto Tm	80.0717	62.385	19.0577	29.0096	29.0928	0.370833	Manual Ct		Manual	17	22	Manual	0.401598
233	9 (16-1)	NLRP3	SYBR	Unknown	29.7899	83.2	Auto Tm	32.6445	30.6797	3.86681	29.7899	29.8667	0.149117	Manual Ct		Manual	17	22	Manual	0.401598
257	9 (16-1)	NLRP3	SYBR	Unknown	30.0386	83.2	Auto Tm	26.225	30.6797	3.86681	29.7899	29.8667	0.149117	Manual Ct		Manual	17	22	Manual	0.401598
281	9 (16-1)	NLRP3	SYBR	Unknown	29.7717	82.9	Auto Tm	33.1696	30.6797	3.86681	29.7899	29.8667	0.149117	Manual Ct		Manual	17	22	Manual	0.401598
377	Gene 3 Standard (1)	NLRP3	SYBR	Standard	33.7902	81.3	Auto Tm	1						Manual Ct		Manual	17	22	Manual	0.401598
375	Gene 3 Standard (10)	NLRP3	SYBR	Standard	31.0524	83.2	Auto Tm	10						Manual Ct		Manual	17	22	Manual	0.401598
373	Gene 3 Standard (100)	NLRP3	SYBR	Standard	28.5588	82.7	Auto Tm	100						Manual Ct		Manual	17	22	Manual	0.401598
381	NTC Gene 3	NLRP3	SYBR	NTC	Undetermined	61.8	Auto Tm	0						Manual Ct		Manual	17	22	Manual	0.401598						TRUE
384	RT Negative 3	NLRP3	SYBR	NTC	Undetermined	61.7	Auto Tm	0						Manual Ct		Manual	17	22	Manual	0.401598						TRUE
Slope	-2.61568	cycles/log decade
Y-Intercept		33.7495
R^2		0.999274
NAP	LPL

## Sheet: 18S
Well	Sample Name	Detector Name	Reporter	Task	Ct	Tm Value	Tm Type	Quantity	Qty Mean	Qty StdDev	Ct Median	Ct Mean	Ct StdDev	Ct Type	Template Name	Baseline Type	Baseline Start	Baseline Stop	Threshold Type	Threshold	FOS	HMD	LME	EW	BPR	NAW	HNS	HRN	EAF	BAF	TAF	CAF
1	1 (11-1)	18S	SYBR	Unknown	9.63127	83.3	Auto Tm	13.8672	16.1897	2.13568	9.38393	9.42882	0.184145	Automatic Ct		Automatic			Automatic	0.886246
25	1 (11-1)	18S	SYBR	Unknown	9.27128	83.3	Auto Tm	18.0691	16.1897	2.13568	9.38393	9.42882	0.184145	Automatic Ct		Automatic			Automatic	0.886246
49	1 (11-1)	18S	SYBR	Unknown	9.38393	83.3	Auto Tm	16.6328	16.1897	2.13568	9.38393	9.42882	0.184145	Automatic Ct		Automatic			Automatic	0.886246
10	10 (17-1)	18S	SYBR	Unknown	9.04365	83.8	Auto Tm	21.3608	21.7315	0.493422	9.03215	9.02049	0.0307153	Automatic Ct		Automatic			Automatic	0.886246
34	10 (17-1)	18S	SYBR	Unknown	8.98564	83.8	Auto Tm	22.2916	21.7315	0.493422	9.03215	9.02049	0.0307153	Automatic Ct		Automatic			Automatic	0.886246
58	10 (17-1)	18S	SYBR	Unknown	9.03215	83.8	Auto Tm	21.5422	21.7315	0.493422	9.03215	9.02049	0.0307153	Automatic Ct		Automatic			Automatic	0.886246
11	11 (17-2)	18S	SYBR	Unknown	9.19777	83.8	Auto Tm	19.0726	20.1731	0.988688	9.10222	9.12257	0.0673702	Automatic Ct		Automatic			Automatic	0.886246
35	11 (17-2)	18S	SYBR	Unknown	9.06772	83.8	Auto Tm	20.9862	20.1731	0.988688	9.10222	9.12257	0.0673702	Automatic Ct		Automatic			Automatic	0.886246
59	11 (17-2)	18S	SYBR	Unknown	9.10222	83.8	Auto Tm	20.4606	20.1731	0.988688	9.10222	9.12257	0.0673702	Automatic Ct		Automatic			Automatic	0.886246
12	12 (18-1)	18S	SYBR	Unknown	9.32189	83.7	Auto Tm	17.4091	18.462	1.48193	9.29013	9.24486	0.107091	Automatic Ct		Automatic			Automatic	0.886246
36	12 (18-1)	18S	SYBR	Unknown	9.29013	83.7	Auto Tm	17.8203	18.462	1.48193	9.29013	9.24486	0.107091	Automatic Ct		Automatic			Automatic	0.886246
60	12 (18-1)	18S	SYBR	Unknown	9.12257	84	Auto Tm	20.1566	18.462	1.48193	9.29013	9.24486	0.107091	Automatic Ct		Automatic			Automatic	0.886246
13	13 (19-1)	18S	SYBR	Unknown	9.4661	83.7	Auto Tm	15.6577	17.4224	1.93751	9.34516	9.32639	0.149973	Automatic Ct		Automatic			Automatic	0.886246
37	13 (19-1)	18S	SYBR	Unknown	9.16792	83.7	Auto Tm	19.4957	17.4224	1.93751	9.34516	9.32639	0.149973	Automatic Ct		Automatic			Automatic	0.886246
61	13 (19-1)	18S	SYBR	Unknown	9.34516	84	Auto Tm	17.1138	17.4224	1.93751	9.34516	9.32639	0.149973	Automatic Ct		Automatic			Automatic	0.886246
14	14 (20-1)	18S	SYBR	Unknown	9.21907	83.7	Auto Tm	18.7761	17.1726	1.64559	9.33409	9.3447	0.13125	Automatic Ct		Automatic			Automatic	0.886246
38	14 (20-1)	18S	SYBR	Unknown	9.48093	83.7	Auto Tm	15.488	17.1726	1.64559	9.33409	9.3447	0.13125	Automatic Ct		Automatic			Automatic	0.886246
62	14 (20-1)	18S	SYBR	Unknown	9.33409	83.7	Auto Tm	17.2536	17.1726	1.64559	9.33409	9.3447	0.13125	Automatic Ct		Automatic			Automatic	0.886246
15	15 (21-1)	18S	SYBR	Unknown	9.03276	83.7	Auto Tm	21.5326	20.5432	1.00666	9.09451	9.09783	0.066791	Automatic Ct		Automatic			Automatic	0.886246
39	15 (21-1)	18S	SYBR	Unknown	9.16622	83.7	Auto Tm	19.5201	20.5432	1.00666	9.09451	9.09783	0.066791	Automatic Ct		Automatic			Automatic	0.886246
63	15 (21-1)	18S	SYBR	Unknown	9.09451	83.7	Auto Tm	20.5769	20.5432	1.00666	9.09451	9.09783	0.066791	Automatic Ct		Automatic			Automatic	0.886246
16	16 (21-2)	18S	SYBR	Unknown	9.04887	83.7	Auto Tm	21.279	21.0915	0.516678	9.04887	9.06118	0.0335185	Automatic Ct		Automatic			Automatic	0.886246
40	16 (21-2)	18S	SYBR	Unknown	9.09911	83.7	Auto Tm	20.5073	21.0915	0.516678	9.04887	9.06118	0.0335185	Automatic Ct		Automatic			Automatic	0.886246
64	16 (21-2)	18S	SYBR	Unknown	9.03556	83.7	Auto Tm	21.4883	21.0915	0.516678	9.04887	9.06118	0.0335185	Automatic Ct		Automatic			Automatic	0.886246
17	17 (22-1)	18S	SYBR	Unknown	9.15862	83.7	Auto Tm	19.6295	20.6215	1.53378	9.14363	9.09401	0.0992181	Automatic Ct		Automatic			Automatic	0.886246
41	17 (22-1)	18S	SYBR	Unknown	8.97977	83.7	Auto Tm	22.3881	20.6215	1.53378	9.14363	9.09401	0.0992181	Automatic Ct		Automatic			Automatic	0.886246
65	17 (22-1)	18S	SYBR	Unknown	9.14363	83.7	Auto Tm	19.847	20.6215	1.53378	9.14363	9.09401	0.0992181	Automatic Ct		Automatic			Automatic	0.886246
18	18 (23-1)	18S	SYBR	Unknown	8.64044	83.7	Auto Tm	28.7321	27.0621	1.46798	8.75152	8.72319	0.0728471	Automatic Ct		Automatic			Automatic	0.886246
42	18 (23-1)	18S	SYBR	Unknown	8.75152	83.7	Auto Tm	26.4788	27.0621	1.46798	8.75152	8.72319	0.0728471	Automatic Ct		Automatic			Automatic	0.886246
66	18 (23-1)	18S	SYBR	Unknown	8.77762	83.7	Auto Tm	25.9755	27.0621	1.46798	8.75152	8.72319	0.0728471	Automatic Ct		Automatic			Automatic	0.886246
19	19 (23-2)	18S	SYBR	Unknown	8.6485	83.7	Auto Tm	28.5623	26.8298	1.83845	8.7237	8.73576	0.093869	Automatic Ct		Automatic			Automatic	0.886246
43	19 (23-2)	18S	SYBR	Unknown	8.83507	83.7	Auto Tm	24.9011	26.8298	1.83845	8.7237	8.73576	0.093869	Automatic Ct		Automatic			Automatic	0.886246
67	19 (23-2)	18S	SYBR	Unknown	8.7237	83.7	Auto Tm	27.0259	26.8298	1.83845	8.7237	8.73576	0.093869	Automatic Ct		Automatic			Automatic	0.886246
2	2 (11-2)	18S	SYBR	Unknown	9.32398	83.3	Auto Tm	17.3824	17.3774	0.802031	9.32398	9.32533	0.0628381	Automatic Ct		Automatic			Automatic	0.886246
26	2 (11-2)	18S	SYBR	Unknown	9.38884	83.3	Auto Tm	16.5729	17.3774	0.802031	9.32398	9.32533	0.0628381	Automatic Ct		Automatic			Automatic	0.886246
50	2 (11-2)	18S	SYBR	Unknown	9.26319	83.3	Auto Tm	18.1769	17.3774	0.802031	9.32398	9.32533	0.0628381	Automatic Ct		Automatic			Automatic	0.886246
20	20 (24-1)	18S	SYBR	Unknown	9.31033	83.7	Auto Tm	17.5577	16.5327	0.892613	9.42703	9.39344	0.0724158	Automatic Ct		Automatic			Automatic	0.886246
44	20 (24-1)	18S	SYBR	Unknown	9.44296	83.7	Auto Tm	15.9264	16.5327	0.892613	9.42703	9.39344	0.0724158	Automatic Ct		Automatic			Automatic	0.886246
68	20 (24-1)	18S	SYBR	Unknown	9.42703	83.7	Auto Tm	16.114	16.5327	0.892613	9.42703	9.39344	0.0724158	Automatic Ct		Automatic			Automatic	0.886246
21	21 (24-2)	18S	SYBR	Unknown	8.98127	83.4	Auto Tm	22.3634	19.9769	2.30661	9.1463	9.14079	0.156832	Automatic Ct		Automatic			Automatic	0.886246
45	21 (24-2)	18S	SYBR	Unknown	9.29479	83.7	Auto Tm	17.7594	19.9769	2.30661	9.1463	9.14079	0.156832	Automatic Ct		Automatic			Automatic	0.886246
69	21 (24-2)	18S	SYBR	Unknown	9.1463	83.4	Auto Tm	19.808	19.9769	2.30661	9.1463	9.14079	0.156832	Automatic Ct		Automatic			Automatic	0.886246
22	22 (25-2)	18S	SYBR	Unknown	8.93314	83.4	Auto Tm	23.1689	21.364	2.88094	8.95012	9.0522	0.191711	Automatic Ct		Automatic			Automatic	0.886246
46	22 (25-2)	18S	SYBR	Unknown	9.27336	83.4	Auto Tm	18.0415	21.364	2.88094	8.95012	9.0522	0.191711	Automatic Ct		Automatic			Automatic	0.886246
70	22 (25-2)	18S	SYBR	Unknown	8.95012	83.4	Auto Tm	22.8815	21.364	2.88094	8.95012	9.0522	0.191711	Automatic Ct		Automatic			Automatic	0.886246
23	23 (26-1)	18S	SYBR	Unknown	9.20599	83.4	Auto Tm	18.9576	18.4871	0.790384	9.20803	9.24101	0.0589026	Automatic Ct		Automatic			Automatic	0.886246
47	23 (26-1)	18S	SYBR	Unknown	9.20803	83.4	Auto Tm	18.9291	18.4871	0.790384	9.20803	9.24101	0.0589026	Automatic Ct		Automatic			Automatic	0.886246
71	23 (26-1)	18S	SYBR	Unknown	9.30902	83.4	Auto Tm	17.5746	18.4871	0.790384	9.20803	9.24101	0.0589026	Automatic Ct		Automatic			Automatic	0.886246
24	24 (26-2)	18S	SYBR	Unknown	8.96121	83.4	Auto Tm	22.6957	23.8143	1.16374	8.90066	8.89685	0.0663462	Automatic Ct		Automatic			Automatic	0.886246
48	24 (26-2)	18S	SYBR	Unknown	8.90066	83.4	Auto Tm	23.7289	23.8143	1.16374	8.90066	8.89685	0.0663462	Automatic Ct		Automatic			Automatic	0.886246
72	24 (26-2)	18S	SYBR	Unknown	8.82868	83.4	Auto Tm	25.0184	23.8143	1.16374	8.90066	8.89685	0.0663462	Automatic Ct		Automatic			Automatic	0.886246
73	25 (27-1)	18S	SYBR	Unknown	8.98256	83.3	Auto Tm	22.3422	22.2552	0.12302	8.98787	8.98787	0.00751832	Automatic Ct		Automatic			Automatic	0.886246
97	25 (27-1)	18S	SYBR	Unknown	8.99319	83.3	Auto Tm	22.1683	22.2552	0.12302	8.98787	8.98787	0.00751832	Automatic Ct		Automatic			Automatic	0.886246
97	25 (27-1)	18S	SYBR	Unknown	8.99319	83.3	Auto Tm	22.1683	22.2552	0.12302	8.98787	8.98787	0.00751832	Automatic Ct		Automatic			Automatic	0.886246
74	26 (27-2)	18S	SYBR	Unknown	8.96789	83.3	Auto Tm	22.5845	22.5366	0.59893	8.96789	8.97109	0.0362131	Automatic Ct		Automatic			Automatic	0.886246
98	26 (27-2)	18S	SYBR	Unknown	9.0088	83.3	Auto Tm	21.9152	22.5366	0.59893	8.96789	8.97109	0.0362131	Automatic Ct		Automatic			Automatic	0.886246
122	26 (27-2)	18S	SYBR	Unknown	8.93659	83.6	Auto Tm	23.1102	22.5366	0.59893	8.96789	8.97109	0.0362131	Automatic Ct		Automatic			Automatic	0.886246
75	27 (27-3)	18S	SYBR	Unknown	8.96901	83.6	Auto Tm	22.5658	22.7935	0.471468	8.96901	8.95555	0.0279754	Automatic Ct		Automatic			Automatic	0.886246
99	27 (27-3)	18S	SYBR	Unknown	8.92339	83.6	Auto Tm	23.3356	22.7935	0.471468	8.96901	8.95555	0.0279754	Automatic Ct		Automatic			Automatic	0.886246
123	27 (27-3)	18S	SYBR	Unknown	8.97425	83.6	Auto Tm	22.4791	22.7935	0.471468	8.96901	8.95555	0.0279754	Automatic Ct		Automatic			Automatic	0.886246
76	28 (28-1)	18S	SYBR	Unknown	8.85434	83.6	Auto Tm	24.5508	23.4873	1.00663	8.92187	8.91541	0.0581018	Automatic Ct		Automatic			Automatic	0.886246
100	28 (28-1)	18S	SYBR	Unknown	8.97001	83.6	Auto Tm	22.5494	23.4873	1.00663	8.92187	8.91541	0.0581018	Automatic Ct		Automatic			Automatic	0.886246
124	28 (28-1)	18S	SYBR	Unknown	8.92187	83.6	Auto Tm	23.3616	23.4873	1.00663	8.92187	8.91541	0.0581018	Automatic Ct		Automatic			Automatic	0.886246
77	29 (28-2)	18S	SYBR	Unknown	9.12457	83.6	Auto Tm	20.1271	20.5837	0.401936	9.08377	9.09423	0.0266907	Automatic Ct		Automatic			Automatic	0.886246
101	29 (28-2)	18S	SYBR	Unknown	9.07436	83.6	Auto Tm	20.884	20.5837	0.401936	9.08377	9.09423	0.0266907	Automatic Ct		Automatic			Automatic	0.886246
125	29 (28-2)	18S	SYBR	Unknown	9.08377	83.6	Auto Tm	20.74	20.5837	0.401936	9.08377	9.09423	0.0266907	Automatic Ct		Automatic			Automatic	0.886246
3	3 (12-1)	18S	SYBR	Unknown	8.83667	83.3	Auto Tm	24.8719	29.3828	4.3537	8.59462	8.62016	0.204942	Automatic Ct		Automatic			Automatic	0.886246
27	3 (12-1)	18S	SYBR	Unknown	8.59462	83.6	Auto Tm	29.7165	29.3828	4.3537	8.59462	8.62016	0.204942	Automatic Ct		Automatic			Automatic	0.886246
51	3 (12-1)	18S	SYBR	Unknown	8.42918	83.6	Auto Tm	33.5601	29.3828	4.3537	8.59462	8.62016	0.204942	Automatic Ct		Automatic			Automatic	0.886246
78	30 (28-3)	18S	SYBR	Unknown	9.24804	83.6	Auto Tm	18.3804	18.557	0.621433	9.24804	9.23554	0.0452664	Automatic Ct		Automatic			Automatic	0.886246
102	30 (28-3)	18S	SYBR	Unknown	9.27324	83.6	Auto Tm	18.0431	18.557	0.621433	9.24804	9.23554	0.0452664	Automatic Ct		Automatic			Automatic	0.886246
126	30 (28-3)	18S	SYBR	Unknown	9.18534	83.8	Auto Tm	19.2477	18.557	0.621433	9.24804	9.23554	0.0452664	Automatic Ct		Automatic			Automatic	0.886246
79	31 (29-1)	18S	SYBR	Unknown	9.31098	83.8	Auto Tm	17.5492	17.5716	1.43402	9.31098	9.31227	0.111171	Automatic Ct		Automatic			Automatic	0.886246
103	31 (29-1)	18S	SYBR	Unknown	9.42408	83.8	Auto Tm	16.1489	17.5716	1.43402	9.31098	9.31227	0.111171	Automatic Ct		Automatic			Automatic	0.886246
127	31 (29-1)	18S	SYBR	Unknown	9.20175	83.8	Auto Tm	19.0167	17.5716	1.43402	9.31098	9.31227	0.111171	Automatic Ct		Automatic			Automatic	0.886246
80	32 (29-2)	18S	SYBR	Unknown	9.18764	83.8	Auto Tm	19.2151	20.2815	0.962765	9.09676	9.11521	0.0651961	Automatic Ct		Automatic			Automatic	0.886246
104	32 (29-2)	18S	SYBR	Unknown	9.06122	83.8	Auto Tm	21.0867	20.2815	0.962765	9.09676	9.11521	0.0651961	Automatic Ct		Automatic			Automatic	0.886246
128	32 (29-2)	18S	SYBR	Unknown	9.09676	83.8	Auto Tm	20.5428	20.2815	0.962765	9.09676	9.11521	0.0651961	Automatic Ct		Automatic			Automatic	0.886246
81	33 (30-1)	18S	SYBR	Unknown	8.60982	83.8	Auto Tm	29.3862	28.5	1.33378	8.6209	8.65248	0.0645301	Automatic Ct		Automatic			Automatic	0.886246
105	33 (30-1)	18S	SYBR	Unknown	8.72672	83.8	Auto Tm	26.9661	28.5	1.33378	8.6209	8.65248	0.0645301	Automatic Ct		Automatic			Automatic	0.886246
129	33 (30-1)	18S	SYBR	Unknown	8.6209	83.8	Auto Tm	29.1479	28.5	1.33378	8.6209	8.65248	0.0645301	Automatic Ct		Automatic			Automatic	0.886246
82	34 (30-2)	18S	SYBR	Unknown	8.97195	83.8	Auto Tm	22.5172	22.8563	0.545357	8.96898	8.95187	0.0322376	Automatic Ct		Automatic			Automatic	0.886246
106	34 (30-2)	18S	SYBR	Unknown	8.96898	83.8	Auto Tm	22.5663	22.8563	0.545357	8.96898	8.95187	0.0322376	Automatic Ct		Automatic			Automatic	0.886246
130	34 (30-2)	18S	SYBR	Unknown	8.91469	83.8	Auto Tm	23.4854	22.8563	0.545357	8.96898	8.95187	0.0322376	Automatic Ct		Automatic			Automatic	0.886246
83	35 (31-1)	18S	SYBR	Unknown	9.1378	84	Auto Tm	19.9322	20.5437	0.539695	9.08342	9.09702	0.035966	Automatic Ct		Automatic			Automatic	0.886246
107	35 (31-1)	18S	SYBR	Unknown	9.08342	83.8	Auto Tm	20.7454	20.5437	0.539695	9.08342	9.09702	0.035966	Automatic Ct		Automatic			Automatic	0.886246
131	35 (31-1)	18S	SYBR	Unknown	9.06984	84	Auto Tm	20.9535	20.5437	0.539695	9.08342	9.09702	0.035966	Automatic Ct		Automatic			Automatic	0.886246
84	36 (31-2)	18S	SYBR	Unknown	9.24182	83.7	Auto Tm	18.4647	18.3761	0.465485	9.24182	9.24865	0.0345816	Automatic Ct		Automatic			Automatic	0.886246
108	36 (31-2)	18S	SYBR	Unknown	9.28614	84	Auto Tm	17.8727	18.3761	0.465485	9.24182	9.24865	0.0345816	Automatic Ct		Automatic			Automatic	0.886246
132	36 (31-2)	18S	SYBR	Unknown	9.218	84	Auto Tm	18.7909	18.3761	0.465485	9.24182	9.24865	0.0345816	Automatic Ct		Automatic			Automatic	0.886246
85	37 (32-1)	18S	SYBR	Unknown	8.79561	84	Auto Tm	25.6343	26.1516	1.4541	8.79561	8.76981	0.0747253	Automatic Ct		Automatic			Automatic	0.886246
109	37 (32-1)	18S	SYBR	Unknown	8.82822	84	Auto Tm	25.027	26.1516	1.4541	8.79561	8.76981	0.0747253	Automatic Ct		Automatic			Automatic	0.886246
133	37 (32-1)	18S	SYBR	Unknown	8.6856	84	Auto Tm	27.7937	26.1516	1.4541	8.79561	8.76981	0.0747253	Automatic Ct		Automatic			Automatic	0.886246
86	38 (A)	18S	SYBR	Unknown	9.26059	84	Auto Tm	18.2116	18.1276	0.524263	9.26059	9.26726	0.0394811	Automatic Ct		Automatic			Automatic	0.886246
110	38 (A)	18S	SYBR	Unknown	9.23154	84	Auto Tm	18.6047	18.1276	0.524263	9.26059	9.26726	0.0394811	Automatic Ct		Automatic			Automatic	0.886246
134	38 (A)	18S	SYBR	Unknown	9.30965	84	Auto Tm	17.5664	18.1276	0.524263	9.26059	9.26726	0.0394811	Automatic Ct		Automatic			Automatic	0.886246
87	39 (G)	18S	SYBR	Unknown	8.56485	83.7	Auto Tm	30.3741	33.7358	5.15008	8.52973	8.43215	0.200204	Automatic Ct		Automatic			Automatic	0.886246
111	39 (G)	18S	SYBR	Unknown	8.52973	83.7	Auto Tm	31.1685	33.7358	5.15008	8.52973	8.43215	0.200204	Automatic Ct		Automatic			Automatic	0.886246
135	39 (G)	18S	SYBR	Unknown	8.20186	84	Auto Tm	39.6649	33.7358	5.15008	8.52973	8.43215	0.200204	Automatic Ct		Automatic			Automatic	0.886246
4	4 (12-2)	18S	SYBR	Unknown	9.25991	83.3	Auto Tm	18.2207	18.8159	0.515598	9.19582	9.21654	0.0375738	Automatic Ct		Automatic			Automatic	0.886246
28	4 (12-2)	18S	SYBR	Unknown	9.19389	83.6	Auto Tm	19.127	18.8159	0.515598	9.19582	9.21654	0.0375738	Automatic Ct		Automatic			Automatic	0.886246
52	4 (12-2)	18S	SYBR	Unknown	9.19582	83.6	Auto Tm	19.0999	18.8159	0.515598	9.19582	9.21654	0.0375738	Automatic Ct		Automatic			Automatic	0.886246
88	40 (H)	18S	SYBR	Unknown	8.98976	84	Auto Tm	22.2242	30.5612	14.8677	8.98976	8.65338	0.609152	Automatic Ct		Automatic			Automatic	0.886246
112	40 (H)	18S	SYBR	Unknown	9.02018	83.7	Auto Tm	21.7327	30.5612	14.8677	8.98976	8.65338	0.609152	Automatic Ct		Automatic			Automatic	0.886246
136	40 (H)	18S	SYBR	Unknown	7.95021	83.7	Auto Tm	47.7266	30.5612	14.8677	8.98976	8.65338	0.609152	Automatic Ct		Automatic			Automatic	0.886246
5	5 (13-1)	18S	SYBR	Unknown	8.47139	83.6	Auto Tm	32.5347	31.6372	2.28604	8.47139	8.51186	0.100233	Automatic Ct		Automatic			Automatic	0.886246
29	5 (13-1)	18S	SYBR	Unknown	8.626	83.6	Auto Tm	29.0386	31.6372	2.28604	8.47139	8.51186	0.100233	Automatic Ct		Automatic			Automatic	0.886246
53	5 (13-1)	18S	SYBR	Unknown	8.4382	83.6	Auto Tm	33.3383	31.6372	2.28604	8.47139	8.51186	0.100233	Automatic Ct		Automatic			Automatic	0.886246
6	6 (14-1)	18S	SYBR	Unknown	9.10725	83.6	Auto Tm	20.385	20.4911	0.799554	9.10725	9.10088	0.0528988	Automatic Ct		Automatic			Automatic	0.886246
30	6 (14-1)	18S	SYBR	Unknown	9.04509	83.6	Auto Tm	21.3384	20.4911	0.799554	9.10725	9.10088	0.0528988	Automatic Ct		Automatic			Automatic	0.886246
54	6 (14-1)	18S	SYBR	Unknown	9.15031	83.6	Auto Tm	19.7498	20.4911	0.799554	9.10725	9.10088	0.0528988	Automatic Ct		Automatic			Automatic	0.886246
7	7 (15-1)	18S	SYBR	Unknown	9.56006	83.5	Auto Tm	14.6126	15.311	1.48087	9.56006	9.50066	0.128441	Automatic Ct		Automatic			Automatic	0.886246
31	7 (15-1)	18S	SYBR	Unknown	9.35328	83.5	Auto Tm	17.0119	15.311	1.48087	9.56006	9.50066	0.128441	Automatic Ct		Automatic			Automatic	0.886246
55	7 (15-1)	18S	SYBR	Unknown	9.58866	83.8	Auto Tm	14.3085	15.311	1.48087	9.56006	9.50066	0.128441	Automatic Ct		Automatic			Automatic	0.886246
8	8 (15-2)	18S	SYBR	Unknown	9.23077	83.8	Auto Tm	18.6153	19.3291	0.629326	9.16289	9.18008	0.0446514	Automatic Ct		Automatic			Automatic	0.886246
32	8 (15-2)	18S	SYBR	Unknown	9.14658	83.8	Auto Tm	19.804	19.3291	0.629326	9.16289	9.18008	0.0446514	Automatic Ct		Automatic			Automatic	0.886246
56	8 (15-2)	18S	SYBR	Unknown	9.16289	83.8	Auto Tm	19.568	19.3291	0.629326	9.16289	9.18008	0.0446514	Automatic Ct		Automatic			Automatic	0.886246
9	9 (16-1)	18S	SYBR	Unknown	9.08601	83.8	Auto Tm	20.7059	19.7214	1.90964	9.08601	9.15669	0.135766	Automatic Ct		Automatic			Automatic	0.886246
33	9 (16-1)	18S	SYBR	Unknown	9.31322	83.8	Auto Tm	17.5204	19.7214	1.90964	9.08601	9.15669	0.135766	Automatic Ct		Automatic			Automatic	0.886246
57	9 (16-1)	18S	SYBR	Unknown	9.07085	83.8	Auto Tm	20.938	19.7214	1.90964	9.08601	9.15669	0.135766	Automatic Ct		Automatic			Automatic	0.886246
365	Gene 1 Standard (1)	18S	SYBR	Standard	13.2794	83	Auto Tm	1						Automatic Ct		Automatic			Automatic	0.886246
366	Gene 1 Standard (1)	18S	SYBR	Standard	13.319	83	Auto Tm	1						Automatic Ct		Automatic			Automatic	0.886246
363	Gene 1 Standard (10)	18S	SYBR	Standard	9.8299	83	Auto Tm	10						Automatic Ct		Automatic			Automatic	0.886246
364	Gene 1 Standard (10)	18S	SYBR	Standard	9.95618	83.3	Auto Tm	10						Automatic Ct		Automatic			Automatic	0.886246
362	Gene 1 Standard (100)	18S	SYBR	Standard	7.12707	83.8	Auto Tm	100						Automatic Ct		Automatic			Automatic	0.886246
379	NTC Gene 1	18S	SYBR	NTC	Undetermined	61.8	Auto Tm	0						Automatic Ct		Automatic			Automatic	0.886246						TRUE
382	RT Negative 1	18S	SYBR	NTC	21.979	83.9	Auto Tm	0.00158232						Automatic Ct		Automatic			Automatic	0.886246
Slope	-3.13179	cycles/log decade
Y-Intercept		13.2077
R^2		0.995438
		18S
	Mouse ID	Qty Mean
1	11-1 (4%+RC+HFHC)	16.1897
2	11-2 (4%+RC+HFHC)	17.3774
3	12-1 (18%+RC+HFHC)	29.3828
4	12-2 (18%+RC+HFHC)	18.8159
5	13-1 (4%+RC+RC)	31.6372
6	14-1 (18%+RC+RC)	20.4911
7	15-1 (4%+RC+HFHC)	15.311
8	15-2 (4%+RC+HFHC)	19.3291
9	16-1 (4%+RC+RC)	19.7214
10	17-1 (18%+RC+HFHC)	21.7315
11	17-2 (18%+RC+HFHC)	20.1731
12	18-1 (18%+RC+RC)	18.462
13	19-1 (4%+RC+HFHC)	17.4224
14	20-1 (4%+RC+RC)	17.1726
15	21-1 (4%+RC+HFHC)	20.5432
16	21-2 (4%+RC+HFHC)	21.0915
17	22-1 (4%+RC+RC)	20.6215
18	23-1 (4%+RC+HFHC)	27.0621
19	23-2 (4%+RC+HFHC)	26.8298
20	24-1 (4%+RC+RC)	16.5327
21	24-2 (4%+RC+RC)	19.9769
22	25-2 (18%+RC+HFHC)	21.364
23	26-1 (18%+RC+RC)	18.4871
24	26-2 (18%+RC+RC)	23.8143
25	27-1 (4%+RC - 5 WEEKS)	22.2552
26	27-2 (4%+RC - 5 WEEKS)	22.5366
27	27-3 (4%+RC - 5 WEEKS)	22.7935
28	28-1 (18%+RC - 4 WEEKS)	23.4873
29	28-2 (18%+RC - 4 WEEKS)	20.5837
30	28-3 (18%+RC - 4 WEEKS)	18.557
31	29-1 (4%- 4 WEEKS)	17.5716
32	29-2 (4%- 4 WEEKS)	20.2815
33	30-1 (18%- 4 WEEKS)	28.5
34	30-2 (18%- 4 WEEKS)	22.8563
35	31-1 (4%- 4 WEEKS)	20.5437
36	31-2 (4%- 4 WEEKS)	18.3761
37	32-1 (18%- 4 WEEKS)	26.1516
38	A (18%+RC+RC)	18.1276
39	G (18%+RC+RC)	33.7358
40	H (18%+RC+RC)	30.5612

## Sheet: IL-1Beta
Well	Sample Name	Detector Name	Reporter	Task	Ct	Tm Value	Tm Type	Quantity	Qty Mean	Qty StdDev	Ct Median	Ct Mean	Ct StdDev	Ct Type	Template Name	Baseline Type	Baseline Start	Baseline Stop	Threshold Type	Threshold	FOS	HMD	LME	EW	BPR	NAW	HNS	HRN	EAF	BAF	TAF	CAF
1	1 (11-1)	IL-1B	SYBR	Unknown	27.9019	79.8	Auto Tm	43.7813	52.6215	7.7383	27.625	27.7024	0.174226	Manual Ct		Manual	15	19	Manual	0.30304
25	1 (11-1)	IL-1B	SYBR	Unknown	27.625	79.8	Auto Tm	55.9149	52.6215	7.7383	27.625	27.7024	0.174226	Manual Ct		Manual	15	19	Manual	0.30304
49	1 (11-1)	IL-1B	SYBR	Unknown	27.5803	80.1	Auto Tm	58.1683	52.6215	7.7383	27.625	27.7024	0.174226	Manual Ct		Manual	15	19	Manual	0.30304
10	10 (17-1)	IL-1B	SYBR	Unknown	26.0464	80.6	Auto Tm	225.511	249.012	28.6056	25.9728	25.939	0.127628	Manual Ct		Manual	15	19	Manual	0.30304
34	10 (17-1)	IL-1B	SYBR	Unknown	25.9728	80.6	Auto Tm	240.661	249.012	28.6056	25.9728	25.939	0.127628	Manual Ct		Manual	15	19	Manual	0.30304
58	10 (17-1)	IL-1B	SYBR	Unknown	25.7979	80.6	Auto Tm	280.864	249.012	28.6056	25.9728	25.939	0.127628	Manual Ct		Manual	15	19	Manual	0.30304
11	11 (17-2)	IL-1B	SYBR	Unknown	25.4851	80.5	Auto Tm	370.267	358.943	13.6315	25.5083	25.5208	0.0433269	Manual Ct		Manual	15	19	Manual	0.30304
35	11 (17-2)	IL-1B	SYBR	Unknown	25.569	80.5	Auto Tm	343.813	358.943	13.6315	25.5083	25.5208	0.0433269	Manual Ct		Manual	15	19	Manual	0.30304
59	11 (17-2)	IL-1B	SYBR	Unknown	25.5083	80.8	Auto Tm	362.749	358.943	13.6315	25.5083	25.5208	0.0433269	Manual Ct		Manual	15	19	Manual	0.30304
12	12 (18-1)	IL-1B	SYBR	Unknown	28.0959	80.5	Auto Tm	36.8839	35.5133	2.75768	28.0959	28.1412	0.0900048	Manual Ct		Manual	15	19	Manual	0.30304
36	12 (18-1)	IL-1B	SYBR	Unknown	28.2448	80.5	Auto Tm	32.3389	35.5133	2.75768	28.0959	28.1412	0.0900048	Manual Ct		Manual	15	19	Manual	0.30304
60	12 (18-1)	IL-1B	SYBR	Unknown	28.0827	80.8	Auto Tm	37.3172	35.5133	2.75768	28.0959	28.1412	0.0900048	Manual Ct		Manual	15	19	Manual	0.30304
13	13 (19-1)	IL-1B	SYBR	Unknown	26.5407	80.5	Auto Tm	145.714	149.757	14.3202	26.5407	26.5131	0.106566	Manual Ct		Manual	15	19	Manual	0.30304
37	13 (19-1)	IL-1B	SYBR	Unknown	26.6032	80.8	Auto Tm	137.893	149.757	14.3202	26.5407	26.5131	0.106566	Manual Ct		Manual	15	19	Manual	0.30304
61	13 (19-1)	IL-1B	SYBR	Unknown	26.3955	80.8	Auto Tm	165.665	149.757	14.3202	26.5407	26.5131	0.106566	Manual Ct		Manual	15	19	Manual	0.30304
14	14 (20-1)	IL-1B	SYBR	Unknown	26.8763	80.5	Auto Tm	108.335	113.056	15.6414	26.8763	26.835	0.153157	Manual Ct		Manual	15	19	Manual	0.30304
38	14 (20-1)	IL-1B	SYBR	Unknown	26.9633	80.5	Auto Tm	100.319	113.056	15.6414	26.8763	26.835	0.153157	Manual Ct		Manual	15	19	Manual	0.30304
62	14 (20-1)	IL-1B	SYBR	Unknown	26.6654	80.8	Auto Tm	130.515	113.056	15.6414	26.8763	26.835	0.153157	Manual Ct		Manual	15	19	Manual	0.30304
15	15 (21-1)	IL-1B	SYBR	Unknown	26.5908	80.5	Auto Tm	139.412	139.29	0.166198	26.5912	26.5918	0.00135102	Manual Ct		Manual	15	19	Manual	0.30304
39	15 (21-1)	IL-1B	SYBR	Unknown	26.5912	80.5	Auto Tm	139.357	139.29	0.166198	26.5912	26.5918	0.00135102	Manual Ct		Manual	15	19	Manual	0.30304
63	15 (21-1)	IL-1B	SYBR	Unknown	26.5933	80.8	Auto Tm	139.101	139.29	0.166198	26.5912	26.5918	0.00135102	Manual Ct		Manual	15	19	Manual	0.30304
16	16 (21-2)	IL-1B	SYBR	Unknown	27.1984	80.5	Auto Tm	81.502	75.7233	9.11809	27.2131	27.2875	0.141699	Manual Ct		Manual	15	19	Manual	0.30304
40	16 (21-2)	IL-1B	SYBR	Unknown	27.4509	80.5	Auto Tm	65.212	75.7233	9.11809	27.2131	27.2875	0.141699	Manual Ct		Manual	15	19	Manual	0.30304
64	16 (21-2)	IL-1B	SYBR	Unknown	27.2131	80.5	Auto Tm	80.4559	75.7233	9.11809	27.2131	27.2875	0.141699	Manual Ct		Manual	15	19	Manual	0.30304
17	17 (22-1)	IL-1B	SYBR	Unknown	28.7296	80.5	Auto Tm	21.0733	20.3651	1.00148	28.769	28.769	0.0556891	Manual Ct		Manual	15	19	Manual	0.30304
41	17 (22-1)	IL-1B	SYBR	Unknown	28.8084	80.5	Auto Tm	19.657	20.3651	1.00148	28.769	28.769	0.0556891	Manual Ct		Manual	15	19	Manual	0.30304
41	17 (22-1)	IL-1B	SYBR	Unknown	28.8084	80.5	Auto Tm	19.657	20.3651	1.00148	28.769	28.769	0.0556891	Manual Ct		Manual	15	19	Manual	0.30304
18	18 (23-1)	IL-1B	SYBR	Unknown	28.0869	80.5	Auto Tm	37.1799	38.6859	1.92883	28.0617	28.0429	0.0558437	Manual Ct		Manual	15	19	Manual	0.30304
42	18 (23-1)	IL-1B	SYBR	Unknown	27.9801	80.5	Auto Tm	40.86	38.6859	1.92883	28.0617	28.0429	0.0558437	Manual Ct		Manual	15	19	Manual	0.30304
66	18 (23-1)	IL-1B	SYBR	Unknown	28.0617	80.5	Auto Tm	38.018	38.6859	1.92883	28.0617	28.0429	0.0558437	Manual Ct		Manual	15	19	Manual	0.30304
19	19 (23-2)	IL-1B	SYBR	Unknown	26.7568	80.5	Auto Tm	120.391	118.139	2.36027	26.7763	26.7784	0.0226482	Manual Ct		Manual	15	19	Manual	0.30304
43	19 (23-2)	IL-1B	SYBR	Unknown	26.7763	80.5	Auto Tm	118.344	118.139	2.36027	26.7763	26.7784	0.0226482	Manual Ct		Manual	15	19	Manual	0.30304
67	19 (23-2)	IL-1B	SYBR	Unknown	26.802	80.5	Auto Tm	115.684	118.139	2.36027	26.7763	26.7784	0.0226482	Manual Ct		Manual	15	19	Manual	0.30304
2	2 (11-2)	IL-1B	SYBR	Unknown	26.7181	80.1	Auto Tm	124.582	114.252	23.712	26.7181	26.834	0.251871	Manual Ct		Manual	15	19	Manual	0.30304
26	2 (11-2)	IL-1B	SYBR	Unknown	27.1229	80.1	Auto Tm	87.1269	114.252	23.712	26.7181	26.834	0.251871	Manual Ct		Manual	15	19	Manual	0.30304
50	2 (11-2)	IL-1B	SYBR	Unknown	26.6608	80.1	Auto Tm	131.046	114.252	23.712	26.7181	26.834	0.251871	Manual Ct		Manual	15	19	Manual	0.30304
44	20 (24-1)	IL-1B	SYBR	Unknown	28.6606	80.4	Auto Tm	22.3972	20.4217	2.79387	28.7705	28.7705	0.155351	Manual Ct		Manual	15	19	Manual	0.30304
68	20 (24-1)	IL-1B	SYBR	Unknown	28.8803	80.4	Auto Tm	18.4461	20.4217	2.79387	28.7705	28.7705	0.155351	Manual Ct		Manual	15	19	Manual	0.30304
68	20 (24-1)	IL-1B	SYBR	Unknown	28.8803	80.4	Auto Tm	18.4461	20.4217	2.79387	28.7705	28.7705	0.155351	Manual Ct		Manual	15	19	Manual	0.30304
21	21 (24-2)	IL-1B	SYBR	Unknown	27.0854	80.2	Auto Tm	90.0602	103.691	14.7619	26.9485	26.9335	0.159998	Manual Ct		Manual	15	19	Manual	0.30304
45	21 (24-2)	IL-1B	SYBR	Unknown	26.7665	80.4	Auto Tm	119.37	103.691	14.7619	26.9485	26.9335	0.159998	Manual Ct		Manual	15	19	Manual	0.30304
69	21 (24-2)	IL-1B	SYBR	Unknown	26.9485	80.4	Auto Tm	101.643	103.691	14.7619	26.9485	26.9335	0.159998	Manual Ct		Manual	15	19	Manual	0.30304
22	22 (25-2)	IL-1B	SYBR	Unknown	27.7508	80.2	Auto Tm	50.0305	50.541	4.00136	27.7508	27.7417	0.0891575	Manual Ct		Manual	15	19	Manual	0.30304
46	22 (25-2)	IL-1B	SYBR	Unknown	27.8259	80.2	Auto Tm	46.8194	50.541	4.00136	27.7508	27.7417	0.0891575	Manual Ct		Manual	15	19	Manual	0.30304
70	22 (25-2)	IL-1B	SYBR	Unknown	27.6483	80.4	Auto Tm	54.7731	50.541	4.00136	27.7508	27.7417	0.0891575	Manual Ct		Manual	15	19	Manual	0.30304
23	23 (26-1)	IL-1B	SYBR	Unknown	27.8803	80.2	Auto Tm	44.6233	39.8865	5.45376	27.9731	28.0147	0.159277	Manual Ct		Manual	15	19	Manual	0.30304
47	23 (26-1)	IL-1B	SYBR	Unknown	28.1906	80.2	Auto Tm	33.9243	39.8865	5.45376	27.9731	28.0147	0.159277	Manual Ct		Manual	15	19	Manual	0.30304
71	23 (26-1)	IL-1B	SYBR	Unknown	27.9731	80.2	Auto Tm	41.112	39.8865	5.45376	27.9731	28.0147	0.159277	Manual Ct		Manual	15	19	Manual	0.30304
24	24 (26-2)	IL-1B	SYBR	Unknown	27.91	80.2	Auto Tm	43.4689	50.8706	8.67812	27.7809	27.7427	0.189287	Manual Ct		Manual	15	19	Manual	0.30304
48	24 (26-2)	IL-1B	SYBR	Unknown	27.7809	80.2	Auto Tm	48.7215	50.8706	8.67812	27.7809	27.7427	0.189287	Manual Ct		Manual	15	19	Manual	0.30304
72	24 (26-2)	IL-1B	SYBR	Unknown	27.5372	80.2	Auto Tm	60.4213	50.8706	8.67812	27.7809	27.7427	0.189287	Manual Ct		Manual	15	19	Manual	0.30304
73	25 (27-1)	IL-1B	SYBR	Unknown	28.7731	80.1	Auto Tm	20.2791	20.5232	0.975932	28.7731	28.7604	0.0534217	Manual Ct		Manual	15	19	Manual	0.30304
97	25 (27-1)	IL-1B	SYBR	Unknown	28.7018	80.1	Auto Tm	21.598	20.5232	0.975932	28.7731	28.7604	0.0534217	Manual Ct		Manual	15	19	Manual	0.30304
121	25 (27-1)	IL-1B	SYBR	Unknown	28.8063	80.4	Auto Tm	19.6925	20.5232	0.975932	28.7731	28.7604	0.0534217	Manual Ct		Manual	15	19	Manual	0.30304
74	26 (27-2)	IL-1B	SYBR	Unknown	28.1735	80.3	Auto Tm	34.4424	34.1042	5.40148	28.1735	28.1943	0.182348	Manual Ct		Manual	15	19	Manual	0.30304
98	26 (27-2)	IL-1B	SYBR	Unknown	28.3862	80.3	Auto Tm	28.5416	34.1042	5.40148	28.1735	28.1943	0.182348	Manual Ct		Manual	15	19	Manual	0.30304
122	26 (27-2)	IL-1B	SYBR	Unknown	28.0233	80.3	Auto Tm	39.3287	34.1042	5.40148	28.1735	28.1943	0.182348	Manual Ct		Manual	15	19	Manual	0.30304
75	27 (27-3)	IL-1B	SYBR	Unknown	28.5598	80.3	Auto Tm	24.4844	24.8627	3.64122	28.5598	28.5505	0.165218	Manual Ct		Manual	15	19	Manual	0.30304
99	27 (27-3)	IL-1B	SYBR	Unknown	28.7108	80.3	Auto Tm	21.4255	24.8627	3.64122	28.5598	28.5505	0.165218	Manual Ct		Manual	15	19	Manual	0.30304
123	27 (27-3)	IL-1B	SYBR	Unknown	28.3808	80.3	Auto Tm	28.6784	24.8627	3.64122	28.5598	28.5505	0.165218	Manual Ct		Manual	15	19	Manual	0.30304
76	28 (28-1)	IL-1B	SYBR	Unknown	28.9277	80.3	Auto Tm	17.6905	16.8859	2.62624	28.9277	28.99	0.183401	Manual Ct		Manual	15	19	Manual	0.30304
100	28 (28-1)	IL-1B	SYBR	Unknown	29.1964	80.3	Auto Tm	13.9515	16.8859	2.62624	28.9277	28.99	0.183401	Manual Ct		Manual	15	19	Manual	0.30304
124	28 (28-1)	IL-1B	SYBR	Unknown	28.8459	80.3	Auto Tm	19.0158	16.8859	2.62624	28.9277	28.99	0.183401	Manual Ct		Manual	15	19	Manual	0.30304
77	29 (28-2)	IL-1B	SYBR	Unknown	28.5682	80.3	Auto Tm	24.3022	26.7224	2.6536	28.4786	28.4644	0.111525	Manual Ct		Manual	15	19	Manual	0.30304
101	29 (28-2)	IL-1B	SYBR	Unknown	28.3465	80.6	Auto Tm	29.5599	26.7224	2.6536	28.4786	28.4644	0.111525	Manual Ct		Manual	15	19	Manual	0.30304
125	29 (28-2)	IL-1B	SYBR	Unknown	28.4786	80.6	Auto Tm	26.305	26.7224	2.6536	28.4786	28.4644	0.111525	Manual Ct		Manual	15	19	Manual	0.30304
3	3 (12-1)	IL-1B	SYBR	Unknown	28.9215	80.1	Auto Tm	17.7864	18.2021	2.18441	28.9215	28.9007	0.134301	Manual Ct		Manual	15	19	Manual	0.30304
27	3 (12-1)	IL-1B	SYBR	Unknown	28.7573	80.1	Auto Tm	20.5645	18.2021	2.18441	28.9215	28.9007	0.134301	Manual Ct		Manual	15	19	Manual	0.30304
51	3 (12-1)	IL-1B	SYBR	Unknown	29.0234	80.3	Auto Tm	16.2554	18.2021	2.18441	28.9215	28.9007	0.134301	Manual Ct		Manual	15	19	Manual	0.30304
78	30 (28-3)	IL-1B	SYBR	Unknown	28.7	80.3	Auto Tm	21.6323	16.8929	4.38143	29.0374	29.0049	0.290027	Manual Ct		Manual	15	19	Manual	0.30304
102	30 (28-3)	IL-1B	SYBR	Unknown	29.0374	80.6	Auto Tm	16.0563	16.8929	4.38143	29.0374	29.0049	0.290027	Manual Ct		Manual	15	19	Manual	0.30304
126	30 (28-3)	IL-1B	SYBR	Unknown	29.2773	80.6	Auto Tm	12.9901	16.8929	4.38143	29.0374	29.0049	0.290027	Manual Ct		Manual	15	19	Manual	0.30304
79	31 (29-1)	IL-1B	SYBR	Unknown	26.3665	80.6	Auto Tm	169.964	160.145	8.66068	26.4572	26.4349	0.0604748	Manual Ct		Manual	15	19	Manual	0.30304
103	31 (29-1)	IL-1B	SYBR	Unknown	26.4572	80.6	Auto Tm	156.879	160.145	8.66068	26.4572	26.4349	0.0604748	Manual Ct		Manual	15	19	Manual	0.30304
127	31 (29-1)	IL-1B	SYBR	Unknown	26.4811	80.6	Auto Tm	153.592	160.145	8.66068	26.4572	26.4349	0.0604748	Manual Ct		Manual	15	19	Manual	0.30304
80	32 (29-2)	IL-1B	SYBR	Unknown	27.8367	80.6	Auto Tm	46.375	50.8452	4.06141	27.7104	27.735	0.0918961	Manual Ct		Manual	15	19	Manual	0.30304
104	32 (29-2)	IL-1B	SYBR	Unknown	27.7104	80.6	Auto Tm	51.8521	50.8452	4.06141	27.7104	27.735	0.0918961	Manual Ct		Manual	15	19	Manual	0.30304
128	32 (29-2)	IL-1B	SYBR	Unknown	27.658	80.6	Auto Tm	54.3084	50.8452	4.06141	27.7104	27.735	0.0918961	Manual Ct		Manual	15	19	Manual	0.30304
81	33 (30-1)	IL-1B	SYBR	Unknown	28.8393	80.6	Auto Tm	19.1263	19.5286	0.414566	28.8171	28.8159	0.0240129	Manual Ct		Manual	15	19	Manual	0.30304
105	33 (30-1)	IL-1B	SYBR	Unknown	28.7914	80.6	Auto Tm	19.9544	19.5286	0.414566	28.8171	28.8159	0.0240129	Manual Ct		Manual	15	19	Manual	0.30304
129	33 (30-1)	IL-1B	SYBR	Unknown	28.8171	80.8	Auto Tm	19.505	19.5286	0.414566	28.8171	28.8159	0.0240129	Manual Ct		Manual	15	19	Manual	0.30304
82	34 (30-2)	IL-1B	SYBR	Unknown	26.6052	80.6	Auto Tm	137.65	150.544	11.2474	26.4661	26.506	0.0864472	Manual Ct		Manual	15	19	Manual	0.30304
106	34 (30-2)	IL-1B	SYBR	Unknown	26.4467	80.8	Auto Tm	158.34	150.544	11.2474	26.4661	26.506	0.0864472	Manual Ct		Manual	15	19	Manual	0.30304
130	34 (30-2)	IL-1B	SYBR	Unknown	26.4661	80.8	Auto Tm	155.641	150.544	11.2474	26.4661	26.506	0.0864472	Manual Ct		Manual	15	19	Manual	0.30304
83	35 (31-1)	IL-1B	SYBR	Unknown	26.6771	80.5	Auto Tm	129.18	137.935	11.368	26.637	26.6054	0.0916968	Manual Ct		Manual	15	19	Manual	0.30304
107	35 (31-1)	IL-1B	SYBR	Unknown	26.637	80.8	Auto Tm	133.841	137.935	11.368	26.637	26.6054	0.0916968	Manual Ct		Manual	15	19	Manual	0.30304
131	35 (31-1)	IL-1B	SYBR	Unknown	26.502	80.8	Auto Tm	150.783	137.935	11.368	26.637	26.6054	0.0916968	Manual Ct		Manual	15	19	Manual	0.30304
84	36 (31-2)	IL-1B	SYBR	Unknown	26.5107	80.8	Auto Tm	149.638	177.32	39.9565	26.4406	26.3366	0.243411	Manual Ct		Manual	15	19	Manual	0.30304
108	36 (31-2)	IL-1B	SYBR	Unknown	26.4406	80.8	Auto Tm	159.195	177.32	39.9565	26.4406	26.3366	0.243411	Manual Ct		Manual	15	19	Manual	0.30304
132	36 (31-2)	IL-1B	SYBR	Unknown	26.0584	80.8	Auto Tm	223.126	177.32	39.9565	26.4406	26.3366	0.243411	Manual Ct		Manual	15	19	Manual	0.30304
85	37 (32-1)	IL-1B	SYBR	Unknown	28.8056	80.8	Auto Tm	19.7047	18.3347	1.44689	28.8784	28.8896	0.0900593	Manual Ct		Manual	15	19	Manual	0.30304
109	37 (32-1)	IL-1B	SYBR	Unknown	28.9847	80.8	Auto Tm	16.8216	18.3347	1.44689	28.8784	28.8896	0.0900593	Manual Ct		Manual	15	19	Manual	0.30304
133	37 (32-1)	IL-1B	SYBR	Unknown	28.8784	80.8	Auto Tm	18.4778	18.3347	1.44689	28.8784	28.8896	0.0900593	Manual Ct		Manual	15	19	Manual	0.30304
86	38 (A)	IL-1B	SYBR	Unknown	29.6174	80.8	Auto Tm	9.61852	9.39532	0.311155	29.6282	29.6444	0.0378276	Manual Ct		Manual	15	19	Manual	0.30304
110	38 (A)	IL-1B	SYBR	Unknown	29.6877	80.8	Auto Tm	9.03989	9.39532	0.311155	29.6282	29.6444	0.0378276	Manual Ct		Manual	15	19	Manual	0.30304
134	38 (A)	IL-1B	SYBR	Unknown	29.6282	80.8	Auto Tm	9.52754	9.39532	0.311155	29.6282	29.6444	0.0378276	Manual Ct		Manual	15	19	Manual	0.30304
87	39 (G)	IL-1B	SYBR	Unknown	29.1225	80.8	Auto Tm	14.8928	12.5539	2.23772	29.3358	29.3279	0.201535	Manual Ct		Manual	15	19	Manual	0.30304
111	39 (G)	IL-1B	SYBR	Unknown	29.3358	80.8	Auto Tm	12.3355	12.5539	2.23772	29.3358	29.3279	0.201535	Manual Ct		Manual	15	19	Manual	0.30304
135	39 (G)	IL-1B	SYBR	Unknown	29.5254	80.8	Auto Tm	10.4334	12.5539	2.23772	29.3358	29.3279	0.201535	Manual Ct		Manual	15	19	Manual	0.30304
4	4 (12-2)	IL-1B	SYBR	Unknown	25.9961	80.1	Auto Tm	235.748	240.305	12.3842	25.9961	25.9754	0.0576716	Manual Ct		Manual	15	19	Manual	0.30304
28	4 (12-2)	IL-1B	SYBR	Unknown	25.9103	80.3	Auto Tm	254.322	240.305	12.3842	25.9961	25.9754	0.0576716	Manual Ct		Manual	15	19	Manual	0.30304
52	4 (12-2)	IL-1B	SYBR	Unknown	26.0199	80.3	Auto Tm	230.845	240.305	12.3842	25.9961	25.9754	0.0576716	Manual Ct		Manual	15	19	Manual	0.30304
88	40 (H)	IL-1B	SYBR	Unknown	27.4826	80.5	Auto Tm	63.4098	67.4788	3.53054	27.3821	27.4132	0.0601619	Manual Ct		Manual	15	19	Manual	0.30304
112	40 (H)	IL-1B	SYBR	Unknown	27.3821	80.8	Auto Tm	69.2953	67.4788	3.53054	27.3821	27.4132	0.0601619	Manual Ct		Manual	15	19	Manual	0.30304
136	40 (H)	IL-1B	SYBR	Unknown	27.375	80.8	Auto Tm	69.7312	67.4788	3.53054	27.3821	27.4132	0.0601619	Manual Ct		Manual	15	19	Manual	0.30304
5	5 (13-1)	IL-1B	SYBR	Unknown	29.6289	80.3	Auto Tm	9.52162	9.99423	0.668363	29.5753	29.5753	0.0757578	Manual Ct		Manual	15	19	Manual	0.30304
53	5 (13-1)	IL-1B	SYBR	Unknown	29.5218	80.3	Auto Tm	10.4668	9.99423	0.668363	29.5753	29.5753	0.0757578	Manual Ct		Manual	15	19	Manual	0.30304
53	5 (13-1)	IL-1B	SYBR	Unknown	29.5218	80.3	Auto Tm	10.4668	9.99423	0.668363	29.5753	29.5753	0.0757578	Manual Ct		Manual	15	19	Manual	0.30304
6	6 (14-1)	IL-1B	SYBR	Unknown	28.4271	80.3	Auto Tm	27.5281	30.4782	2.65147	28.2838	28.3148	0.100455	Manual Ct		Manual	15	19	Manual	0.30304
30	6 (14-1)	IL-1B	SYBR	Unknown	28.2838	80.3	Auto Tm	31.2441	30.4782	2.65147	28.2838	28.3148	0.100455	Manual Ct		Manual	15	19	Manual	0.30304
54	6 (14-1)	IL-1B	SYBR	Unknown	28.2335	80.3	Auto Tm	32.6625	30.4782	2.65147	28.2838	28.3148	0.100455	Manual Ct		Manual	15	19	Manual	0.30304
7	7 (15-1)	IL-1B	SYBR	Unknown	25.582	80.6	Auto Tm	339.871	336.357	3.04305	25.5997	25.5938	0.0102149	Manual Ct		Manual	15	19	Manual	0.30304
31	7 (15-1)	IL-1B	SYBR	Unknown	25.5998	80.6	Auto Tm	334.591	336.357	3.04305	25.5997	25.5938	0.0102149	Manual Ct		Manual	15	19	Manual	0.30304
55	7 (15-1)	IL-1B	SYBR	Unknown	25.5997	80.6	Auto Tm	334.609	336.357	3.04305	25.5997	25.5938	0.0102149	Manual Ct		Manual	15	19	Manual	0.30304
8	8 (15-2)	IL-1B	SYBR	Unknown	27.3499	80.3	Auto Tm	71.2977	72.117	3.23879	27.3499	27.3377	0.0504684	Manual Ct		Manual	15	19	Manual	0.30304
32	8 (15-2)	IL-1B	SYBR	Unknown	27.2822	80.6	Auto Tm	75.6868	72.117	3.23879	27.3499	27.3377	0.0504684	Manual Ct		Manual	15	19	Manual	0.30304
56	8 (15-2)	IL-1B	SYBR	Unknown	27.3809	80.6	Auto Tm	69.3666	72.117	3.23879	27.3499	27.3377	0.0504684	Manual Ct		Manual	15	19	Manual	0.30304
9	9 (16-1)	IL-1B	SYBR	Unknown	29.5231	80.6	Auto Tm	10.4547	11.1078	1.67781	29.5231	29.4627	0.165829	Manual Ct		Manual	15	19	Manual	0.30304
33	9 (16-1)	IL-1B	SYBR	Unknown	29.59	80.6	Auto Tm	9.85472	11.1078	1.67781	29.5231	29.4627	0.165829	Manual Ct		Manual	15	19	Manual	0.30304
57	9 (16-1)	IL-1B	SYBR	Unknown	29.2752	80.6	Auto Tm	13.0139	11.1078	1.67781	29.5231	29.4627	0.165829	Manual Ct		Manual	15	19	Manual	0.30304
365	Gene 1 Standard (1)	IL-1B	SYBR	Standard	32.1461	79.8	Auto Tm	1						Manual Ct		Manual	15	19	Manual	0.30304
363	Gene 1 Standard (10)	IL-1B	SYBR	Standard	29.641	79.8	Auto Tm	10						Manual Ct		Manual	15	19	Manual	0.30304
361	Gene 1 Standard (100)	IL-1B	SYBR	Standard	26.9331	80.6	Auto Tm	100						Manual Ct		Manual	15	19	Manual	0.30304
379	NTC Gene 1	IL-1B	SYBR	NTC	34.0789	74.9	Auto Tm	0.186822						Manual Ct		Manual	15	19	Manual	0.30304
382	RT Negative 1	IL-1B	SYBR	NTC	Undetermined	61.8	Auto Tm	0						Manual Ct		Manual	15	19	Manual	0.30304						TRUE
Slope	-2.60649	cycles/log decade
Y-Intercept		32.1799
R^2		0.999496
Slope	-2.73047	cycles/log decade
Y-Intercept		30.8767
R^2		0.991676
		IL-1Beta	18S
	Mouse ID	Qty Mean	Qty Mean	Ratio	Normalized values	Mice groups										Mean	STDEV	SE
1	11-1 (4%+RC+HFHC)	52.6215	16.1897	3.25031	0.749689	18%- 4 WEEKS	0.158045	1.51919	0.161708							0.612983	0.784805	0.453107
2	11-2 (4%+RC+HFHC)	114.252	17.3774	6.57473	1.51647	4%- 4 WEEKS	2.10212	0.578237	1.54864	2.22566						1.61367	0.750438	0.375219	P = 0.147
3	12-1 (18%+RC+HFHC)	18.2021	29.3828	0.61948	0.142884
4	12-2 (18%+RC+HFHC)	240.305	18.8159	12.7714	2.94575	18%+RC - 4 WEEKS	0.165824	0.299439	0.209967							0.225077	0.0680765	0.039304
5	13-1 (4%+RC+RC)	9.99423	31.6372	0.315901	0.072863	4%+RC - 4 WEEKS	0.212701	0.34904	0.25159							0.27111	0.0702344	0.0405499	P = 0.461
6	14-1 (18%+RC+RC)	30.4782	20.4911	1.48739	0.343069
7	15-1 (4%+RC+HFHC)	336.357	15.311	21.9683	5.06702	18%+RC+RC	0.343069	0.443678	0.497638	0.492702	0.119544	0.0858309	0.509276			0.355963	0.182117	0.0688338
8	15-2 (4%+RC+HFHC)	72.117	19.3291	3.73101	0.860564	18%+RC+HFHC	=F138	2.94575	2.64294	4.10401	0.545654					2.55959	1.48293	0.663186	P = 0.006	**
9	16-1 (4%+RC+RC)	11.1078	19.7214	0.563234	0.129911
10	17-1 (18%+RC+HFHC)	249.012	21.7315	11.4586	2.64294	4%+RC+RC	0.072863	0.129911	1.5185	0.227784	0.284908	1.19721				0.571863	0.621649	0.253787
11	17-2 (18%+RC+HFHC)	358.943	20.1731	17.7931	4.10401	4%+RC+HFHC	0.749689	1.51647	=F142	0.860564	1.98261	1.5639	0.82809	0.329722	1.01563	1.10583	0.537428	0.179143	P = 0.111
12	18-1 (18%+RC+RC)	35.5133	18.462	1.92359	0.443678
13	19-1 (4%+RC+HFHC)	149.757	17.4224	8.59569	1.98261											Mean		SE
14	20-1 (4%+RC+RC)	113.056	17.1726	6.58355	1.5185											0.612983	1	0.453107	0.739185
15	21-1 (4%+RC+HFHC)	139.29	20.5432	6.78035	1.5639											1.61367	2.63248	0.375219	0.61212
16	21-2 (4%+RC+HFHC)	75.7233	21.0915	3.59022	0.82809
17	22-1 (4%+RC+RC)	20.3651	20.6215	0.987566	0.227784											0.225077	0.367183	0.039304	0.0641193
18	23-1 (4%+RC+HFHC)	38.6859	27.0621	1.42952	0.329722											0.27111	0.442281	0.0405499	0.0661518
19	23-2 (4%+RC+HFHC)	118.139	26.8298	4.4033	1.01563
20	24-1 (4%+RC+RC)	20.4217	16.5327	1.23523	0.284908											0.355963	0.580706	0.0688338	0.112293
21	24-2 (4%+RC+RC)	103.691	19.9769	5.19054	1.19721											2.55959	4.17563	0.663186	1.0819
22	25-2 (18%+RC+HFHC)	50.541	21.364	2.36571	0.545654
23	26-1 (18%+RC+RC)	39.8865	18.4871	2.15753	0.497638											0.571863	0.932918	0.253787	0.41402
24	26-2 (18%+RC+RC)	50.8706	23.8143	2.13613	0.492702											1.10583	1.80402	0.179143	0.292248
25	27-1 (4%+RC - 5 WEEKS)	20.5232	22.2552	0.922174	0.212701
26	27-2 (4%+RC - 5 WEEKS)	34.1042	22.5366	1.51328	0.34904
27	27-3 (4%+RC - 5 WEEKS)	24.8627	22.7935	1.09078	0.25159
28	28-1 (18%+RC - 4 WEEKS)	16.8859	23.4873	0.718939	0.165824
29	28-2 (18%+RC - 4 WEEKS)	26.7224	20.5837	1.29823	0.299439
30	28-3 (18%+RC - 4 WEEKS)	16.8929	18.557	0.910323	0.209967
31	29-1 (4%- 4 WEEKS)	160.145	17.5716	9.11383	2.10212		0.158045	2.10212		0.165824	0.212701		0.343069	=F138		0.072863	0.749689
32	29-2 (4%- 4 WEEKS)	50.8452	20.2815	2.50697	0.578237		1.51919	0.578237		0.299439	0.34904		0.443678	2.94575		0.129911	1.51647
33	30-1 (18%- 4 WEEKS)	19.5286	28.5	0.685212	0.158045		0.161708	1.54864		0.209967	0.25159		0.497638	2.64294		1.5185	=F142
34	30-2 (18%- 4 WEEKS)	150.544	22.8563	6.58654	1.51919			2.22566					0.492702	4.10401		0.227784	0.860564
35	31-1 (4%- 4 WEEKS)	137.935	20.5437	6.71421	1.54864								0.119544	0.545654		0.284908	1.98261
36	31-2 (4%- 4 WEEKS)	177.32	18.3761	9.64947	2.22566								0.0858309			1.19721	1.5639
37	32-1 (18%- 4 WEEKS)	18.3347	26.1516	0.701092	0.161708								0.509276				0.82809
38	A (18%+RC+RC)	9.39532	18.1276	0.518288	0.119544												0.329722
39	G (18%+RC+RC)	12.5539	33.7358	0.372124	0.0858309												1.01563
40	H (18%+RC+RC)	67.4788	30.5612	2.20799	0.509276
				4.33554

## Sheet: MCP1
Well	Sample Name	Detector Name	Reporter	Task	Ct	Tm Value	Tm Type	Quantity	Qty Mean	Qty StdDev	Ct Median	Ct Mean	Ct StdDev	Ct Type	Template Name	Baseline Type	Baseline Start	Baseline Stop	Threshold Type	Threshold	FOS	HMD	LME	EW	BPR	NAW	HNS	HRN	EAF	BAF	TAF	CAF
89	1 (11-1)	MCP-1	SYBR	Unknown	29.6522	85.8	Auto Tm	60.2619	56.8944	8.5861	29.6522	29.7472	0.228661	Manual Ct		Manual	15	21	Manual	0.29434
113	1 (11-1)	MCP-1	SYBR	Unknown	29.5813	85.8	Auto Tm	63.2862	56.8944	8.5861	29.6522	29.7472	0.228661	Manual Ct		Manual	15	21	Manual	0.29434
137	1 (11-1)	MCP-1	SYBR	Unknown	30.008	85.8	Auto Tm	47.135	56.8944	8.5861	29.6522	29.7472	0.228661	Manual Ct		Manual	15	21	Manual	0.29434
146	10 (17-1)	MCP-1	SYBR	Unknown	27.7737	85.7	Auto Tm	220.484	222.271	2.55216	27.7694	27.7621	0.0165784	Manual Ct		Manual	15	21	Manual	0.29434
170	10 (17-1)	MCP-1	SYBR	Unknown	27.7694	85.7	Auto Tm	221.136	222.271	2.55216	27.7694	27.7621	0.0165784	Manual Ct		Manual	15	21	Manual	0.29434
194	10 (17-1)	MCP-1	SYBR	Unknown	27.7431	85.7	Auto Tm	225.194	222.271	2.55216	27.7694	27.7621	0.0165784	Manual Ct		Manual	15	21	Manual	0.29434
147	11 (17-2)	MCP-1	SYBR	Unknown	25.4484	85.7	Auto Tm	1098.26	1037.97	60.9689	25.5283	25.5318	0.0852582	Manual Ct		Manual	15	21	Manual	0.29434
171	11 (17-2)	MCP-1	SYBR	Unknown	25.5283	85.7	Auto Tm	1039.31	1037.97	60.9689	25.5283	25.5318	0.0852582	Manual Ct		Manual	15	21	Manual	0.29434
195	11 (17-2)	MCP-1	SYBR	Unknown	25.6188	85.7	Auto Tm	976.344	1037.97	60.9689	25.5283	25.5318	0.0852582	Manual Ct		Manual	15	21	Manual	0.29434
148	12 (18-1)	MCP-1	SYBR	Unknown	30.1892	85.7	Auto Tm	41.5914	46.4808	4.50365	30.0002	30.0329	0.142797	Manual Ct		Manual	15	21	Manual	0.29434
172	12 (18-1)	MCP-1	SYBR	Unknown	29.9093	85.7	Auto Tm	50.4595	46.4808	4.50365	30.0002	30.0329	0.142797	Manual Ct		Manual	15	21	Manual	0.29434
196	12 (18-1)	MCP-1	SYBR	Unknown	30.0002	85.7	Auto Tm	47.3914	46.4808	4.50365	30.0002	30.0329	0.142797	Manual Ct		Manual	15	21	Manual	0.29434
149	13 (19-1)	MCP-1	SYBR	Unknown	28.3534	85.7	Auto Tm	147.757	144.835	8.18256	28.3534	28.3839	0.0829917	Manual Ct		Manual	15	21	Manual	0.29434
173	13 (19-1)	MCP-1	SYBR	Unknown	28.4778	85.7	Auto Tm	135.592	144.835	8.18256	28.3534	28.3839	0.0829917	Manual Ct		Manual	15	21	Manual	0.29434
197	13 (19-1)	MCP-1	SYBR	Unknown	28.3204	85.7	Auto Tm	151.155	144.835	8.18256	28.3534	28.3839	0.0829917	Manual Ct		Manual	15	21	Manual	0.29434
150	14 (20-1)	MCP-1	SYBR	Unknown	29.6227	85.7	Auto Tm	61.5036	52.0863	10.365	29.8172	29.8835	0.299538	Manual Ct		Manual	15	21	Manual	0.29434
174	14 (20-1)	MCP-1	SYBR	Unknown	30.2106	85.7	Auto Tm	40.9809	52.0863	10.365	29.8172	29.8835	0.299538	Manual Ct		Manual	15	21	Manual	0.29434
198	14 (20-1)	MCP-1	SYBR	Unknown	29.8172	85.7	Auto Tm	53.7744	52.0863	10.365	29.8172	29.8835	0.299538	Manual Ct		Manual	15	21	Manual	0.29434
151	15 (21-1)	MCP-1	SYBR	Unknown	29.0982	85.7	Auto Tm	88.3459	72.2004	20.5209	29.2574	29.4348	0.452111	Manual Ct		Manual	15	21	Manual	0.29434
175	15 (21-1)	MCP-1	SYBR	Unknown	29.2574	85.7	Auto Tm	79.1478	72.2004	20.5209	29.2574	29.4348	0.452111	Manual Ct		Manual	15	21	Manual	0.29434
199	15 (21-1)	MCP-1	SYBR	Unknown	29.9486	86	Auto Tm	49.1076	72.2004	20.5209	29.2574	29.4348	0.452111	Manual Ct		Manual	15	21	Manual	0.29434
152	16 (21-2)	MCP-1	SYBR	Unknown	28.8716	86	Auto Tm	103.306	96.5457	5.93742	29.0059	28.9714	0.0877889	Manual Ct		Manual	15	21	Manual	0.29434
176	16 (21-2)	MCP-1	SYBR	Unknown	29.0367	86	Auto Tm	92.1754	96.5457	5.93742	29.0059	28.9714	0.0877889	Manual Ct		Manual	15	21	Manual	0.29434
200	16 (21-2)	MCP-1	SYBR	Unknown	29.0059	86	Auto Tm	94.1562	96.5457	5.93742	29.0059	28.9714	0.0877889	Manual Ct		Manual	15	21	Manual	0.29434
153	17 (22-1)	MCP-1	SYBR	Unknown	30.8023	85.9	Auto Tm	27.2358	25.1018	2.92999	30.8525	30.9274	0.174956	Manual Ct		Manual	15	21	Manual	0.29434
177	17 (22-1)	MCP-1	SYBR	Unknown	30.8525	85.9	Auto Tm	26.3084	25.1018	2.92999	30.8525	30.9274	0.174956	Manual Ct		Manual	15	21	Manual	0.29434
201	17 (22-1)	MCP-1	SYBR	Unknown	31.1273	85.9	Auto Tm	21.7612	25.1018	2.92999	30.8525	30.9274	0.174956	Manual Ct		Manual	15	21	Manual	0.29434
154	18 (23-1)	MCP-1	SYBR	Unknown	30.7906	85.9	Auto Tm	27.4568	27.7038	4.67834	30.7906	30.7915	0.245547	Manual Ct		Manual	15	21	Manual	0.29434
178	18 (23-1)	MCP-1	SYBR	Unknown	31.0375	85.9	Auto Tm	23.1538	27.7038	4.67834	30.7906	30.7915	0.245547	Manual Ct		Manual	15	21	Manual	0.29434
202	18 (23-1)	MCP-1	SYBR	Unknown	30.5464	85.9	Auto Tm	32.5007	27.7038	4.67834	30.7906	30.7915	0.245547	Manual Ct		Manual	15	21	Manual	0.29434
155	19 (23-2)	MCP-1	SYBR	Unknown	28.8975	85.9	Auto Tm	101.476	89.3533	10.4989	29.1831	29.0882	0.165116	Manual Ct		Manual	15	21	Manual	0.29434
179	19 (23-2)	MCP-1	SYBR	Unknown	29.1831	85.9	Auto Tm	83.3159	89.3533	10.4989	29.1831	29.0882	0.165116	Manual Ct		Manual	15	21	Manual	0.29434
203	19 (23-2)	MCP-1	SYBR	Unknown	29.1839	85.9	Auto Tm	83.2676	89.3533	10.4989	29.1831	29.0882	0.165116	Manual Ct		Manual	15	21	Manual	0.29434
90	2 (11-2)	MCP-1	SYBR	Unknown	27.7558	85.8	Auto Tm	223.225	233.459	9.44262	27.6794	27.6917	0.0589471	Manual Ct		Manual	15	21	Manual	0.29434
114	2 (11-2)	MCP-1	SYBR	Unknown	27.6794	85.8	Auto Tm	235.319	233.459	9.44262	27.6794	27.6917	0.0589471	Manual Ct		Manual	15	21	Manual	0.29434
138	2 (11-2)	MCP-1	SYBR	Unknown	27.6399	85.8	Auto Tm	241.833	233.459	9.44262	27.6794	27.6917	0.0589471	Manual Ct		Manual	15	21	Manual	0.29434
156	20 (24-1)	MCP-1	SYBR	Unknown	31.2324	85.9	Auto Tm	20.238	21.5603	5.43577	31.2324	31.1706	0.357184	Manual Ct		Manual	15	21	Manual	0.29434
180	20 (24-1)	MCP-1	SYBR	Unknown	30.7865	85.9	Auto Tm	27.5352	21.5603	5.43577	31.2324	31.1706	0.357184	Manual Ct		Manual	15	21	Manual	0.29434
204	20 (24-1)	MCP-1	SYBR	Unknown	31.4928	85.9	Auto Tm	16.9077	21.5603	5.43577	31.2324	31.1706	0.357184	Manual Ct		Manual	15	21	Manual	0.29434
157	21 (24-2)	MCP-1	SYBR	Unknown	29.4999	85.9	Auto Tm	66.9469	80.18	18.0793	29.3782	29.2619	0.312857	Manual Ct		Manual	15	21	Manual	0.29434
181	21 (24-2)	MCP-1	SYBR	Unknown	29.3782	85.9	Auto Tm	72.8136	80.18	18.0793	29.3782	29.2619	0.312857	Manual Ct		Manual	15	21	Manual	0.29434
205	21 (24-2)	MCP-1	SYBR	Unknown	28.9075	85.9	Auto Tm	100.78	80.18	18.0793	29.3782	29.2619	0.312857	Manual Ct		Manual	15	21	Manual	0.29434
158	22 (25-2)	MCP-1	SYBR	Unknown	27.9737	85.9	Auto Tm	192.049	173.769	17.7713	28.1274	28.1236	0.148008	Manual Ct		Manual	15	21	Manual	0.29434
182	22 (25-2)	MCP-1	SYBR	Unknown	28.2696	85.9	Auto Tm	156.554	173.769	17.7713	28.1274	28.1236	0.148008	Manual Ct		Manual	15	21	Manual	0.29434
206	22 (25-2)	MCP-1	SYBR	Unknown	28.1274	85.9	Auto Tm	172.706	173.769	17.7713	28.1274	28.1236	0.148008	Manual Ct		Manual	15	21	Manual	0.29434
159	23 (26-1)	MCP-1	SYBR	Unknown	30.6478	85.9	Auto Tm	30.3034	38.4617	7.73866	30.2682	30.3229	0.301214	Manual Ct		Manual	15	21	Manual	0.29434
183	23 (26-1)	MCP-1	SYBR	Unknown	30.0529	85.9	Auto Tm	45.6982	38.4617	7.73866	30.2682	30.3229	0.301214	Manual Ct		Manual	15	21	Manual	0.29434
207	23 (26-1)	MCP-1	SYBR	Unknown	30.2682	85.9	Auto Tm	39.3836	38.4617	7.73866	30.2682	30.3229	0.301214	Manual Ct		Manual	15	21	Manual	0.29434
160	24 (26-2)	MCP-1	SYBR	Unknown	31.4445	85.8	Auto Tm	17.4816	15.2093	1.99026	31.7282	31.6541	0.184094	Manual Ct		Manual	15	21	Manual	0.29434
184	24 (26-2)	MCP-1	SYBR	Unknown	31.7282	85.8	Auto Tm	14.3711	15.2093	1.99026	31.7282	31.6541	0.184094	Manual Ct		Manual	15	21	Manual	0.29434
208	24 (26-2)	MCP-1	SYBR	Unknown	31.7895	85.8	Auto Tm	13.7753	15.2093	1.99026	31.7282	31.6541	0.184094	Manual Ct		Manual	15	21	Manual	0.29434
161	25 (27-1)	MCP-1	SYBR	Unknown	30.6656	85.8	Auto Tm	29.9324	28.3092	3.7267	30.6656	30.7552	0.198523	Manual Ct		Manual	15	21	Manual	0.29434
185	25 (27-1)	MCP-1	SYBR	Unknown	30.9827	85.8	Auto Tm	24.0462	28.3092	3.7267	30.6656	30.7552	0.198523	Manual Ct		Manual	15	21	Manual	0.29434
209	25 (27-1)	MCP-1	SYBR	Unknown	30.6172	85.8	Auto Tm	30.949	28.3092	3.7267	30.6656	30.7552	0.198523	Manual Ct		Manual	15	21	Manual	0.29434
162	26 (27-2)	MCP-1	SYBR	Unknown	30.3875	85.8	Auto Tm	36.2699	35.7045	3.24887	30.3875	30.4143	0.133708	Manual Ct		Manual	15	21	Manual	0.29434
186	26 (27-2)	MCP-1	SYBR	Unknown	30.5594	85.8	Auto Tm	32.21	35.7045	3.24887	30.3875	30.4143	0.133708	Manual Ct		Manual	15	21	Manual	0.29434
210	26 (27-2)	MCP-1	SYBR	Unknown	30.2961	85.8	Auto Tm	38.6335	35.7045	3.24887	30.3875	30.4143	0.133708	Manual Ct		Manual	15	21	Manual	0.29434
163	27 (27-3)	MCP-1	SYBR	Unknown	30.6533	85.8	Auto Tm	30.1885	24.431	5.31801	31.0221	30.9822	0.310893	Manual Ct		Manual	15	21	Manual	0.29434
187	27 (27-3)	MCP-1	SYBR	Unknown	31.2712	85.8	Auto Tm	19.703	24.431	5.31801	31.0221	30.9822	0.310893	Manual Ct		Manual	15	21	Manual	0.29434
211	27 (27-3)	MCP-1	SYBR	Unknown	31.0221	85.8	Auto Tm	23.4014	24.431	5.31801	31.0221	30.9822	0.310893	Manual Ct		Manual	15	21	Manual	0.29434
164	28 (28-1)	MCP-1	SYBR	Unknown	30.8136	85.8	Auto Tm	27.0246	25.7853	3.29762	30.8136	30.8899	0.192079	Manual Ct		Manual	15	21	Manual	0.29434
188	28 (28-1)	MCP-1	SYBR	Unknown	30.7477	85.8	Auto Tm	28.2836	25.7853	3.29762	30.8136	30.8899	0.192079	Manual Ct		Manual	15	21	Manual	0.29434
212	28 (28-1)	MCP-1	SYBR	Unknown	31.1084	85.8	Auto Tm	22.0475	25.7853	3.29762	30.8136	30.8899	0.192079	Manual Ct		Manual	15	21	Manual	0.29434
165	29 (28-2)	MCP-1	SYBR	Unknown	31.0971	85.6	Auto Tm	22.2195	23.5138	3.17955	31.0971	31.0236	0.190222	Manual Ct		Manual	15	21	Manual	0.29434
189	29 (28-2)	MCP-1	SYBR	Unknown	30.8076	85.6	Auto Tm	27.1364	23.5138	3.17955	31.0971	31.0236	0.190222	Manual Ct		Manual	15	21	Manual	0.29434
213	29 (28-2)	MCP-1	SYBR	Unknown	31.1662	85.6	Auto Tm	21.1855	23.5138	3.17955	31.0971	31.0236	0.190222	Manual Ct		Manual	15	21	Manual	0.29434
91	3 (12-1)	MCP-1	SYBR	Unknown	30.4182	85.6	Auto Tm	35.5098	39.1862	5.27604	30.3658	30.2839	0.189035	Manual Ct		Manual	15	21	Manual	0.29434
115	3 (12-1)	MCP-1	SYBR	Unknown	30.0677	85.8	Auto Tm	45.2315	39.1862	5.27604	30.3658	30.2839	0.189035	Manual Ct		Manual	15	21	Manual	0.29434
139	3 (12-1)	MCP-1	SYBR	Unknown	30.3658	85.8	Auto Tm	36.8174	39.1862	5.27604	30.3658	30.2839	0.189035	Manual Ct		Manual	15	21	Manual	0.29434
166	30 (28-3)	MCP-1	SYBR	Unknown	30.9034	85.5	Auto Tm	25.3992	22.9102	2.18477	31.1101	31.0571	0.13516	Manual Ct		Manual	15	21	Manual	0.29434
190	30 (28-3)	MCP-1	SYBR	Unknown	31.1577	85.5	Auto Tm	21.3095	22.9102	2.18477	31.1101	31.0571	0.13516	Manual Ct		Manual	15	21	Manual	0.29434
214	30 (28-3)	MCP-1	SYBR	Unknown	31.1101	85.5	Auto Tm	22.022	22.9102	2.18477	31.1101	31.0571	0.13516	Manual Ct		Manual	15	21	Manual	0.29434
167	31 (29-1)	MCP-1	SYBR	Unknown	26.8192	85.5	Auto Tm	426.208	418.676	38.4648	26.8192	26.8492	0.135201	Manual Ct		Manual	15	21	Manual	0.29434
191	31 (29-1)	MCP-1	SYBR	Unknown	26.9968	85.5	Auto Tm	377.003	418.676	38.4648	26.8192	26.8492	0.135201	Manual Ct		Manual	15	21	Manual	0.29434
215	31 (29-1)	MCP-1	SYBR	Unknown	26.7315	85.5	Auto Tm	452.818	418.676	38.4648	26.8192	26.8492	0.135201	Manual Ct		Manual	15	21	Manual	0.29434
168	32 (29-2)	MCP-1	SYBR	Unknown	28.2521	85.5	Auto Tm	158.454	138.53	20.4848	28.4355	28.4575	0.217196	Manual Ct		Manual	15	21	Manual	0.29434
192	32 (29-2)	MCP-1	SYBR	Unknown	28.4355	85.5	Auto Tm	139.61	138.53	20.4848	28.4355	28.4575	0.217196	Manual Ct		Manual	15	21	Manual	0.29434
216	32 (29-2)	MCP-1	SYBR	Unknown	28.6849	85.5	Auto Tm	117.527	138.53	20.4848	28.4355	28.4575	0.217196	Manual Ct		Manual	15	21	Manual	0.29434
217	33 (30-1)	MCP-1	SYBR	Unknown	30.1503	85.5	Auto Tm	42.7233	42.3145	11.0284	30.1503	30.1986	0.390354	Manual Ct		Manual	15	21	Manual	0.29434
241	33 (30-1)	MCP-1	SYBR	Unknown	29.8346	85.5	Auto Tm	53.1328	42.3145	11.0284	30.1503	30.1986	0.390354	Manual Ct		Manual	15	21	Manual	0.29434
265	33 (30-1)	MCP-1	SYBR	Unknown	30.6108	85.5	Auto Tm	31.0874	42.3145	11.0284	30.1503	30.1986	0.390354	Manual Ct		Manual	15	21	Manual	0.29434
218	34 (30-2)	MCP-1	SYBR	Unknown	26.8177	85.7	Auto Tm	426.652	421.899	34.8454	26.8177	26.8372	0.120911	Manual Ct		Manual	15	21	Manual	0.29434
242	34 (30-2)	MCP-1	SYBR	Unknown	26.9667	85.4	Auto Tm	384.921	421.899	34.8454	26.8177	26.8372	0.120911	Manual Ct		Manual	15	21	Manual	0.29434
266	34 (30-2)	MCP-1	SYBR	Unknown	26.7273	85.4	Auto Tm	454.123	421.899	34.8454	26.8177	26.8372	0.120911	Manual Ct		Manual	15	21	Manual	0.29434
219	35 (31-1)	MCP-1	SYBR	Unknown	28.1905	85.7	Auto Tm	165.347	181.59	14.7527	28.0258	28.058	0.11962	Manual Ct		Manual	15	21	Manual	0.29434
243	35 (31-1)	MCP-1	SYBR	Unknown	27.9579	85.7	Auto Tm	194.157	181.59	14.7527	28.0258	28.058	0.11962	Manual Ct		Manual	15	21	Manual	0.29434
267	35 (31-1)	MCP-1	SYBR	Unknown	28.0258	85.7	Auto Tm	185.265	181.59	14.7527	28.0258	28.058	0.11962	Manual Ct		Manual	15	21	Manual	0.29434
220	36 (31-2)	MCP-1	SYBR	Unknown	28.808	85.7	Auto Tm	107.948	120.212	12.5932	28.6598	28.6574	0.151736	Manual Ct		Manual	15	21	Manual	0.29434
244	36 (31-2)	MCP-1	SYBR	Unknown	28.6598	85.7	Auto Tm	119.579	120.212	12.5932	28.6598	28.6574	0.151736	Manual Ct		Manual	15	21	Manual	0.29434
268	36 (31-2)	MCP-1	SYBR	Unknown	28.5045	85.7	Auto Tm	133.11	120.212	12.5932	28.6598	28.6574	0.151736	Manual Ct		Manual	15	21	Manual	0.29434
221	37 (32-1)	MCP-1	SYBR	Unknown	31.3305	85.7	Auto Tm	18.9125	18.6428	1.39138	31.3305	31.3541	0.109439	Manual Ct		Manual	15	21	Manual	0.29434
245	37 (32-1)	MCP-1	SYBR	Unknown	31.2583	85.7	Auto Tm	19.8797	18.6428	1.39138	31.3305	31.3541	0.109439	Manual Ct		Manual	15	21	Manual	0.29434
269	37 (32-1)	MCP-1	SYBR	Unknown	31.4733	85.7	Auto Tm	17.1364	18.6428	1.39138	31.3305	31.3541	0.109439	Manual Ct		Manual	15	21	Manual	0.29434
222	38 (A)	MCP-1	SYBR	Unknown	31.1034	85.7	Auto Tm	22.1241	19.5522	4.09615	31.1311	31.3058	0.32682	Manual Ct		Manual	15	21	Manual	0.29434
246	38 (A)	MCP-1	SYBR	Unknown	31.1311	85.7	Auto Tm	21.704	19.5522	4.09615	31.1311	31.3058	0.32682	Manual Ct		Manual	15	21	Manual	0.29434
270	38 (A)	MCP-1	SYBR	Unknown	31.6828	85.7	Auto Tm	14.8286	19.5522	4.09615	31.1311	31.3058	0.32682	Manual Ct		Manual	15	21	Manual	0.29434
223	39 (G)	MCP-1	SYBR	Unknown	30.3944	85.7	Auto Tm	36.0981	40.4862	4.0048	30.1953	30.2331	0.146117	Manual Ct		Manual	15	21	Manual	0.29434
247	39 (G)	MCP-1	SYBR	Unknown	30.1095	85.7	Auto Tm	43.944	40.4862	4.0048	30.1953	30.2331	0.146117	Manual Ct		Manual	15	21	Manual	0.29434
271	39 (G)	MCP-1	SYBR	Unknown	30.1953	85.7	Auto Tm	41.4163	40.4862	4.0048	30.1953	30.2331	0.146117	Manual Ct		Manual	15	21	Manual	0.29434
92	4 (12-2)	MCP-1	SYBR	Unknown	29.2113	85.6	Auto Tm	81.7111	87.0234	9.45838	29.2113	29.1255	0.153046	Manual Ct		Manual	15	21	Manual	0.29434
116	4 (12-2)	MCP-1	SYBR	Unknown	28.9488	85.6	Auto Tm	97.9437	87.0234	9.45838	29.2113	29.1255	0.153046	Manual Ct		Manual	15	21	Manual	0.29434
140	4 (12-2)	MCP-1	SYBR	Unknown	29.2165	85.6	Auto Tm	81.4155	87.0234	9.45838	29.2113	29.1255	0.153046	Manual Ct		Manual	15	21	Manual	0.29434
224	40 (H)	MCP-1	SYBR	Unknown	29.9806	86	Auto Tm	48.0355	41.4029	9.14453	30.0687	30.2218	0.344368	Manual Ct		Manual	15	21	Manual	0.29434
248	40 (H)	MCP-1	SYBR	Unknown	30.0687	85.7	Auto Tm	45.2021	41.4029	9.14453	30.0687	30.2218	0.344368	Manual Ct		Manual	15	21	Manual	0.29434
272	40 (H)	MCP-1	SYBR	Unknown	30.6162	85.7	Auto Tm	30.9712	41.4029	9.14453	30.0687	30.2218	0.344368	Manual Ct		Manual	15	21	Manual	0.29434
93	5 (13-1)	MCP-1	SYBR	Unknown	30.908	85.6	Auto Tm	25.3188	23.4429	6.38857	30.908	31.0596	0.428655	Manual Ct		Manual	15	21	Manual	0.29434
117	5 (13-1)	MCP-1	SYBR	Unknown	31.5435	85.6	Auto Tm	16.3264	23.4429	6.38857	30.908	31.0596	0.428655	Manual Ct		Manual	15	21	Manual	0.29434
141	5 (13-1)	MCP-1	SYBR	Unknown	30.7273	85.6	Auto Tm	28.6835	23.4429	6.38857	30.908	31.0596	0.428655	Manual Ct		Manual	15	21	Manual	0.29434
94	6 (14-1)	MCP-1	SYBR	Unknown	30.9152	85.5	Auto Tm	25.1936	30.5219	4.65734	30.5439	30.6494	0.231875	Manual Ct		Manual	15	21	Manual	0.29434
118	6 (14-1)	MCP-1	SYBR	Unknown	30.5439	85.5	Auto Tm	32.5558	30.5219	4.65734	30.5439	30.6494	0.231875	Manual Ct		Manual	15	21	Manual	0.29434
142	6 (14-1)	MCP-1	SYBR	Unknown	30.4889	85.5	Auto Tm	33.8164	30.5219	4.65734	30.5439	30.6494	0.231875	Manual Ct		Manual	15	21	Manual	0.29434
95	7 (15-1)	MCP-1	SYBR	Unknown	28.5409	85.5	Auto Tm	129.807	117.174	10.9766	28.7579	28.6933	0.132481	Manual Ct		Manual	15	21	Manual	0.29434
119	7 (15-1)	MCP-1	SYBR	Unknown	28.7579	85.5	Auto Tm	111.749	117.174	10.9766	28.7579	28.6933	0.132481	Manual Ct		Manual	15	21	Manual	0.29434
143	7 (15-1)	MCP-1	SYBR	Unknown	28.7812	85.5	Auto Tm	109.965	117.174	10.9766	28.7579	28.6933	0.132481	Manual Ct		Manual	15	21	Manual	0.29434
96	8 (15-2)	MCP-1	SYBR	Unknown	28.8497	85.5	Auto Tm	104.88	111.519	15.7583	28.8497	28.7701	0.198413	Manual Ct		Manual	15	21	Manual	0.29434
120	8 (15-2)	MCP-1	SYBR	Unknown	28.9163	85.5	Auto Tm	100.167	111.519	15.7583	28.8497	28.7701	0.198413	Manual Ct		Manual	15	21	Manual	0.29434
144	8 (15-2)	MCP-1	SYBR	Unknown	28.5442	85.5	Auto Tm	129.511	111.519	15.7583	28.8497	28.7701	0.198413	Manual Ct		Manual	15	21	Manual	0.29434
145	9 (16-1)	MCP-1	SYBR	Unknown	30.6477	85.5	Auto Tm	30.3043	31.8372	2.33506	30.6298	30.5788	0.104218	Manual Ct		Manual	15	21	Manual	0.29434
169	9 (16-1)	MCP-1	SYBR	Unknown	30.6298	85.5	Auto Tm	30.6827	31.8372	2.33506	30.6298	30.5788	0.104218	Manual Ct		Manual	15	21	Manual	0.29434
193	9 (16-1)	MCP-1	SYBR	Unknown	30.4589	85.5	Auto Tm	34.5247	31.8372	2.33506	30.6298	30.5788	0.104218	Manual Ct		Manual	15	21	Manual	0.29434
371	Gene 2 Standard (1)	MCP-1	SYBR	Standard	35.714	85.6	Auto Tm	1						Manual Ct		Manual	15	21	Manual	0.29434
369	Gene 2 Standard (10)	MCP-1	SYBR	Standard	32.0014	85.7	Auto Tm	10						Manual Ct		Manual	15	21	Manual	0.29434
367	Gene 2 Standard (100)	MCP-1	SYBR	Standard	29.0447	86	Auto Tm	100						Manual Ct		Manual	15	21	Manual	0.29434
380	NTC Gene 2	MCP-1	SYBR	NTC	Undetermined	61.8	Auto Tm	0						Manual Ct		Manual	15	21	Manual	0.29434						TRUE
383	RT Negative 2	MCP-1	SYBR	NTC	Undetermined	61.7	Auto Tm	0						Manual Ct		Manual	15	21	Manual	0.29434						TRUE
Slope	-3.33463	cycles/log decade
Y-Intercept		35.588
R^2		0.995735
Y-Intercept		35.593
R^2		0.992126
		MCP-1	18S
	Mouse ID	Qty Mean	Qty Mean	Ratio	Normalized values	Mice groups										Mean	STDEV	SE
1	11-1 (4%+RC+HFHC)	56.8944	16.1897	3.51423	0.629552	18%- 4 WEEKS	0.265977	=F169	0.127707							0.196842	0.097772	0.0564487
2	11-2 (4%+RC+HFHC)	233.459	17.3774	13.4347	2.40673	4%- 4 WEEKS	=F166	1.22362	1.58348	1.17192						1.32634	0.224187	0.112093	P = <0.001	***
3	12-1 (18%+RC+HFHC)	39.1862	29.3828	1.33364	0.238914
4	12-2 (18%+RC+HFHC)	87.0234	18.8159	4.625	0.828539	18%+RC - 4 WEEKS	0.196671	0.204645	0.221168							0.207494	0.0124947	0.0072138
5	13-1 (4%+RC+RC)	23.4429	31.6372	0.740991	0.132744	4%+RC - 4 WEEKS	0.227875	0.283814	0.192013							0.234567	0.0462653	0.0267113	P = 0.383
6	14-1 (18%+RC+RC)	30.5219	20.4911	1.48952	0.266838
7	15-1 (4%+RC+HFHC)	117.174	15.311	7.65291	1.37097	18%+RC+RC	0.266838	0.451019	0.372701	0.114412	0.193222	0.214989	0.242696			0.265125	0.113309	0.0428267
8	15-2 (4%+RC+HFHC)	111.519	19.3291	5.76951	1.03357	18%+RC+HFHC	0.238914	0.828539	1.83229	=F146	1.45711					1.08921	0.702013	0.351007	P = 0.030	*
9	16-1 (4%+RC+RC)	31.8372	19.7214	1.61435	0.2892
10	17-1 (18%+RC+HFHC)	222.271	21.7315	10.228	1.83229	4%+RC+RC	0.132744	0.2892	0.543362	0.218064	0.233621	0.719015				0.356001	0.225917	0.0922303
11	17-2 (18%+RC+HFHC)	1037.97	20.1731	51.4532	9.2175	4%+RC+HFHC	0.629552	2.40673	1.37097	1.03357	1.48924	0.629612	0.820022	0.183391	0.596615	1.01774	0.660543	0.220181	P = 0.036	*
12	18-1 (18%+RC+RC)	46.4808	18.462	2.51764	0.451019
13	19-1 (4%+RC+HFHC)	144.835	17.4224	8.31314	1.48924
14	20-1 (4%+RC+RC)	52.0863	17.1726	3.03311	0.543362											Mean		SE
15	21-1 (4%+RC+HFHC)	72.2004	20.5432	3.51457	0.629612											0.196842	1	0.0564487	0.286771
16	21-2 (4%+RC+HFHC)	96.5457	21.0915	4.57746	0.820022											1.32634	6.73808	0.112093	0.569458
17	22-1 (4%+RC+RC)	25.1018	20.6215	1.21726	0.218064
18	23-1 (4%+RC+HFHC)	27.7038	27.0621	1.02371	0.183391											0.207494	1.05412	0.0072138	0.0366476
19	23-2 (4%+RC+HFHC)	89.3533	26.8298	3.33038	0.596615											0.234567	1.19165	0.0267113	0.135699
20	24-1 (4%+RC+RC)	21.5603	16.5327	1.3041	0.233621
21	24-2 (4%+RC+RC)	80.18	19.9769	4.01363	0.719015											0.265125	1.34689	0.0428267	0.217569
22	25-2 (18%+RC+HFHC)	173.769	21.364	8.13375	1.45711											1.08921	5.53343	0.351007	1.78319
23	26-1 (18%+RC+RC)	38.4617	18.4871	2.08046	0.372701
24	26-2 (18%+RC+RC)	15.2093	23.8143	0.638662	0.114412											0.356001	1.80856	0.0922303	0.46855
25	27-1 (4%+RC - 5 WEEKS)	28.3092	22.2552	1.27202	0.227875											1.01774	5.17036	0.220181	1.11857
26	27-2 (4%+RC - 5 WEEKS)	35.7045	22.5366	1.58429	0.283814
27	27-3 (4%+RC - 5 WEEKS)	24.431	22.7935	1.07184	0.192013
28	28-1 (18%+RC - 4 WEEKS)	25.7853	23.4873	1.09784	0.196671
29	28-2 (18%+RC - 4 WEEKS)	23.5138	20.5837	1.14235	0.204645
30	28-3 (18%+RC - 4 WEEKS)	22.9102	18.557	1.23458	0.221168
31	29-1 (4%- 4 WEEKS)	418.676	17.5716	23.8268	4.26842		0.265977	=F166		0.196671	0.227875		0.266838	0.238914		0.132744	0.629552
32	29-2 (4%- 4 WEEKS)	138.53	20.2815	6.83037	1.22362		=F169	1.22362		0.204645	0.283814		0.451019	0.828539		0.2892	2.40673
33	30-1 (18%- 4 WEEKS)	42.3145	28.5	1.48472	0.265977		0.127707	1.58348		0.221168	0.192013		0.372701	1.83229		0.543362	1.37097
34	30-2 (18%- 4 WEEKS)	421.899	22.8563	18.4588	3.30676			1.17192					0.114412	=F146		0.218064	1.03357
35	31-1 (4%- 4 WEEKS)	181.59	20.5437	8.83918	1.58348								0.193222	1.45711		0.233621	1.48924
36	31-2 (4%- 4 WEEKS)	120.212	18.3761	6.54179	1.17192								0.214989			0.719015	0.629612
37	32-1 (18%- 4 WEEKS)	18.6428	26.1516	0.712875	0.127707								0.242696				0.820022
38	A (18%+RC+RC)	19.5522	18.1276	1.07859	0.193222												0.183391
39	G (18%+RC+RC)	40.4862	33.7358	1.20009	0.214989												0.596615
40	H (18%+RC+RC)	41.4029	30.5612	1.35476	0.242696
				5.58212

## Sheet: NLRP3
Well	Sample Name	Detector Name	Reporter	Task	Ct	Tm Value	Tm Type	Quantity	Qty Mean	Qty StdDev	Ct Median	Ct Mean	Ct StdDev	Ct Type	Template Name	Baseline Type	Baseline Start	Baseline Stop	Threshold Type	Threshold	FOS	HMD	LME	EW	BPR	NAW	HNS	HRN	EAF	BAF	TAF	CAF
225	1 (11-1)	NLRP3	SYBR	Unknown	28.752	83	Auto Tm	81.3945	67.9011	11.8552	29.0403	28.9689	0.191498	Manual Ct		Manual	17	22	Manual	0.401598
249	1 (11-1)	NLRP3	SYBR	Unknown	29.0403	83.2	Auto Tm	63.1527	67.9011	11.8552	29.0403	28.9689	0.191498	Manual Ct		Manual	17	22	Manual	0.401598
273	1 (11-1)	NLRP3	SYBR	Unknown	29.1145	83	Auto Tm	59.1562	67.9011	11.8552	29.0403	28.9689	0.191498	Manual Ct		Manual	17	22	Manual	0.401598
234	10 (17-1)	NLRP3	SYBR	Unknown	27.7188	82.9	Auto Tm	202.112	179.616	20.6413	27.8812	27.8578	0.12885	Manual Ct		Manual	17	22	Manual	0.401598
258	10 (17-1)	NLRP3	SYBR	Unknown	27.9733	82.9	Auto Tm	161.548	179.616	20.6413	27.8812	27.8578	0.12885	Manual Ct		Manual	17	22	Manual	0.401598					TRUE
282	10 (17-1)	NLRP3	SYBR	Unknown	27.8812	82.9	Auto Tm	175.187	179.616	20.6413	27.8812	27.8578	0.12885	Manual Ct		Manual	17	22	Manual	0.401598
235	11 (17-2)	NLRP3	SYBR	Unknown	27.2338	82.9	Auto Tm	309.75	300.425	8.47547	27.2765	27.2688	0.0318996	Manual Ct		Manual	17	22	Manual	0.401598
259	11 (17-2)	NLRP3	SYBR	Unknown	27.2962	82.9	Auto Tm	293.19	300.425	8.47547	27.2765	27.2688	0.0318996	Manual Ct		Manual	17	22	Manual	0.401598
283	11 (17-2)	NLRP3	SYBR	Unknown	27.2765	82.9	Auto Tm	298.336	300.425	8.47547	27.2765	27.2688	0.0318996	Manual Ct		Manual	17	22	Manual	0.401598
236	12 (18-1)	NLRP3	SYBR	Unknown	29.3435	83.1	Auto Tm	48.3576	58.4222	9.57411	29.1081	29.1392	0.190634	Manual Ct		Manual	17	22	Manual	0.401598
260	12 (18-1)	NLRP3	SYBR	Unknown	29.1081	82.9	Auto Tm	59.4934	58.4222	9.57411	29.1081	29.1392	0.190634	Manual Ct		Manual	17	22	Manual	0.401598
284	12 (18-1)	NLRP3	SYBR	Unknown	28.966	82.9	Auto Tm	67.4157	58.4222	9.57411	29.1081	29.1392	0.190634	Manual Ct		Manual	17	22	Manual	0.401598
237	13 (19-1)	NLRP3	SYBR	Unknown	27.9208	82.9	Auto Tm	169.182	168.114	8.12966	27.9208	27.9289	0.0552385	Manual Ct		Manual	17	22	Manual	0.401598
261	13 (19-1)	NLRP3	SYBR	Unknown	27.9878	82.9	Auto Tm	159.504	168.114	8.12966	27.9208	27.9289	0.0552385	Manual Ct		Manual	17	22	Manual	0.401598
285	13 (19-1)	NLRP3	SYBR	Unknown	27.8782	82.9	Auto Tm	175.658	168.114	8.12966	27.9208	27.9289	0.0552385	Manual Ct		Manual	17	22	Manual	0.401598
238	14 (20-1)	NLRP3	SYBR	Unknown	28.5082	82.9	Auto Tm	100.877	115.943	15.1897	28.3525	28.3566	0.149555	Manual Ct		Manual	17	22	Manual	0.401598
262	14 (20-1)	NLRP3	SYBR	Unknown	28.2092	82.9	Auto Tm	131.253	115.943	15.1897	28.3525	28.3566	0.149555	Manual Ct		Manual	17	22	Manual	0.401598
286	14 (20-1)	NLRP3	SYBR	Unknown	28.3525	82.9	Auto Tm	115.7	115.943	15.1897	28.3525	28.3566	0.149555	Manual Ct		Manual	17	22	Manual	0.401598
239	15 (21-1)	NLRP3	SYBR	Unknown	29.2463	82.9	Auto Tm	52.6757	63.5678	10.3277	29.0109	29.0431	0.189118	Manual Ct		Manual	17	22	Manual	0.401598
263	15 (21-1)	NLRP3	SYBR	Unknown	29.0109	82.9	Auto Tm	64.8087	63.5678	10.3277	29.0109	29.0431	0.189118	Manual Ct		Manual	17	22	Manual	0.401598
287	15 (21-1)	NLRP3	SYBR	Unknown	28.8722	82.9	Auto Tm	73.2191	63.5678	10.3277	29.0109	29.0431	0.189118	Manual Ct		Manual	17	22	Manual	0.401598
240	16 (21-2)	NLRP3	SYBR	Unknown	28.6296	82.9	Auto Tm	90.6553	74.0602	14.3719	28.9931	28.8727	0.21054	Manual Ct		Manual	17	22	Manual	0.401598
264	16 (21-2)	NLRP3	SYBR	Unknown	28.9954	82.6	Auto Tm	65.6974	74.0602	14.3719	28.9931	28.8727	0.21054	Manual Ct		Manual	17	22	Manual	0.401598
288	16 (21-2)	NLRP3	SYBR	Unknown	28.9931	82.6	Auto Tm	65.828	74.0602	14.3719	28.9931	28.8727	0.21054	Manual Ct		Manual	17	22	Manual	0.401598
289	17 (22-1)	NLRP3	SYBR	Unknown	30.5831	82.5	Auto Tm	16.239	27.5148	12.2698	30.0605	30.0621	0.520223	Manual Ct		Manual	17	22	Manual	0.401598
313	17 (22-1)	NLRP3	SYBR	Unknown	30.0605	82.5	Auto Tm	25.7236	27.5148	12.2698	30.0605	30.0621	0.520223	Manual Ct		Manual	17	22	Manual	0.401598
337	17 (22-1)	NLRP3	SYBR	Unknown	29.5426	82.5	Auto Tm	40.5817	27.5148	12.2698	30.0605	30.0621	0.520223	Manual Ct		Manual	17	22	Manual	0.401598
290	18 (23-1)	NLRP3	SYBR	Unknown	29.8982	82.8	Auto Tm	29.6761	28.2954	7.34447	29.8982	29.98	0.313462	Manual Ct		Manual	17	22	Manual	0.401598
314	18 (23-1)	NLRP3	SYBR	Unknown	30.3262	82.5	Auto Tm	20.3586	28.2954	7.34447	29.8982	29.98	0.313462	Manual Ct		Manual	17	22	Manual	0.401598
338	18 (23-1)	NLRP3	SYBR	Unknown	29.7155	82.5	Auto Tm	34.8516	28.2954	7.34447	29.8982	29.98	0.313462	Manual Ct		Manual	17	22	Manual	0.401598
291	19 (23-2)	NLRP3	SYBR	Unknown	29.5223	82.8	Auto Tm	41.3161	48.962	7.60387	29.3274	29.3386	0.178271	Manual Ct		Manual	17	22	Manual	0.401598
315	19 (23-2)	NLRP3	SYBR	Unknown	29.1662	82.5	Auto Tm	56.5231	48.962	7.60387	29.3274	29.3386	0.178271	Manual Ct		Manual	17	22	Manual	0.401598
339	19 (23-2)	NLRP3	SYBR	Unknown	29.3274	82.5	Auto Tm	49.0468	48.962	7.60387	29.3274	29.3386	0.178271	Manual Ct		Manual	17	22	Manual	0.401598
226	2 (11-2)	NLRP3	SYBR	Unknown	28.0902	83.2	Auto Tm	145.752	147.443	10.5282	28.0902	28.079	0.0805845	Manual Ct		Manual	17	22	Manual	0.401598
250	2 (11-2)	NLRP3	SYBR	Unknown	28.1534	83.2	Auto Tm	137.863	147.443	10.5282	28.0902	28.079	0.0805845	Manual Ct		Manual	17	22	Manual	0.401598
274	2 (11-2)	NLRP3	SYBR	Unknown	27.9934	83.2	Auto Tm	158.714	147.443	10.5282	28.0902	28.079	0.0805845	Manual Ct		Manual	17	22	Manual	0.401598
292	20 (24-1)	NLRP3	SYBR	Unknown	29.7629	82.8	Auto Tm	33.4298	29.3374	3.55658	29.981	29.9166	0.133676	Manual Ct		Manual	17	22	Manual	0.401598
316	20 (24-1)	NLRP3	SYBR	Unknown	30.0058	82.8	Auto Tm	26.9938	29.3374	3.55658	29.981	29.9166	0.133676	Manual Ct		Manual	17	22	Manual	0.401598
340	20 (24-1)	NLRP3	SYBR	Unknown	29.981	82.5	Auto Tm	27.5886	29.3374	3.55658	29.981	29.9166	0.133676	Manual Ct		Manual	17	22	Manual	0.401598
293	21 (24-2)	NLRP3	SYBR	Unknown	29.001	82.7	Auto Tm	65.3756	71.7299	12.0487	29.001	28.9057	0.183279	Manual Ct		Manual	17	22	Manual	0.401598
317	21 (24-2)	NLRP3	SYBR	Unknown	28.6944	82.7	Auto Tm	85.6257	71.7299	12.0487	29.001	28.9057	0.183279	Manual Ct		Manual	17	22	Manual	0.401598
341	21 (24-2)	NLRP3	SYBR	Unknown	29.0218	82.7	Auto Tm	64.1886	71.7299	12.0487	29.001	28.9057	0.183279	Manual Ct		Manual	17	22	Manual	0.401598
294	22 (25-2)	NLRP3	SYBR	Unknown	29.1594	83	Auto Tm	56.8635	63.9245	12.6456	29.1594	29.0404	0.214495	Manual Ct		Manual	17	22	Manual	0.401598
318	22 (25-2)	NLRP3	SYBR	Unknown	28.7928	83	Auto Tm	78.5238	63.9245	12.6456	29.1594	29.0404	0.214495	Manual Ct		Manual	17	22	Manual	0.401598
342	22 (25-2)	NLRP3	SYBR	Unknown	29.169	82.7	Auto Tm	56.3861	63.9245	12.6456	29.1594	29.0404	0.214495	Manual Ct		Manual	17	22	Manual	0.401598
295	23 (26-1)	NLRP3	SYBR	Unknown	29.5081	83	Auto Tm	41.8355	48.5224	8.35802	29.4042	29.3504	0.190297	Manual Ct		Manual	17	22	Manual	0.401598
319	23 (26-1)	NLRP3	SYBR	Unknown	29.139	83	Auto Tm	57.8925	48.5224	8.35802	29.4042	29.3504	0.190297	Manual Ct		Manual	17	22	Manual	0.401598
343	23 (26-1)	NLRP3	SYBR	Unknown	29.4042	83	Auto Tm	45.8393	48.5224	8.35802	29.4042	29.3504	0.190297	Manual Ct		Manual	17	22	Manual	0.401598
296	24 (26-2)	NLRP3	SYBR	Unknown	30.0439	82.7	Auto Tm	26.1028	24.2795	2.65265	30.0705	30.1309	0.12834	Manual Ct		Manual	17	22	Manual	0.401598
320	24 (26-2)	NLRP3	SYBR	Unknown	30.2783	83	Auto Tm	21.2364	24.2795	2.65265	30.0705	30.1309	0.12834	Manual Ct		Manual	17	22	Manual	0.401598
344	24 (26-2)	NLRP3	SYBR	Unknown	30.0705	82.7	Auto Tm	25.4994	24.2795	2.65265	30.0705	30.1309	0.12834	Manual Ct		Manual	17	22	Manual	0.401598
297	25 (27-1)	NLRP3	SYBR	Unknown	28.8253	83.2	Auto Tm	76.3106	68.4454	12.2259	28.85	28.962	0.215662	Manual Ct		Manual	17	22	Manual	0.401598
321	25 (27-1)	NLRP3	SYBR	Unknown	29.2106	83	Auto Tm	54.3602	68.4454	12.2259	28.85	28.962	0.215662	Manual Ct		Manual	17	22	Manual	0.401598
345	25 (27-1)	NLRP3	SYBR	Unknown	28.85	83	Auto Tm	74.6656	68.4454	12.2259	28.85	28.962	0.215662	Manual Ct		Manual	17	22	Manual	0.401598
298	26 (27-2)	NLRP3	SYBR	Unknown	28.6808	83.2	Auto Tm	86.6573	76.4091	11.3443	28.7953	28.8324	0.173217	Manual Ct		Manual	17	22	Manual	0.401598
322	26 (27-2)	NLRP3	SYBR	Unknown	28.7953	83.2	Auto Tm	78.3508	76.4091	11.3443	28.7953	28.8324	0.173217	Manual Ct		Manual	17	22	Manual	0.401598
346	26 (27-2)	NLRP3	SYBR	Unknown	29.0212	83.2	Auto Tm	64.2193	76.4091	11.3443	28.7953	28.8324	0.173217	Manual Ct		Manual	17	22	Manual	0.401598
299	27 (27-3)	NLRP3	SYBR	Unknown	29.0485	83.2	Auto Tm	62.6943	58.0257	7.50317	29.061	29.1431	0.15323	Manual Ct		Manual	17	22	Manual	0.401598
323	27 (27-3)	NLRP3	SYBR	Unknown	29.3199	83.2	Auto Tm	49.3707	58.0257	7.50317	29.061	29.1431	0.15323	Manual Ct		Manual	17	22	Manual	0.401598
347	27 (27-3)	NLRP3	SYBR	Unknown	29.061	83.2	Auto Tm	62.0121	58.0257	7.50317	29.061	29.1431	0.15323	Manual Ct		Manual	17	22	Manual	0.401598
300	28 (28-1)	NLRP3	SYBR	Unknown	29.8574	83.2	Auto Tm	30.7602	28.9184	1.86178	29.926	29.9291	0.0733234	Manual Ct		Manual	17	22	Manual	0.401598
324	28 (28-1)	NLRP3	SYBR	Unknown	29.926	83	Auto Tm	28.9577	28.9184	1.86178	29.926	29.9291	0.0733234	Manual Ct		Manual	17	22	Manual	0.401598
348	28 (28-1)	NLRP3	SYBR	Unknown	30.0039	83	Auto Tm	27.0373	28.9184	1.86178	29.926	29.9291	0.0733234	Manual Ct		Manual	17	22	Manual	0.401598
301	29 (28-2)	NLRP3	SYBR	Unknown	29.0537	83.2	Auto Tm	62.4121	61.0286	4.9151	29.0537	29.0816	0.0931411	Manual Ct		Manual	17	22	Manual	0.401598
325	29 (28-2)	NLRP3	SYBR	Unknown	29.0057	83.2	Auto Tm	65.1036	61.0286	4.9151	29.0537	29.0816	0.0931411	Manual Ct		Manual	17	22	Manual	0.401598
349	29 (28-2)	NLRP3	SYBR	Unknown	29.1856	82.9	Auto Tm	55.57	61.0286	4.9151	29.0537	29.0816	0.0931411	Manual Ct		Manual	17	22	Manual	0.401598
227	3 (12-1)	NLRP3	SYBR	Unknown	29.5558	83.2	Auto Tm	40.1142	46.9164	6.35643	29.3536	29.385	0.157425	Manual Ct		Manual	17	22	Manual	0.401598
251	3 (12-1)	NLRP3	SYBR	Unknown	29.2457	83.2	Auto Tm	52.7053	46.9164	6.35643	29.3536	29.385	0.157425	Manual Ct		Manual	17	22	Manual	0.401598
275	3 (12-1)	NLRP3	SYBR	Unknown	29.3536	83.2	Auto Tm	47.9297	46.9164	6.35643	29.3536	29.385	0.157425	Manual Ct		Manual	17	22	Manual	0.401598
302	30 (28-3)	NLRP3	SYBR	Unknown	28.4615	83.2	Auto Tm	105.112	78.4601	27.1551	28.7796	28.8427	0.416283	Manual Ct		Manual	17	22	Manual	0.401598
326	30 (28-3)	NLRP3	SYBR	Unknown	29.2869	83.2	Auto Tm	50.8282	78.4601	27.1551	28.7796	28.8427	0.416283	Manual Ct		Manual	17	22	Manual	0.401598
350	30 (28-3)	NLRP3	SYBR	Unknown	28.7796	83.2	Auto Tm	79.4402	78.4601	27.1551	28.7796	28.8427	0.416283	Manual Ct		Manual	17	22	Manual	0.401598
303	31 (29-1)	NLRP3	SYBR	Unknown	27.5304	83.2	Auto Tm	238.571	260.352	33.5027	27.5069	27.4372	0.141633	Manual Ct		Manual	17	22	Manual	0.401598
327	31 (29-1)	NLRP3	SYBR	Unknown	27.5069	82.9	Auto Tm	243.556	260.352	33.5027	27.5069	27.4372	0.141633	Manual Ct		Manual	17	22	Manual	0.401598
351	31 (29-1)	NLRP3	SYBR	Unknown	27.2742	82.9	Auto Tm	298.931	260.352	33.5027	27.5069	27.4372	0.141633	Manual Ct		Manual	17	22	Manual	0.401598
304	32 (29-2)	NLRP3	SYBR	Unknown	28.2811	83.2	Auto Tm	123.203	116.694	8.99883	28.3067	28.3451	0.0895356	Manual Ct		Manual	17	22	Manual	0.401598
328	32 (29-2)	NLRP3	SYBR	Unknown	28.4474	83.2	Auto Tm	106.425	116.694	8.99883	28.3067	28.3451	0.0895356	Manual Ct		Manual	17	22	Manual	0.401598
352	32 (29-2)	NLRP3	SYBR	Unknown	28.3067	83.2	Auto Tm	120.455	116.694	8.99883	28.3067	28.3451	0.0895356	Manual Ct		Manual	17	22	Manual	0.401598
305	33 (30-1)	NLRP3	SYBR	Unknown	29.1604	83.2	Auto Tm	56.8162	66.9739	9.03242	28.9233	28.9808	0.158873	Manual Ct		Manual	17	22	Manual	0.401598
329	33 (30-1)	NLRP3	SYBR	Unknown	28.8586	83.2	Auto Tm	74.1023	66.9739	9.03242	28.9233	28.9808	0.158873	Manual Ct		Manual	17	22	Manual	0.401598
353	33 (30-1)	NLRP3	SYBR	Unknown	28.9233	82.9	Auto Tm	70.0031	66.9739	9.03242	28.9233	28.9808	0.158873	Manual Ct		Manual	17	22	Manual	0.401598
306	34 (30-2)	NLRP3	SYBR	Unknown	27.9109	82.9	Auto Tm	170.674	179.788	21.675	27.9109	27.8571	0.133299	Manual Ct		Manual	17	22	Manual	0.401598
330	34 (30-2)	NLRP3	SYBR	Unknown	27.7053	82.9	Auto Tm	204.532	179.788	21.675	27.9109	27.8571	0.133299	Manual Ct		Manual	17	22	Manual	0.401598
354	34 (30-2)	NLRP3	SYBR	Unknown	27.9551	82.9	Auto Tm	164.159	179.788	21.675	27.9109	27.8571	0.133299	Manual Ct		Manual	17	22	Manual	0.401598
307	35 (31-1)	NLRP3	SYBR	Unknown	27.3984	82.9	Auto Tm	267.971	215.225	45.9877	27.7644	27.6637	0.231969	Manual Ct		Manual	17	22	Manual	0.401598
331	35 (31-1)	NLRP3	SYBR	Unknown	27.8283	82.9	Auto Tm	183.537	215.225	45.9877	27.7644	27.6637	0.231969	Manual Ct		Manual	17	22	Manual	0.401598
355	35 (31-1)	NLRP3	SYBR	Unknown	27.7644	82.9	Auto Tm	194.167	215.225	45.9877	27.7644	27.6637	0.231969	Manual Ct		Manual	17	22	Manual	0.401598
308	36 (31-2)	NLRP3	SYBR	Unknown	28.1317	82.9	Auto Tm	140.522	168.718	24.5208	27.8468	27.9325	0.173077	Manual Ct		Manual	17	22	Manual	0.401598
332	36 (31-2)	NLRP3	SYBR	Unknown	27.819	82.9	Auto Tm	185.055	168.718	24.5208	27.8468	27.9325	0.173077	Manual Ct		Manual	17	22	Manual	0.401598
356	36 (31-2)	NLRP3	SYBR	Unknown	27.8468	82.9	Auto Tm	180.576	168.718	24.5208	27.8468	27.9325	0.173077	Manual Ct		Manual	17	22	Manual	0.401598
309	37 (32-1)	NLRP3	SYBR	Unknown	29.5072	82.9	Auto Tm	41.8663	34.3391	8.629	29.6715	29.7584	0.304101	Manual Ct		Manual	17	22	Manual	0.401598
333	37 (32-1)	NLRP3	SYBR	Unknown	30.0965	82.9	Auto Tm	24.9217	34.3391	8.629	29.6715	29.7584	0.304101	Manual Ct		Manual	17	22	Manual	0.401598
357	37 (32-1)	NLRP3	SYBR	Unknown	29.6715	82.6	Auto Tm	36.2293	34.3391	8.629	29.6715	29.7584	0.304101	Manual Ct		Manual	17	22	Manual	0.401598
310	38 (A)	NLRP3	SYBR	Unknown	30.2835	82.6	Auto Tm	21.1395	20.7848	9.27072	30.2835	30.3883	0.557515	Manual Ct		Manual	17	22	Manual	0.401598
334	38 (A)	NLRP3	SYBR	Unknown	29.8906	82.6	Auto Tm	29.8731	20.7848	9.27072	30.2835	30.3883	0.557515	Manual Ct		Manual	17	22	Manual	0.401598
358	38 (A)	NLRP3	SYBR	Unknown	30.9908	82.9	Auto Tm	11.3418	20.7848	9.27072	30.2835	30.3883	0.557515	Manual Ct		Manual	17	22	Manual	0.401598
311	39 (G)	NLRP3	SYBR	Unknown	30.0017	82.6	Auto Tm	27.0918	22.459	4.10878	30.2895	30.2269	0.201334	Manual Ct		Manual	17	22	Manual	0.401598
335	39 (G)	NLRP3	SYBR	Unknown	30.3895	82.6	Auto Tm	19.2566	22.459	4.10878	30.2895	30.2269	0.201334	Manual Ct		Manual	17	22	Manual	0.401598
359	39 (G)	NLRP3	SYBR	Unknown	30.2895	82.6	Auto Tm	21.0286	22.459	4.10878	30.2895	30.2269	0.201334	Manual Ct		Manual	17	22	Manual	0.401598
228	4 (12-2)	NLRP3	SYBR	Unknown	28.4404	83.2	Auto Tm	107.08	119.357	10.773	28.276	28.3203	0.105197	Manual Ct		Manual	17	22	Manual	0.401598
252	4 (12-2)	NLRP3	SYBR	Unknown	28.276	83.2	Auto Tm	123.759	119.357	10.773	28.276	28.3203	0.105197	Manual Ct		Manual	17	22	Manual	0.401598
276	4 (12-2)	NLRP3	SYBR	Unknown	28.2446	83.2	Auto Tm	127.232	119.357	10.773	28.276	28.3203	0.105197	Manual Ct		Manual	17	22	Manual	0.401598
312	40 (H)	NLRP3	SYBR	Unknown	28.8949	82.6	Auto Tm	71.7706	66.7871	11.863	28.8949	28.9896	0.213549	Manual Ct		Manual	17	22	Manual	0.401598
336	40 (H)	NLRP3	SYBR	Unknown	28.8397	82.6	Auto Tm	75.3455	66.7871	11.863	28.8949	28.9896	0.213549	Manual Ct		Manual	17	22	Manual	0.401598
360	40 (H)	NLRP3	SYBR	Unknown	29.2341	82.6	Auto Tm	53.2453	66.7871	11.863	28.8949	28.9896	0.213549	Manual Ct		Manual	17	22	Manual	0.401598
229	5 (13-1)	NLRP3	SYBR	Unknown	30.4692	83.2	Auto Tm	17.9507	15.5857	4.27524	30.4692	30.6626	0.346158	Manual Ct		Manual	17	22	Manual	0.401598
253	5 (13-1)	NLRP3	SYBR	Unknown	31.0622	83.2	Auto Tm	10.6505	15.5857	4.27524	30.4692	30.6626	0.346158	Manual Ct		Manual	17	22	Manual	0.401598
277	5 (13-1)	NLRP3	SYBR	Unknown	30.4563	83.2	Auto Tm	18.156	15.5857	4.27524	30.4692	30.6626	0.346158	Manual Ct		Manual	17	22	Manual	0.401598
230	6 (14-1)	NLRP3	SYBR	Unknown	28.7847	83.2	Auto Tm	79.0845	69.299	10.5624	28.9118	28.9438	0.177301	Manual Ct		Manual	17	22	Manual	0.401598
254	6 (14-1)	NLRP3	SYBR	Unknown	28.9118	83.2	Auto Tm	70.7108	69.299	10.5624	28.9118	28.9438	0.177301	Manual Ct		Manual	17	22	Manual	0.401598
278	6 (14-1)	NLRP3	SYBR	Unknown	29.1349	83.2	Auto Tm	58.1017	69.299	10.5624	28.9118	28.9438	0.177301	Manual Ct		Manual	17	22	Manual	0.401598
231	7 (15-1)	NLRP3	SYBR	Unknown	28.735	83.2	Auto Tm	82.6194	71.1503	12.0455	28.8877	28.916	0.196631	Manual Ct		Manual	17	22	Manual	0.401598
255	7 (15-1)	NLRP3	SYBR	Unknown	29.1252	83.2	Auto Tm	58.6012	71.1503	12.0455	28.8877	28.916	0.196631	Manual Ct		Manual	17	22	Manual	0.401598
279	7 (15-1)	NLRP3	SYBR	Unknown	28.8877	83.2	Auto Tm	72.2303	71.1503	12.0455	28.8877	28.916	0.196631	Manual Ct		Manual	17	22	Manual	0.401598
232	8 (15-2)	NLRP3	SYBR	Unknown	29.0096	83.2	Auto Tm	64.8811	62.385	19.0577	29.0096	29.0928	0.370833	Manual Ct		Manual	17	22	Manual	0.401598
256	8 (15-2)	NLRP3	SYBR	Unknown	29.4981	83.2	Auto Tm	42.2023	62.385	19.0577	29.0096	29.0928	0.370833	Manual Ct		Manual	17	22	Manual	0.401598
280	8 (15-2)	NLRP3	SYBR	Unknown	28.7706	83.2	Auto Tm	80.0717	62.385	19.0577	29.0096	29.0928	0.370833	Manual Ct		Manual	17	22	Manual	0.401598
233	9 (16-1)	NLRP3	SYBR	Unknown	29.7899	83.2	Auto Tm	32.6445	30.6797	3.86681	29.7899	29.8667	0.149117	Manual Ct		Manual	17	22	Manual	0.401598
257	9 (16-1)	NLRP3	SYBR	Unknown	30.0386	83.2	Auto Tm	26.225	30.6797	3.86681	29.7899	29.8667	0.149117	Manual Ct		Manual	17	22	Manual	0.401598
281	9 (16-1)	NLRP3	SYBR	Unknown	29.7717	82.9	Auto Tm	33.1696	30.6797	3.86681	29.7899	29.8667	0.149117	Manual Ct		Manual	17	22	Manual	0.401598
377	Gene 3 Standard (1)	NLRP3	SYBR	Standard	33.7902	81.3	Auto Tm	1						Manual Ct		Manual	17	22	Manual	0.401598
375	Gene 3 Standard (10)	NLRP3	SYBR	Standard	31.0524	83.2	Auto Tm	10						Manual Ct		Manual	17	22	Manual	0.401598
373	Gene 3 Standard (100)	NLRP3	SYBR	Standard	28.5588	82.7	Auto Tm	100						Manual Ct		Manual	17	22	Manual	0.401598
381	NTC Gene 3	NLRP3	SYBR	NTC	Undetermined	61.8	Auto Tm	0						Manual Ct		Manual	17	22	Manual	0.401598						TRUE
384	RT Negative 3	NLRP3	SYBR	NTC	Undetermined	61.7	Auto Tm	0						Manual Ct		Manual	17	22	Manual	0.401598						TRUE
Slope	-2.61568	cycles/log decade
Y-Intercept		33.7495
R^2		0.999274
Y-Intercept		32.0286
R^2		0.992649
		NLRP3	18S
	Mouse ID	Qty Mean	Qty Mean	Ratio	Normalized values	Mice groups										Mean	STDEV	SE
1	11-1 (4%+RC+HFHC)	67.9011	16.1897	4.1941	0.971702	18%- 4 WEEKS	0.544446	=F169	0.304218							0.424332	0.169867	0.0980725
2	11-2 (4%+RC+HFHC)	147.443	17.3774	8.48477	1.96578	4%- 4 WEEKS	3.43277	1.33304	2.42722	2.12717						2.33005	0.868066	0.434033	P = 0.044	*
3	12-1 (18%+RC+HFHC)	46.9164	29.3828	1.59673	0.369935
4	12-2 (18%+RC+HFHC)	119.357	18.8159	6.34342	1.46967	18%+RC - 4 WEEKS	0.285257	0.686918	0.979569							0.650581	0.348579	0.201252
5	13-1 (4%+RC+RC)	15.5857	31.6372	0.492639	0.114136	4%+RC - 4 WEEKS	0.712536	0.785508	0.589798							0.695948	0.098904	0.0571022	P = 0.839
6	14-1 (18%+RC+RC)	69.299	20.4911	3.38191	0.783532
7	15-1 (4%+RC+HFHC)	71.1503	15.311	4.647	1.07663	18%+RC+RC			0.60809	0.2362	0.265644		0.506311			0.404061	0.182043	0.0688059
8	15-2 (4%+RC+HFHC)	62.385	19.3291	3.22752	0.747763	18%+RC+HFHC		1.46967	1.91491		0.693234					1.35927	0.618275	0.276501	P = 0.03	*
9	16-1 (4%+RC+RC)	30.6797	19.7214	1.55566	0.36042
10	17-1 (18%+RC+HFHC)	179.616	21.7315	8.26521	1.91491	4%+RC+RC	0.114136	0.36042	1.56425	0.309129	0.411124	0.831891				0.598491	0.528635	0.215814
11	17-2 (18%+RC+HFHC)	300.425	20.1731	14.8924	3.45031	4%+RC+HFHC	0.971702	1.96578	1.07663	0.747763	2.23559	0.71691	0.813526	0.242242	0.422802	1.02144	0.665943	0.221981	P = 0.175
12	18-1 (18%+RC+RC)	58.4222	18.462	3.16446	0.733152
13	19-1 (4%+RC+HFHC)	168.114	17.4224	9.64933	2.23559
14	20-1 (4%+RC+RC)	115.943	17.1726	6.75166	1.56425											Mean		SE
15	21-1 (4%+RC+HFHC)	63.5678	20.5432	3.09435	0.71691											0.424332	1	0.0980725	0.231122
16	21-2 (4%+RC+HFHC)	74.0602	21.0915	3.51137	0.813526											2.33005	5.4911	0.434033	1.02286
17	22-1 (4%+RC+RC)	27.5148	20.6215	1.33428	0.309129
18	23-1 (4%+RC+HFHC)	28.2954	27.0621	1.04557	0.242242											0.650581	1.53319	0.201252	0.474281
19	23-2 (4%+RC+HFHC)	48.962	26.8298	1.82491	0.422802											0.695948	1.6401	0.0571022	0.13457
20	24-1 (4%+RC+RC)	29.3374	16.5327	1.77451	0.411124
21	24-2 (4%+RC+RC)	71.7299	19.9769	3.59064	0.831891											0.404061	0.952229	0.0688059	0.162151
22	25-2 (18%+RC+HFHC)	63.9245	21.364	2.99216	0.693234											1.35927	3.20332	0.276501	0.651615
23	26-1 (18%+RC+RC)	48.5224	18.4871	2.62466	0.60809
24	26-2 (18%+RC+RC)	24.2795	23.8143	1.01953	0.236209											0.598491	1.41043	0.215814	0.508598
25	27-1 (4%+RC - 5 WEEKS)	68.4454	22.2552	3.07548	0.712536											1.02144	2.40717	0.221981	0.52313
26	27-2 (4%+RC - 5 WEEKS)	76.4091	22.5366	3.39044	0.785508
27	27-3 (4%+RC - 5 WEEKS)	58.0257	22.7935	2.54571	0.589798
28	28-1 (18%+RC - 4 WEEKS)	28.9184	23.4873	1.23124	0.285257
29	28-2 (18%+RC - 4 WEEKS)	61.0286	20.5837	2.9649	0.686918
30	28-3 (18%+RC - 4 WEEKS)	78.4601	18.557	4.22805	0.979569		0.544446	3.43277		0.285257	0.712536		0.783532	0.369935		0.114136	0.971702
31	29-1 (4%- 4 WEEKS)	260.352	17.5716	14.8166	3.43277		=F169	1.33304		0.686918	0.785508		0.733152	1.46967		0.36042	1.96578
32	29-2 (4%- 4 WEEKS)	116.694	20.2815	5.75371	1.33304		0.304218	2.42722		0.979569	0.589798		0.60809	1.91491		1.56425	1.07663
33	30-1 (18%- 4 WEEKS)	66.9739	28.5	2.34996	0.544446			2.12717					0.236209	3.45031		0.309129	0.747763
34	30-2 (18%- 4 WEEKS)	179.788	22.8563	7.86603	1.82243								0.265644	0.693234		0.411124	2.23559
35	31-1 (4%- 4 WEEKS)	215.225	20.5437	10.4765	2.42722								0.154239			0.831891	0.71691
36	31-2 (4%- 4 WEEKS)	168.718	18.3761	9.18138	2.12717								0.506311				0.813526
37	32-1 (18%- 4 WEEKS)	34.3391	26.1516	1.31308	0.304218												0.242242
38	A (18%+RC+RC)	20.7848	18.1276	1.14658	0.265644												0.422802
39	G (18%+RC+RC)	22.459	33.7358	0.665732	0.154239
40	H (18%+RC+RC)	66.7871	30.5612	2.18536	0.506311
				4.31624
